# Supplementary material for: Factors associated with incomplete immunisation in children aged 12–23 months at subnational level, Nigeria: a cross-sectional study
Source: PubMed Central journal article supplement — BMJ Open. 2021 Jun 25;11(6):e047445. doi: 10.1136/bmjopen-2020-047445 (PMC8237740; doi:10.1136/bmjopen-2020-047445), 2021-06-25
Supplement: bmjopen-2020-047445.draft_revisions.pdf [file bmjopen-2020-047445.draft_revisions.pdf]

# BMJ Open

BMJ Open is committed to open peer review. As part of this commitment we make the peer review history of every article we publish publicly available.

When an article is published we post the peer reviewers' comments and the authors' responses online. We also post the versions of the paper that were used during peer review. These are the versions that the peer review comments apply to.

The versions of the paper that follow are the versions that were submitted during the peer review process. They are not the versions of record or the final published versions. They should not be cited or distributed as the published version of this manuscript.

BMJ Open is an open access journal and the full, final, typeset and author-corrected version of record of the manuscript is available on our site with no access controls, subscription charges or pay-per-view fees (<http://bmjopen.bmj.com>).

If you have any questions on BMJ Open's open peer review process please email [info.bmjopen@bmj.com](mailto:info.bmjopen@bmj.com)

# BMJ Open

## Determinants of incomplete immunization in children aged 12 to 23 months at sub-national level, Nigeria – a cross-sectional study

|                               |                                                                                                                                                                                                                                                                                                                                                                                                                                                                                                                                                                  |
|-------------------------------|------------------------------------------------------------------------------------------------------------------------------------------------------------------------------------------------------------------------------------------------------------------------------------------------------------------------------------------------------------------------------------------------------------------------------------------------------------------------------------------------------------------------------------------------------------------|
| Journal:                      | <i>BMJ Open</i>                                                                                                                                                                                                                                                                                                                                                                                                                                                                                                                                                  |
| Manuscript ID                 | bmjopen-2020-047445                                                                                                                                                                                                                                                                                                                                                                                                                                                                                                                                              |
| Article Type:                 | Original research                                                                                                                                                                                                                                                                                                                                                                                                                                                                                                                                                |
| Date Submitted by the Author: | 28-Nov-2020                                                                                                                                                                                                                                                                                                                                                                                                                                                                                                                                                      |
| Complete List of Authors:     | Eze, Paul; Penn State - Main Campus, Health Policy and Administration<br>Agu, Ujunwa; Enugu State University Teaching Hospital, Parklane, Enugu, Department of Paediatrics<br>Aniebo, Chioma; Enugu State University Teaching Hospital, Parklane, Enugu, Department of Paediatrics<br>Agu, Sergius; University of Nigeria Teaching Hospital, Department of Paediatrics<br>Lawani, Lucky; University of Toronto, Institute of Health Policy, Management & Evaluation<br>Acharya, Yubraj; Penn State - Main Campus, Department of Health Policy and Administration |
| Keywords:                     | Community child health < PAEDIATRICS, International health services < HEALTH SERVICES ADMINISTRATION & MANAGEMENT, Public health < INFECTIOUS DISEASES                                                                                                                                                                                                                                                                                                                                                                                                           |
|                               |                                                                                                                                                                                                                                                                                                                                                                                                                                                                                                                                                                  |

SCHOLARONE™  
Manuscripts

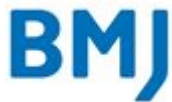

I, the Submitting Author has the right to grant and does grant on behalf of all authors of the Work (as defined in the below author licence), an exclusive licence and/or a non-exclusive licence for contributions from authors who are: i) UK Crown employees; ii) where BMJ has agreed a CC-BY licence shall apply, and/or iii) in accordance with the terms applicable for US Federal Government officers or employees acting as part of their official duties; on a worldwide, perpetual, irrevocable, royalty-free basis to BMJ Publishing Group Ltd ("BMJ") its licensees and where the relevant Journal is co-owned by BMJ to the co-owners of the Journal, to publish the Work in this journal and any other BMJ products and to exploit all rights, as set out in our [licence](#).

The Submitting Author accepts and understands that any supply made under these terms is made by BMJ to the Submitting Author unless you are acting as an employee on behalf of your employer or a postgraduate student of an affiliated institution which is paying any applicable article publishing charge ("APC") for Open Access articles. Where the Submitting Author wishes to make the Work available on an Open Access basis (and intends to pay the relevant APC), the terms of reuse of such Open Access shall be governed by a Creative Commons licence – details of these licences and which [Creative Commons](#) licence will apply to this Work are set out in our licence referred to above.

Other than as permitted in any relevant BMJ Author's Self Archiving Policies, I confirm this Work has not been accepted for publication elsewhere, is not being considered for publication elsewhere and does not duplicate material already published. I confirm all authors consent to publication of this Work and authorise the granting of this licence.

1 Research Article

## 2 **Determinants of incomplete immunization in children aged 12 to 23 months at sub-national** 3 **level, Nigeria – a cross-sectional study**

4 Paul Eze<sup>1\*</sup>, Ujunwa Justina Agu<sup>2</sup>, Chioma Lynda Aniebo<sup>2</sup>, Sergius Alex Agu<sup>3</sup>, Lucky Osaheni Lawani<sup>4</sup>, and Yubraj Acharya<sup>1</sup>

- 5  
6  
7  
8 1. Department of Health Policy & Administration, Penn State University, University Park, PA 16802, USA  
9 2. Department of Paediatrics, Enugu State University Teaching Hospital, Parklane, Enugu, Nigeria  
10 3. Department of Paediatrics, University of Nigeria Teaching Hospital, Ituku-Ozalla, Enugu, Nigeria  
11 4. Institute of Health Policy, Management & Evaluation, University of Toronto, Toronto, ON M5T 3M6, Canada  
12

13 \*Corresponding Author

14 Email: [peze@psu.edu](mailto:peze@psu.edu)

15 Tel. +1 223 216 1640

16  
17  
18 Email address & ORCID number of co-authors:

- 19 1. Paul Eze: [peze@psu.edu](mailto:peze@psu.edu) | 0000-0001-7202-8676  
20 2. Ujunwa Justina Agu: [uagu247@gmail.com](mailto:uagu247@gmail.com)  
21 3. Chioma Lynda Aniebo: [drcaniebo@gmail.com](mailto:drcaniebo@gmail.com)  
22 4. Sergius Alex Agu: [agusergiusalex@gmail.com](mailto:agusergiusalex@gmail.com) | 0000-0002-0566-2068  
23 5. Lucky Osaheni Lawani: [osaheni.lawani@mail.utoronto.ca](mailto:osaheni.lawani@mail.utoronto.ca) | 0000-0002-5350-7441  
24 6. Yubraj Acharya: [yua36@psu.edu](mailto:yua36@psu.edu) | 0000-0002-9003-636X  
25  
26  
27  
28  
29  
30

### 31 **Word Count**

32 **Abstract:** 299 words (Max, 300) | **Text:** 3,399 words (Max, 4,000) | **Table/figures:** 4 + 1 (Max, 5) | **References:** 59 (Max, NA)

### 33 **Abstract**

34  
35 **Objectives:** National immunization coverage rate masks sub-national immunization coverage gaps at the state and local  
36 district levels. The study was performed to determine the socio-demographic determinants of incomplete immunization in  
37 children at a sub-national level.  
38  
39

40 **Design:** Cross-sectional study using the World Health Organization sampling method (2018 Reference Manual).  
41

42 **Setting:** Fifty randomly selected clusters (wards) in four districts (two urban and two rural) in Enugu State, Nigeria.  
43

44 **Participants:** 1,254 mothers of children aged 12-23 months in July 2020.  
45

46 **Primary and secondary outcome measures:** Fully immunized children and not fully immunized children.  
47

48 **Results:** Full immunization coverage (FIC) rate in Enugu State was 78.9% (95% CI = 76.5% – 81.1%). However, stark  
49 difference exists in FIC rate in urban versus rural districts. Only 55.5% of children in rural communities are fully immunized  
50 compared to 94.5% in urban communities. Significant predictors of incomplete immunization are: children of single mothers  
51 (aOR = 5.74, 95% CI = 1.45 – 22.76), children delivered without skilled birth attendant present (aOR = 1.93, 95% CI = 1.24 –  
52 2.99), children of mothers who did not receive postnatal care (aOR = 6.53, 95% CI = 4.17 – 10.22), children of mothers with  
53 poor knowledge of routine immunization (aOR = 1.76, 95% CI = 1.09 – 2.87), dwelling in rural district (aOR = 7.49, 95% CI =  
54 4.84 – 11.59), low-income families (aOR = 1.56, 95% CI = 1.17 – 2.81), and living further than 30 minutes from the nearest  
55 vaccination facility (aOR = 2.15, 95% CI = 1.31 – 3.52).  
56  
57  
58  
59  
60

**Conclusions:** Although the proportion of fully-immunized children in Enugu State is low, it is significantly lower in rural districts. Study findings suggest that strategies to improve awareness and geographical accessibility while ensuring functional primary healthcare centers especially in rural underserved district could be effective in achieving the “Reaching Every Districts” immunization coverage targets at every local district.

### Strengths and limitations of this study

- Our study highlights critical gap in the global efforts to improve immunization coverage in sub-Saharan Africa by demonstrating stark disparity in immunization uptake in rural districts vis-à-vis urban districts at the subnational level.
- Our study did not comprehensively assess all the factors that could impact vaccine delivery in this context including health system factors such as vaccine availability, health care personnel, and logistics, and paternal factors. Although this was not the primary goal of the study
- This study did not assess uptake of recently introduced vaccines such as Rotavirus vaccine and Pneumococcal Conjugate Vaccine
- This study relied heavily on maternal recall which though demonstrated to be a reliable estimate in other setting in sub-Saharan Africa, which could have introduced differential overestimation or underestimation of immunization coverage in our study.
- Due to deteriorating security situation in the country and the absence of security assurances, this study did not access pockets of historically healthcare-marginalized population in Fulani settlements

**Keywords:** Immunization, Children, Determinants, Nigeria

### Introduction

Immunization, defined as the process that makes a person immune or resistant to an infectious disease, typically by the administration of a vaccine, is one of the most effective interventions in contemporary public health practice [1,2]. Several cost-benefits analyses have consistently placed immunization as one of the most cost-effective health interventions with huge direct and societal benefits [3–8]. Immunization saves about 2-3 million lives every year [1,2], and has successfully led to the elimination of a number of vaccine-preventable diseases in some high-income countries, including polio, diphtheria, and pertussis [3,9]. Indeed, childhood immunization has had a remarkable impact on child morbidity and mortality worldwide with immense positive multiplier effects on the larger communities [3,5,9]

Nigeria is one of the 10 countries (Angola, Brazil, the Democratic Republic of the Congo, Ethiopia, India, Indonesia, Mexico, Nigeria, Pakistan, and the Philippines) that account for over 60% of the children who did not get DTP3 in 2019 [1]. DTP3 coverage is an indicator of how well countries are providing routine immunization services [2]. In 2017, about 20% of the world’s infants with incomplete DPT immunization lived in Nigeria [10]. Three million of the estimated 8.9 million infants in the WHO African Region (AFR) who did not receive any measles containing vaccine (MCV-1) in 2015 live in Nigeria [11]. Hence, Nigeria accounts for nearly 40% of the 28,279 confirmed measles cases reported from the WHO African Region in 2016 [12].

1 The EPI in Nigeria, created in 1979, had a significant impact during the first few years with immunization coverage peaking at  
2 81.5% in 1990 [13–15]. Immunization coverage plummeted to 12.3% in 2003 [15]. Several strategies were deployed in  
3 subsequent years to address the low immunization coverage, including routine immunization (RI) strengthening,  
4 supplemental immunization activities, global positioning system (GPS) tracker, and several community-level interventions  
5 [16]. Despite these efforts, preliminary results of the 2019 National Nutrition and Health Survey (NNHS) suggests a national  
6 DTP3 coverage of 67% [17]. However, even the low national immunization coverage rates mask subnational immunization  
7 coverage gaps at the state and local district levels [18]. For example, immunization coverage ranged from 5% to 48% across  
8 states in northern Nigeria in the 2018 National Demographic and Health Survey [19].  
9

11 “Reaching every district” (RED) is a World Health Organization (WHO) strategy to achieve 80% immunization coverage in all  
12 districts and 90% nationally by 2020 [20]. Despite overall improvements in immunization coverage at the national level [20],  
13 geographic variations in the immunization coverage continues to hamper achieving RED targets at most sub-national and  
14 district levels [18]. Achieving this geographical parity, however, depends on capturing and understanding local patterns of  
15 coverage required to provide optimal, child-focused vaccine delivery services [1,18]. Also, while nationally representative  
16 surveys such as the Demographic and Health Survey (DHS) and Multiple Indicator Cluster Survey (MICS) have a standardized  
17 data collection procedures across countries that is also consistent content over time [21], presenting immunization coverage  
18 at national levels fails to capture the all-important local patterns of coverage required to properly fine-tune vaccine delivery  
19 services. Furthermore, relying on sub-national administrative data for assessing immunization system performance and  
20 tracking progress towards the RED district-level goals is often fraught with limitations such as missing data and poor data  
21 quality [18,22].  
22  
23  
24

25 This study seeks to identify determinants of incomplete immunization at the sub-national level using Enugu State as point of  
26 focus. Enugu State has a high number of unimmunized children[23], and has the lowest proportion of children with complete  
27 immunization in the southeast region [24]. Hence, employing the World Health Organization multi-stage sampling methods  
28 for community survey [25], this study aims to define identify the sociodemographic determinants of incomplete  
29 immunization in children aged 12 to 23 months at a sub-national and local level. Our findings could help tailor strategies and  
30 operational plans to address immunization gaps and reach children in every district with life-saving vaccines.  
31  
32  
33  
34

## 35 **Methods**

36 This was a community-based cross-sectional survey of mothers of children 12–23 months old residing in Enugu State in July  
37 2020. At the time of the study, all children 12–23 months old were considered eligible for sampling. The Strengthening the  
38 Reporting of Observational Studies in Epidemiology (STROBE) guidelines were used to ensure appropriate reporting of our  
39 study’s design, conduct, and findings [26].  
40

### 41 **Study setting**

42 Nigeria is the most populous country in Africa and the sixth most populous in the world [27]. She is located in Western Africa  
43 and is divided into six geopolitical regions: Northeast, Northwest, Northcentral, Southsouth, Southeast and Southwest. She  
44 has 36 states – the second administrative division, and a federal capital territory in Abuja. Each state is further divided into  
45 smaller administrative units called local government areas (LGA) and each LGA is further divided into wards.  
46  
47

48 Enugu State is one of the 36 states, in Nigeria (**Figure 1**) and one of the five states that make up the southeast geopolitical  
49 region in the country. Enugu State is further divided into 17 local government areas (LGA), four of which are predominantly  
50 urban (Enugu East, Enugu North, Enugu South, and Nsukka) and the rest are predominantly rural. Enugu State’s 2020  
51 projected population is 4,769,916, with most of the population living in urban centres in Enugu and Nsukka [28,29].  
52  
53

### 54 **Sample size**

55 Using steps described in the WHO Vaccination Coverage Cluster Surveys Reference Manual 2019 [25], we determined the  
56 sample size using immunization coverage of 36% obtained for Enugu State in the most recent DHS 2018 [24], significance  
57  
58  
59

level of 5.0%, precision of 5.0%, design effect (DEFF) of 2.5 [30], and an inflation of 15% (to account for non-response). The calculated minimum sample size was 1,183. This was increased to 1,250 to boost the power of the study.

### Sampling procedure

A three-stage sampling technique was used. In the first stage, a simple random sampling technique by balloting was used to select four local government areas, two each from the urban and rural areas of the state. In the second stage, a total of 50 clusters based on probability-proportional-to-size of the population; 15 clusters from Enugu East LGA, 15 clusters from Enugu North LGA, and 10 clusters each from Ezeagu LGA and Udenu LGA were randomly selected by balloting. In the third stage, we selected 25 households in each of the 50 clusters (ward) selected in the second stage. The first household in each cluster was selected randomly and subsequent households were selected contiguously in the right direction until the required number of households for that cluster was achieved. From each selected household, one eligible child was selected. If a selected household had more than one eligible child, the youngest child older than 12 months was selected. If a selected household had no eligible child, the next contiguous household was visited, and one eligible child was selected.

### Data collection

Data were collected by a team of 14 trained community health workers using structured pre-tested interviewer-administered questionnaires. The questionnaire was constructed from a review of the available literature on immunization surveys in similar contexts [31–33], and tested for acceptability and logical structure in a sample of 20 mothers before the study. The team was trained on the study's objectives, interpreting, and extracting data from health cards/vaccination certificates, sampling techniques, ethical issues including the process of taking informed verbal consent, and administration of the questionnaire. The questionnaire was administered in Igbo (the local language) except for a few non-Igbo speakers who were administered the questionnaire in English. Questions were directed to the mothers, and only the mothers' response was recorded.

Data collected include socio-demographic characteristics of mothers and children including maternal healthcare (MHC) utilization [ante-natal care (ANC), skilled birth attendant (SBA) present at birth, and post-natal care (PNC)], knowledge of mothers regarding RI, immunization status of children, and reasons for any non-vaccination. If the immunization card was available, immunization information of each inoculation received by the child was recorded. If a child had never received an immunization card or the mother was unable to present the immunization card to the interviewer, the immunization data/information for the child was based on the mother's report.

To evaluate mothers' knowledge of RI and vaccine-preventable diseases (VPDs), the interviewers asked questions on the correct purpose of immunization, different vaccine-preventable diseases, the correct age for receiving the vaccines, and the total number of visits required to complete the recommended vaccination for the child. Responses were evaluated as per the National Primary Healthcare Development Agency (NPHCDA) routine immunization schedule [34]. Correct responses were scored 2 points, incorrect responses 1 point, 'I do not know' 0 (zero) point.

### Outcome variable

Children were categorized as fully immunized, partially immunized, or un-immunized (zero-dose) based on the types and doses of antigens received. A "fully immunized child" was defined as a child who had received one dose of BCG, three doses of OPV (excluding OPV given at birth), three doses of Pentavalent vaccine, and one dose of measles vaccine by 12 months of age; a partially immunized child was defined as a child who missed at least any one of the above doses; while an "un-immunized" or "zero-dose" child was defined as a child who had not received any vaccine by 12 months of age [35]. Incomplete immunization, in this study, includes partially immunized children and unimmunized (zero-dose) children. Immunization status was based on mothers' recall and immunization card record (that is, where the mother presents an immunization card, the child's immunization status is based on records in the card, but where an immunization card is not available, the immunization status is based on mothers' recall) as recommended by the World Health Organization [25]. This method has been used in a number of similar studies [31,36], and proven to be a reliable assessment of immunization coverage [37–39].



## Data analysis

Data were entered into Microsoft Excel® (Microsoft, Redmond, WA, USA), cleaned and transferred to IBM SPSS® version 27.0 (IBM, Armonk, NY, USA) for statistical analyses. Frequency and percentage were used to describe the data, and Chi-square test was used to test for statistical significance. T-test was used to assess for statistical difference in the mean scores for knowledge of RI. Multivariate logistics regression analyses were performed to estimate adjusted odds ratios with 95 % Confidence Interval (CI) while adjusting for mothers age, marital status, mothers educational status, mothers occupation, religion, ethnic/tribal group, family monthly income, sex of the index child, and source of information on immunization. Aggregate scores for questions on awareness of RI were dichotomized into satisfactory knowledge (10 points and above) and poor knowledge (less than 10 points) prior to inclusion in the regression model.  $P < 0.05$  was used to define statistical significance, and all tests were two-tailed.

## Results

### Socio-demographic characteristics of mothers and children

A total of 1,254 distinct mothers were interviewed with mean (SD) age of 28.7 (4.3) years. Forty-eight percent of mothers were aged 20 – 29 years old, about 89.9% were married, 93.9% had at least secondary education or higher, and about three-quarters (75.5%) were employed. The mean (SD) age of the children was 16.8 (3.3) months, the age ranged from 12 to 23 months, and about half (51.0%) were girls – **Table 1**.

### Full immunization coverage (FIC) rate

The FIC rate in Enugu State was 78.9% (95% CI = 76.5% – 81.1%), the partially immunized rate was 15.7% (95% CI = 13.7% – 17.8%), while the unimmunized (zero-dose) rate was 5.4% (95% CI = 4.2% – 6.8%) – **Table 2**. Vaccination coverage rates for Yellow fever vaccine and Vitamin A supplement were 86.2% (95% CI = 84.2% – 88.1%) and 84.4% (82.3% – 86.4%), respectively. DPT3 vaccination coverage rate, which is the Pentavalent-3 coverage rate in this study, was 83.9% (95% CI = 81.7% – 85.9%).

Immunization coverage rates differed based on the rurality-urbanity of communities in the state. FIC rate was 94.5% (95% CI = 92.7% – 96.1%) in urban communities and 55.5% (95% CI = 51.0% – 59.9%) in rural communities. In both urban and rural communities, the proportion of children vaccinated with antigens given at birth and six weeks of age were more than the proportions of children vaccinated with antigens given at later ages.

Of the 1,254 children, 578 possessed immunization cards, indicating an immunization card retention rate of 48.7% (95% CI = 45.9% - 51.6%). About two-fifth of unvaccinated (zero-dose) children were not vaccinated because vaccination sites were too far while another two-fifth reported absence of vaccines in the health facility.

### Determinants of immunization status

**Table 3** shows results from a bivariate analysis of maternal health care utilization history and knowledge of RI. Use of skilled birth attendants (SBA) during delivery of index child, and reception of postnatal care (at least one postnatal visit) were statistically significant predictors of incomplete immunization. Insufficient knowledge of RI was also statistically significantly associated with incomplete immunization.

Multivariate logistics regression analyses show that single mothers (aOR = 5.74, 95% CI = 1.45 – 22.76), mothers who delivered without SBA (aOR = 1.93, 95% CI = 1.24 – 2.99), mothers who did not receive any postnatal care (aOR = 6.53, 95% CI = 4.17 – 10.22), and mothers with poor knowledge of routine immunization (aOR = 1.76, 95% CI = 1.09 – 2.87) were significant predictors of incomplete immunization – **Table 4**. Community level predictors for incomplete immunization were rural community (aOR = 7.49, 95% CI = 4.84 – 11.59), low-income families (aOR = 1.56, 95% CI = 1.17 – 2.81), and living further than 30 minutes from the nearest vaccination facility (aOR = 2.15, 95% CI = 1.31 – 3.52).



## Discussion

This study evaluated immunization coverage data in urban and rural areas of Enugu State and offers a close-up assessment of sociodemographic determinants of incomplete immunization at the sub-national and local level. There are four main findings from this study. First, this assessment of immunization coverage of children aged 12-23 months in 50 randomly selected wards in rural and urban districts (LGA) in Enugu State found FIC rate in Enugu state to be low, below the RED's subnational target of 80% immunization coverage. While the FIC rate in this study is higher than FIC rates reported in other sub-regions in Nigeria [32,40], and Ethiopia [41,42], it is lower than FIC rates reported in Cameroon [36], and Ghana [43]. About one in five (21.1%) children aged 12-23 months in the state were not fully immunized. This finding suggests that even after almost two decades of implementing the RED strategy in Nigeria, some states in the southern region with purportedly high immunization coverage [14], are still yet to meet the (RED's) subnational immunization target. This partially explains why huge investments in immunization activities have had minimal impact on the incidence of vaccine preventable diseases in Enugu State [44].

Secondly, further analysis based on rurality of residence reveals stark disparity in the FIC rate between urban communities and rural communities. Urban communities had a substantially higher FIC rate (94.5%) than rural communities (55.5%). This observation is consistent with findings in other sub-regions in Nigeria [40,45], and Ethiopia [41,42], but differs with findings in Bayelsa State, Nigeria where immunization coverage was higher in the rural community than in the urban community [46]. Our data show that almost half of infants in rural communities miss out on at least one of the critical life-saving BCG, Pentavalent, OPV, and Measles vaccines. This finding underscores the importance of monitoring data at sub-district levels to identify vaccination gaps and tailor operational strategies accordingly.

Thirdly, the low DPT-3 coverage in rural communities (63.0%) points to gaps in RI delivery in those communities and is consistent with a study conducted in another rural community in Enugu[47]. Furthermore, the immunization dropout rate in both urban and rural communities is low, below the 10% cut-off recommended by WHO [48]. The low immunization dropout rate amidst low DPT-1 coverage in rural communities suggests that access to RI in these contexts remains a problem [48], as previous studies have argued[47]. There are many factors responsible for the rural-urban differences in access. For example, vaccination points are more geographically accessible to families in urban communities than in rural communities [10,49,50], rural communities incur higher travel costs to reach vaccination points[50], and rural communities are less aware of the importance of immunization[10,40].

Finally, this study was undertaken to elucidate the socio-demographic predictors of incomplete immunization in children at the sub-national level. Predictors of incomplete immunization identified in this study include marital status, MHC utilization, poor knowledge of routine immunization, poor family income, and geographical accessibility. Children of single mothers are less likely to be fully immunized compared to married mothers. Married mothers are more financially stable and most likely to discuss the health needs of their children, including immunization [43,49]. Also, stigma, psychological trauma, and hardship associated with single motherhood in these context negatively impacts access to health and vaccination [43,49]. MHC utilization also significantly predicts incomplete immunization. Mothers who give birth using SBA are more likely to have them fully immunized than mothers who did not use SBA. Likewise, mothers who receive PNC care are more likely to have their children fully immunized. This is consistent with several studies in other LMICs that demonstrate that increased health communications on immunization during MHC utilization significantly impacts childhood immunization [49,51]. However, given that the sequence of MHC utilization is ANC-SBA-PNC, the absence of a significant effect for ANC in this study does not imply that adequate ANC attendance does not impact RI. Instead, our data suggest that other factors such as accessibility to health facilities could have a stronger impact on RI than adequately attending ANC [52].

## Strengths and limitations

Our study extends the body of knowledge on immunization uptake in rural areas vis-à-vis urban areas at the subnational level, our results can be generalized to similar contexts in Nigeria and beyond, and provides important evidence to policymakers and program managers for improving immunization coverage. However, our study is not without limitations. First, the effects of health system factors including vaccine availability, health care personnel, and logistics [53,54], which are known to influence uptake of immunization coverage were not adequately explored. Also, paternal factors that may influence the completion of immunization were not also evaluated [49]. However, the primary goal of this study was not to

1 assess the effect of these factors. Secondly, new vaccines recently introduced into the Nigeria RI schedule (specifically,  
2 Rotavirus vaccine and Pneumococcal Conjugate Vaccine (PCV)) were not explored [55,56]. Thirdly, although maternal recall  
3 has been shown to be a reliable estimate of maternal recall in Senegal, Ethiopia, and Tanzania [37–39], there is little evidence  
4 that it is a reliable coverage measure in Nigeria. A similar study in Osun State showed that agreement between the mothers'  
5 recall and immunization card assessment was low [32]. This (maternal recall) could have also biased our estimates. Finally,  
6 pockets of hard-to-reach Fulani settlements that have been shown to have poor immunization coverage were not included in  
7 our sample [57]. Due to the deteriorating security situation in the country and the absence of security assurances, we could  
8 not send data collectors to these settlements.  
9

### 11 **Policy implications**

12  
13 Our study findings have policy implications for vaccination delivery in low- and middle-income countries laboring to improve  
14 national and subnational immunization coverage. First, innovative solutions to improve geographical accessibility are  
15 undoubtedly needed to achieve RED targets at local levels. For example, Sibeudu et al have suggested providing RI services in  
16 marketplaces on local market days [50]. Implementing such ingenious solutions while ensuring functional primary healthcare  
17 centers in every ward could reduce the existing urban-rural immunization coverage gap. Additionally, our study findings also  
18 suggest that strategies aimed at improving MHC utilization, especially in underserved rural communities, could be effective in  
19 achieving the RED national and sub-national targets [51]. Furthermore, comprehensive sensitization campaigns on  
20 immunization programmes should be strengthened in rural communities to improve the effectiveness of immunization  
21 programme [44]. Finally, educational and reminder interventions that leverage on existing mobile phone technology  
22 obtainable in almost all rural communities in Nigeria could improve immunization awareness, timeliness, and coverage  
23 [58,59].  
24  
25  
26  
27

### 28 **Conclusions**

29  
30 The FIC rate in rural communities in Enugu State is below the RED target of 80 % for all antigens by 2020. About one in two  
31 children in rural communities in Enugu State is not fully immunized. Determinants of full immunization are single  
32 motherhood, maternal healthcare utilization, family income, rural residence, and geographical proximity to health facilities.  
33 Providing routine immunization services in marketplaces on local market days could improve rural access to RI while ensuring  
34 that there is a functional primary healthcare center in every ward could reduce the existing urban-rural immunization  
35 coverage disparity. Mobile phone educational and reminder interventions could improve immunization awareness,  
36 timeliness, and coverage.  
37  
38  
39  
40  
41  
42  
43  
44  
45  
46  
47  
48  
49  
50  
51  
52  
53  
54  
55  
56  
57  
58  
59  
60

**List of abbreviations**

|               |                                  |
|---------------|----------------------------------|
| <b>ANC</b>    | Antenatal care                   |
| <b>BCG</b>    | Bacille Calmette Guerin          |
| <b>DEFF</b>   | Design effect                    |
| <b>DPT</b>    | Diphtheria-Pertussis-Tetanus     |
| <b>EPI</b>    | Expanded program on immunization |
| <b>FIC</b>    | Full immunization coverage       |
| <b>GVAP</b>   | Global Vaccine Action Plan       |
| <b>LMIC</b>   | Low- and middle-income countries |
| <b>MHC</b>    | Maternal Healthcare              |
| <b>OPV</b>    | Oral polio vaccine               |
| <b>PNC</b>    | Postnatal care                   |
| <b>RI</b>     | Routine immunization             |
| <b>SBA</b>    | Skilled birth attendant          |
| <b>TT</b>     | Tetanus toxoid                   |
| <b>UNICEF</b> | United Nations Children's Fund   |
| <b>VPD</b>    | Vaccine preventable diseases     |
| <b>WHO</b>    | World Health Organization        |

## Declarations

### Ethics approval and consent to participate

Ethical approval for the study was obtained from the Ethical Committee of the Enugu State University Teaching Hospital – Reference number: ESUTHP/C-MAC/RA/034/Vol1/264. Permission was also obtained from the State Ministry of Health, Enugu.

Informed verbal consent was obtained from each mother before participating in the study. Verbal consent was deemed appropriate and approved by the ethics committee. Informed verbal consent consisted of a description of the objectives of the study, assurance of confidentiality of personal information, and a specific request for permission to conduct the interview. Consent was obtained in Igbo (the local language) except for a few non-Igbo speaker whose consent was obtained in English. Where the mother was less than 18 years, consent to participate in the study was obtained from the husband (if mother was married) or from the mother's mother/father (if the mother was single).

Children with zero or incomplete immunization were referred to the nearest health center for vaccination. All patient identifiers were removed prior to statistical analysis.

### Consent for publication

Not applicable

### Availability of data and materials

The dataset generated and analyzed in this study is freely available from the corresponding author on reasonable request or directly from the data repository, Zenodo, <http://doi.org/10.5281/zenodo.4294847>

### Competing interests

None declared.

### Funding

This research received no specific grant from any funding agency in the public, commercial or not-for-profit sectors'

### Author contributions

PE and YA conceptualized the study, oversaw its conduct, analyzed the data, interpreted the results, drafted the original article, and reviewed the final draft. UJA, CLA, SAA, and LOL contributed to the collection and analysis of the data, interpretation of the results, and review of the final draft. All authors read and approved the final manuscript.

### Acknowledgements

The authors are immensely grateful to Mrs Priscilla Aniekwe and George Okafor for invaluable assistance with the data collection. We are also indebted to our team of community social workers without whom this study would not have been possible.

### Authors' information (optional)

Not applicable

## References

1. World Health Organization. Immunization coverage [Internet]. Fact sheets. 2020 [cited 2020 Aug 22]. Available from: <https://www.who.int/news-room/fact-sheets/detail/immunization-coverage>
2. United Nations Children Fund (UNICEF). Immunization [Internet]. UNICEF Data: Monitoring the situation of children and women. 2020 [cited 2020 Aug 2]. Available from: <https://data.unicef.org/topic/child-health/immunization/>
3. Orensteina WA, Ahmed R. Simply put: Vaccination saves lives. *Proc Natl Acad Sci*. 2017;114(16):4031–3.
4. Rémy V, Zöllner Y, Heckmann U. Vaccination: the cornerstone of an efficient healthcare system. *J Mark Access Heal Policy*. 2015;3(1):27041.
5. Zhou F, Shefer A, Wenger J, Messonnier M, Wang LY, Lopez A, et al. Economic evaluation of the routine childhood immunization program in the united states, 2009. *Pediatrics*. 2014;133(4):577–85.
6. Bärnighausen T, Bloom DE, Canning D, Friedman A, Levine OS, O'Brien J, et al. Rethinking the benefits and costs of childhood vaccination: The example of the Haemophilus influenzae type b vaccine. *Vaccine*. 2011;29(13):2371–80.
7. Armstrong EP. Economic benefits and costs associated with target vaccinations. In: *Journal of Managed Care Pharmacy*. 2007. p. 12–5.
8. Zhou F, Santoli J, Messonnier ML, Yusuf HR, Shefer A, Chu SY, et al. Economic evaluation of the 7-vaccine routine childhood immunization schedule in the United States, 2001. *Arch Pediatr Adolesc Med*. 2005;159(12):1136–44.
9. Greenwood B. The contribution of vaccination to global health: Past, present and future. *Philos Trans R Soc B Biol Sci*. 2014;369(1645):1–5.
10. Obanewa OA, Newell ML. The role of place of residency in childhood immunisation coverage in Nigeria: Analysis of data from three DHS rounds 2003–2013. *BMC Public Health*. 2020;20(1):1–13.
11. Masresha BG, Dixon MG, Kriss JL, Katsande R, Shibeshi ME, Luce R, et al. Progress Toward Measles Elimination — African Region , 2013 – 2016. *Morb Mortal Wkly Rep*. 2017;66(17):436–43.
12. Masresha BG, Braka F, Onwu NU, Oteri J, Erbetto T, Oladele S, et al. Progress Towards Measles Elimination in Nigeria: 2012 – 2016. *J Immunol Sci Res [Internet]*. 2018;S(020):135–9. Available from: <http://www.immunologyresearchjournal.com/articles/progress-towards-measles-elimination-in-nigeria-2012--2016.pdf>
13. Adedokun ST, Uthman OA, Adekanmbi VT, Wiysonge CS. Incomplete childhood immunization in Nigeria: A multilevel analysis of individual and contextual factors. *BMC Public Health*. 2017;17(236):1–10.
14. Anyene BC. Routine Immunization in Nigeria: The role of Politics, and Cultural practices. *African J Heal Econ*. 2014;03(1):01–9.
15. Ophori EA, Tula MY, Azih A V, Okojie R, Ikpo EP. Current trends of immunization in Nigeria: Prospect and challenges. *Trop Med Health*. 2014;42(2):67–75.
16. Adelaye D, Jacobs W, Amuta AO, Ogundipe O, Mosaku O, Gadanya MA, et al. Coverage and determinants of childhood immunization in Nigeria: A systematic review and meta-analysis. *Vaccine [Internet]*. 2017;35(22):2871–81. Available from: <http://dx.doi.org/10.1016/j.vaccine.2017.04.034>
17. World Health Organization, United Nations Children Fund (UNICEF). Nigeria - WHO and UNICEF estimates of immunization coverage, 2019 revision [Internet]. WHO UNICEF Immunization Coverage Estimates. 2020 [cited 2020 Aug 2]. p. 1–33. Available from: [https://www.who.int/immunization/monitoring\\_surveillance/data/nga.pdf](https://www.who.int/immunization/monitoring_surveillance/data/nga.pdf)
18. Mosser JF, Gagne-Maynard W, Rao PC, Osgood-Zimmerman A, Fullman N, Graetz N, et al. Mapping diphtheria-pertussis-tetanus vaccine coverage in Africa, 2000–2016: a spatial and temporal modelling study. *Lancet [Internet]*. 2019;393(10183):1843–55. Available from: [http://dx.doi.org/10.1016/S0140-6736\(19\)30226-0](http://dx.doi.org/10.1016/S0140-6736(19)30226-0)
19. Gunnala R, Ogbuanu IU, Adegoke OJ, Scobie HM, Uba B V, Wannemuehler KA, et al. Routine vaccination coverage in northern nigeria: Results from 40 district-level cluster surveys, 2014–2015. *PLoS One*. 2016;11(12):2014–5.
20. World Health Organization. The RED strategy [Internet]. Immunization, Vaccines and Biologicals. 2018 [cited 2020 Aug 22]. Available from: [https://www.who.int/immunization/programmes\\_systems/service\\_delivery/red/en/](https://www.who.int/immunization/programmes_systems/service_delivery/red/en/)
21. Corsi DJ, Neuman M, Finlay JE, Subramanian S V. Demographic and health surveys: A profile. *Int J Epidemiol*. 2012;41(6):1602–13.
22. Dunkle SE, Wallace AS, MacNeil A, Mustafa M, Gasasira A, Ali D, et al. Limitations of using administratively reported immunization data for monitoring routine immunization system performance in Nigeria. *J Infect Dis*. 2014;210(Suppl 1):S523–30.

- 1  
2  
3  
4  
5  
6  
7  
8  
9  
10  
11  
12  
13  
14  
15  
16  
17  
18  
19  
20  
21  
22  
23  
24  
25  
26  
27  
28  
29  
30  
31  
32  
33  
34  
35  
36  
37  
38  
39  
40  
41  
42  
43  
44  
45  
46  
47  
48  
49  
50  
51  
52  
53  
54  
55  
56  
57  
58  
59  
60
23. World Health Organization. Enugu State inaugurates Task Force on Immunization, to close gaps in immunization coverage [Internet]. WHO Africa / Nigeria. 2020 [cited 2020 Apr 20]. Available from: <https://www.afro.who.int/news/enugu-state-inaugurates-task-force-immunization-close-gaps-immunization-coverage>
  24. National Population Commission (NPC) Nigeria, ICF. Nigeria Demographic Health Survey 2018 [Internet]. Abuja, Nigeria and Rockville, Maryland, USA; 2019. Available from: <https://dhsprogram.com/publications/publication-fr359-dhs-final-reports.cfm>
  25. World Health Organization. World Health Organization Vaccination Coverage Cluster Surveys: Reference Manual [Internet]. Geneva: World Health Organization; 2018. 234 p. Available from: [https://www.who.int/immunization/documents/who\\_ivb\\_18.09/en/](https://www.who.int/immunization/documents/who_ivb_18.09/en/)
  26. Von Elm E, Altman DG, Egger M, Pocock SJ, Gøtzsche PC, Vandenbroucke JP. The Strengthening the Reporting of Observational Studies in Epidemiology (STROBE) statement: Guidelines for reporting observational studies. *Epidemiology*. 2007;18(6):800–4.
  27. Ekoh PC, George E, Ejimkaraonye C. Nigeria demographic report: the effect of overpopulation on life expectancy. *African Popul Stud*. 2020;34(1):5106–14.
  28. National Population Commission, National Bureau of Statistics. National, State and Local Government Population Forecasts. Abuja, Nigeria: National Population Commission; 2016.
  29. World Bank. Population growth (annual %) - Nigeria [Internet]. Data. 2020 [cited 2020 Aug 20]. Available from: <https://data.worldbank.org/indicator/SP.POP.GROW?end=2019&locations=NG&start=2010>
  30. Odusanya OO, Alufohai EF, Meurice FP, Ahonkhai VI. Determinants of vaccination coverage in rural Nigeria. *BMC Public Health*. 2008;8:1–8.
  31. Uzochukwu BS, Okeke CC, Envuladu E, Mbachu C, Okwuosa C, Onwujekwe OE. Inequity in access to childhood immunization in Enugu urban, Southeast Nigeria. *Niger J Clin Pract*. 2017;20(8):971–7.
  32. Adedire EB, Ajayi I, Fawole OI, Ajumobi O, Kasasa S, Wasswa P, et al. Immunisation coverage and its determinants among children aged 12-23 months in Atakumosa-west district , Osun State Nigeria : a cross-sectional study. *BMC Public Health* [Internet]. 2016;16(905):1–8. Available from: <http://dx.doi.org/10.1186/s12889-016-3531-x>
  33. Gidado S, Nguku P, Biya O, Waziri NE, Mohammed A, Nsubuga P. Determinants of routine immunization coverage in Bungudu , Zamfara State , Northern Nigeria , May 2010. *Pan Afr Med J*. 2014;18(Suppl 1):1–5.
  34. National Primary Healthcare Development Agency (NPHCDA). National Immunization Schedule in Nigeria [Internet]. Publications. 2018 [cited 2020 Jun 22]. Available from: <https://nphcda.gov.ng/wp-content/uploads/delightful-downloads/2018/01/National-Immunization-Schedule-in-Nigeria.pdf>
  35. World Health Organization. Fully Immunized Child Rate [Internet]. The Global Health Observatory. 2020 [cited 2020 Aug 20]. Available from: <https://www.who.int/data/gho/indicator-metadata-registry/imr-details/3376>
  36. Russo G, Miglietta A, Pezzotti P, Biguioh RM, Bouting Mayaka G, Sobze MS, et al. Vaccine coverage and determinants of incomplete vaccination in children aged 12-23 months in Dschang, West Region, Cameroon: A cross-sectional survey during a polio outbreak. *BMC Public Health*. 2015;15(1):1–11.
  37. Seror V, Cortaredona S, Ly EY, Ndiaye S, Gaye I, Fall M, et al. Vaccination card availability and childhood immunization in Senegal. *BMC Public Health*. 2020;20(1):1–13.
  38. Porth JM, Wagner AL, Tefera YA, Boulton ML. Childhood immunization in Ethiopia: Accuracy of maternal recall compared to vaccination cards. *Vaccines*. 2019;7(2):1–12.
  39. Binyaruka P, Borghi J. Validity of parental recalls to estimate vaccination coverage: Evidence from Tanzania. *BMC Health Serv Res*. 2018;18(1):1–9.
  40. Olugbenga-Bello A, Jimoh A, Oke O, Oladejo R. Maternal characteristics and immunization status of children in north central of Nigeria. *Pan Afr Med J*. 2017;26(159):1–15.
  41. Kassahun MB, Biks GA, Teferra AS. Level of immunization coverage and associated factors among children aged 12-23 months in Lay Armachiho District, North Gondar Zone, Northwest Ethiopia: a community based cross sectional study. *BMC Res Notes*. 2015;8(1):1–10.
  42. Mohamud AN, Feleke A, Worku W, Kifle M, Sharma HR. Immunization coverage of 12-23 months old children and associated factors in Jigjiga District, Somali National Regional State, Ethiopia. *BMC Public Health*. 2014;14(1):1–9.
  43. Baguune B, Ndago JA, Adokiya MN. Immunization dropout rate and data quality among children 12-23 months of age in Ghana. *Arch Public Heal*. 2017;75(1):1–8.

- 1  
2  
3  
4  
5  
6  
7  
8  
9  
10  
11  
12  
13  
14  
15  
16  
17  
18  
19  
20  
21  
22  
23  
24  
25  
26  
27  
28  
29  
30  
31  
32  
33  
34  
35  
36  
37  
38  
39  
40  
41  
42  
43  
44  
45  
46  
47  
48  
49  
50  
51  
52  
53  
54  
55  
56  
57  
58  
59  
60
44. Chukwuemeka EEO, Aduma A, Ezeigwe FO. A Re-Interrogation of Immunization Programme in Enugu State Nigeria : Impediments and Way Forward. *J Public Manag Res*. 2019;5(1):45–61.
  45. Brown VB, Oluwatosin OA. Socio-demographic factors associated with childhood immunization uptake in Akinyele Local Government Area, Oyo State, Nigeria. *African J Med Med Sci*. 2012;41(2):161–7.
  46. Itimi K, Dienye PO, Ordinioha B. Community participation and childhood immunization coverage: A comparative study of rural and urban communities of Bayelsa State, south-south Nigeria. *Niger Med J*. 2012;53(1):21–5.
  47. Chinawa JM. Immunization dropout rates in Ihe, Awgu Local Government Area, Enugu State, South East Nigeria: A 1 year Review. *Ann Med Heal Sci Res*. 2014;4(4):642–6.
  48. World Health Organization / United Nations Children’s Fund. Increasing immunization coverage at the health facility level [Internet]. *Vaccines and Biologicals*. 2002 [cited 2020 Aug 24]. Available from: [https://apps.who.int/iris/bitstream/handle/10665/67791/WHO\\_V&B\\_02.27.pdf?sequence=1](https://apps.who.int/iris/bitstream/handle/10665/67791/WHO_V&B_02.27.pdf?sequence=1)
  49. Bangura JB, Xiao S, Qiu D, Ouyang F, Chen L. Barriers to childhood immunization in sub-Saharan Africa: A systematic review. *BMC Public Health*. 2020;20(1).
  50. Sibeudu FT, Uzochukwu BS, Onwujekwe OE. Rural–urban comparison of routine immunization utilization and its determinants in communities in Anambra States, Nigeria. *SAGE Open Med*. 2019;7:205031211882389.
  51. Anichukwu OI, Asamoah BO. The impact of maternal health care utilisation on routine immunisation coverage of children in Nigeria: A cross-sectional study. *BMJ Open*. 2019;9(6):1–11.
  52. Huldah Ijeoma N. Use of Telephone Calls in Reduction of Dropout Rate of Routine Immunization in a Tertiary Health Facility in South Eastern Nigeria. *Eur J Prev Med*. 2015;3(3):39.
  53. Gooding E, Spiliotopoulou E, Yadav P. Impact of vaccine stockouts on immunization coverage in Nigeria. *Vaccine* [Internet]. 2019;37(35):5104–10. Available from: <https://doi.org/10.1016/j.vaccine.2019.06.006>
  54. Burnett RJ, Mmoledi G, Ngcobo NJ, Dochez C, Seheri LM, Mphahlele MJ. Impact of vaccine stock-outs on infant vaccination coverage: A hospital-based survey from South Africa. *Int Health*. 2018;10(5):376–81.
  55. World Health Organization. Nigeria to avert over 160,000 deaths in children yearly, with introduction of rotavirus vaccine into immunization schedule [Internet]. *WHO Africa / Nigeria*. 2018 [cited 2020 Aug 22]. Available from: <https://www.afro.who.int/news/nigeria-avert-over-160000-deaths-children-yearly-introduction-rotavirus-vaccine-immunization>
  56. World Health Organization. Nigeria Introduces New Vaccine – PCV 10 [Internet]. *WHO Africa / Nigeria*. 2014 [cited 2020 Aug 22]. Available from: <https://www.afro.who.int/news/nigeria-introduces-new-vaccine-pcv-10#:~:text=On 22nd December 2014 the,caused by the pneumococcal bacteria>.
  57. Okeibunor JC, Onyeneho NG, Nwaorgu OC, l’Aronu N, Okoye I, Iremeka FU, et al. Prospects of using community directed intervention strategy in delivering health services among Fulani Nomads in Enugu State, Nigeria. *Int J Equity Health*. 2013;12(1):1–17.
  58. Coleman J, Black V, Thorson AE, Eriksen J. Evaluating the effect of maternal mHealth text messages on uptake of maternal and child health care services in South Africa: a multicentre cohort intervention study. *Reprod Health* [Internet]. 2020;17(1):1–9. Available from: <https://doi.org/10.1186/s12978-020-01017-3>
  59. Oladepo O, Dipeolu IO, Oladunni O. Outcome of reminder text messages intervention on completion of routine immunization in rural areas, Nigeria. *Health Promot Int*. 2020;



**Table 1:** Socio-demographic characteristics of mother and children in Enugu State, Nigeria, July 2020

| Socio-demographic characteristics                                       | Frequency<br>(N = 1,254) | Proportion<br>(%) |
|-------------------------------------------------------------------------|--------------------------|-------------------|
| <b>Mothers' age</b>                                                     |                          |                   |
| – < 20 years                                                            | 54                       | 4.3%              |
| – 20 – 29 years                                                         | 602                      | 48.0%             |
| – ≥ 30 years                                                            | 598                      | 47.7%             |
| <b>Marital status</b>                                                   |                          |                   |
| – Single                                                                | 50                       | 4.0%              |
| – Currently Married                                                     | 1127                     | 89.9%             |
| – Divorced/Widowed                                                      | 77                       | 7.1%              |
| <b>Mothers' education</b>                                               |                          |                   |
| – Primary or lower                                                      | 77                       | 6.1%              |
| – Secondary or higher                                                   | 1177                     | 93.9%             |
| <b>Mothers' working status</b>                                          |                          |                   |
| – Stay-at-home/Housewife                                                | 307                      | 24.5%             |
| – Working mom                                                           | 947                      | 75.5%             |
| <b>Religion</b>                                                         |                          |                   |
| – Christian                                                             | 1,214                    | 96.8%             |
| – Islam/Muslim                                                          | 20                       | 1.6%              |
| – African Traditional Religion                                          | 20                       | 1.6%              |
| <b>Family monthly income</b>                                            |                          |                   |
| – < N80,000 (Approx. USD 200)                                           | 960                      | 76.6%             |
| – ≥ N80,000                                                             | 294                      | 23.4%             |
| <b>Ethnic group</b>                                                     |                          |                   |
| – Igbo                                                                  | 1201                     | 95.8%             |
| – Others                                                                | 53                       | 4.2%              |
| <b>Sex/gender of child</b>                                              |                          |                   |
| – Female                                                                | 640                      | 51.0%             |
| – Male                                                                  | 614                      | 49.0%             |
| <b>Birth order of child</b>                                             |                          |                   |
| – First born                                                            | 347                      | 27.7%             |
| – Second or third                                                       | 625                      | 49.8%             |
| – Others                                                                | 282                      | 22.5%             |
| <b>Residence/Community</b>                                              |                          |                   |
| – Rural                                                                 | 503                      | 40.1%             |
| – Urban                                                                 | 751                      | 59.9%             |
| <b>Walking distance to nearest health facility</b>                      |                          |                   |
| – < 30-minutes' walk                                                    | 546                      | 43.5%             |
| – ≥ 30-minutes' walk                                                    | 708                      | 56.5%             |
| <b>Source of information on Immunization</b> (more than source applies) |                          |                   |
| – Hospital/Health facility                                              | 913                      | 72.8%             |
| – Family/friends                                                        | 789                      | 62.9%             |
| – Church/Mosque                                                         | 328                      | 26.2%             |
| – TV, Radio, and social media                                           | 193                      | 15.4%             |

**Table 2:** Immunization coverage for routine immunization (RI) antigens in Enugu State, Nigeria, July 2020

| RI Antigen                               | State-wide Coverage<br>N = 1,254<br>n, (% , [95% CI]) | Coverage in Urban<br>communities<br>N = 751<br>n, (% , [95% CI]) | Coverage in Rural<br>communities<br>N = 503<br>n, (% , [95% CI]) |
|------------------------------------------|-------------------------------------------------------|------------------------------------------------------------------|------------------------------------------------------------------|
| Antigens administered at birth           |                                                       |                                                                  |                                                                  |
| – BCG <sup>##</sup>                      | 1,136 (90.6%, [88.8% – 92.1%])                        | 741 (98.7%, [97.6% – 99.4%])                                     | 395 (78.5%, [74.7% – 82.0%])                                     |
| Antigens administered at 6 weeks         |                                                       |                                                                  |                                                                  |
| – OPV 1                                  | 1,137 (90.7%, [88.9% – 92.2%])                        | 742 (98.8%, [97.7% – 99.5%])                                     | 395 (78.5%, [74.7% – 82.0%])                                     |
| – Penta 1                                | 1,136 (90.6%, [88.8% – 92.1%])                        | 738 (98.3%, [97.1% – 99.1%])                                     | 398 (79.1%, [75.2% – 82.7%])                                     |
| Antigens administered at 10 weeks        |                                                       |                                                                  |                                                                  |
| – OPV 2                                  | 1,083 (86.4%, [84.3% – 88.2%])                        | 741 (98.7%, [97.6% – 99.4%])                                     | 342 (68.0%, [63.7% – 72.1%])                                     |
| – Penta 2                                | 1,090 (86.9%, [84.9% – 88.7%])                        | 736 (98.0%, [96.7% – 98.9%])                                     | 354 (70.4%, [66.2% – 74.3%])                                     |
| Antigens administered at 14 weeks        |                                                       |                                                                  |                                                                  |
| – OPV 3 <sup>##</sup>                    | 1,042 (83.1%, [80.9% – 85.1%])                        | 740 (98.5%, [97.4% – 99.3%])                                     | 302 (60.0%, [55.6% – 64.3%])                                     |
| – Penta 3 <sup>##</sup>                  | 1,052 (83.9%, [81.7% – 85.9%])                        | 735 (97.9%, [96.6% – 98.8%])                                     | 317 (63.0%, [58.6% – 67.3%])                                     |
| Antigens administered at 9 months        |                                                       |                                                                  |                                                                  |
| – Measles <sup>##</sup>                  | 1,101 (87.8%, [85.9% – 89.6%])                        | 716 (95.3%, [93.6% – 96.7%])                                     | 385 (76.5%, [72.6% – 80.2%])                                     |
| – Yellow fever                           | 1,081 (86.2%, [84.2% – 88.1%])                        | 720 (95.9%, [94.2% – 97.2%])                                     | 361 (71.8%, [67.6% – 75.7%])                                     |
| Supplements                              |                                                       |                                                                  |                                                                  |
| – Vitamin A                              | 1,059 (84.4%, [82.3% – 86.4%])                        | 721 (96.0%, [94.3% – 97.3%])                                     | 338 (67.2%, [62.9% – 71.3%])                                     |
| <b>Immunization status <sup>##</sup></b> |                                                       |                                                                  |                                                                  |
| – Fully immunized                        | 989 (78.9%, [76.5% – 81.1%])                          | 710 (94.5%, [92.7% – 96.1%])                                     | 279 (55.5%, [51.0% – 59.9%])                                     |
| – Partially immunized                    | 197 (15.7%, [13.7% – 17.8%])                          | 34 (4.5%, [3.2% – 6.3%])                                         | 163 (32.4%, [28.3% – 36.7%])                                     |
| – Unimmunized (Zero-dose)                | 68 (5.4%, [4.2% – 6.8%])                              | 7 (0.9%, [0.4% – 1.9%])                                          | 61 (12.1%, [9.4% – 15.3%])                                       |

<sup>##</sup> Vaccines included in the definition of immunization status (Fully immunized child vs Partially immunized vs Unimmunized)

**Table 3:** Maternal health care utilization history and knowledge of routine immunization in Enugu State, Nigeria 2020

| Characteristics                                               | Fully immunized (n = 989) | Not fully immunized (n = 265) | Crude Odds ratio (95% CI) | p-value |
|---------------------------------------------------------------|---------------------------|-------------------------------|---------------------------|---------|
| <b>MOTHERS' HEALTH CARE UTILIZATION HISTORY</b>               |                           |                               |                           |         |
| <b>Use of Skilled birth attendants (SBA)</b>                  |                           |                               |                           |         |
| – Yes (Hospital)                                              | 309 (84.7%)               | 56 (15.3%)                    | 1.70 (1.23 – 2.35)        | 0.001   |
| – No (TBA, Home delivery)                                     | 680 (76.5%)               | 209 (23.5%)                   |                           |         |
| <b>Attended ante-natal care (ANC)</b>                         |                           |                               |                           |         |
| – ≥ Four ante-natal visits                                    | 762 (77.8%)               | 217 (22.2%)                   | 0.74 (0.53 – 1.05)        | 0.091   |
| – < Four ante-natal visits                                    | 227 (82.5%)               | 48 (17.5%)                    |                           |         |
| <b>Tetanus toxoid (TT) injection during pregnancy</b>         |                           |                               |                           |         |
| – ≥ 2 TT injections                                           | 784 (79.0%)               | 209 (21.0%)                   | 1.03 (0.74 – 1.43)        | 0.888   |
| – < 2 TT injection                                            | 205 (78.5%)               | 56 (21.5%)                    |                           |         |
| <b>Attended post-natal care (PNC)</b>                         |                           |                               |                           |         |
| – Yes                                                         | 866 (89.2%)               | 105 (10.8%)                   | 10.73 (7.87 – 14.63)      | < 0.001 |
| – No                                                          | 123 (43.5%)               | 160 (56.5%)                   |                           |         |
| <b>MOTHERS' AWARENESS OF ROUTINE IMMUNIZATION</b>             |                           |                               |                           |         |
| <b>What do vaccines do to your child's body?</b>              |                           |                               |                           |         |
| – Vaccines help prevent illness                               | 937 (78.5%)               | 256 (21.5%)                   | 0.63 (0.31 – 1.30)        | 0.210   |
| – Other responses **                                          | 44 (88.0%)                | 6 (12.0%)                     |                           |         |
| – I do not know **                                            | 8 (72.7%)                 | 3 (27.3%)                     |                           |         |
| <b>Mention any disease(s) children's vaccines can prevent</b> |                           |                               |                           |         |
| – Mentioned Four (4) or more diseases                         | 481 (90.6%)               | 50 (9.4%)                     | 4.07 (2.92 – 5.68)        | < 0.001 |
| – Less than four (4) diseases **                              | 502 (70.1%)               | 214 (29.9%)                   |                           |         |
| – I do not know **                                            | 6 (85.7%)                 | 1 (14.3%)                     |                           |         |
| <b>At what age does child immunization start?</b>             |                           |                               |                           |         |
| – Just after birth                                            | 858 (84.6%)               | 156 (15.4%)                   | 4.58 (3.37 – 6.22)        | < 0.001 |
| – Stated other dates (1 week, 1 month, etc.) **               | 95 (50.3%)                | 94 (49.7%)                    |                           |         |
| – I do not know **                                            | 36 (70.6%)                | 15 (29.4%)                    |                           |         |
| <b>When does a child complete his/her immunization?</b>       |                           |                               |                           |         |
| – 9 to 15 months                                              | 930 (79.6%)               | 238 (20.4%)                   | 1.79 (1.11 – 2.88)        | 0.016   |
| – < 6 months OR > 15 months **                                | 51 (67.1%)                | 25 (32.9%)                    |                           |         |
| – I do not know **                                            | 8 (80.0%)                 | 2 (20.0%)                     |                           |         |
| <b>What is the age/schedule for each vaccine?</b>             |                           |                               |                           |         |
| – Correct schedule for three or more vaccines                 | 952 (83.3%)               | 191 (16.7%)                   | 9.97 (6.52 – 15.24)       | < 0.001 |
| – Other responses **                                          | 26 (26.3%)                | 73 (73.7%)                    |                           |         |
| – I do not know **                                            | 11 (91.7%)                | 1 (8.3%)                      |                           |         |
| <b>How many HF visits are required for full immunization?</b> |                           |                               |                           |         |
| – At least 5 or 6 visits                                      | 686 (80.4%)               | 167 (19.6%)                   | 1.33 (1.00 – 1.76)        | 0.049   |
| – < 5 visits **                                               | 183 (88.0%)               | 25 (12.0%)                    |                           |         |
| – I do not know **                                            | 120 (62.2%)               | 73 (37.8%)                    |                           |         |
| <b>Scores for Knowledge of routine immunization</b>           |                           |                               |                           |         |
| – Mean Score (± Std Dev)                                      | 10.71 (1.61)              | 9.63 (1.82)                   | 1.07 (0.83 – 1.32) ##     | < 0.001 |

\*\* These responses were combined for estimation of Crude OR. | ## Mean difference (95% CI) | Abbreviations: HF, Health Facility

**Table 4:** Determinants of immunization status of children aged 12-23 months in Enugu State, Nigeria, July 2020

| Socio-demographic Characteristics            | Reference                     | Adjusted OR | 95% CI       | p-value           |
|----------------------------------------------|-------------------------------|-------------|--------------|-------------------|
| <b>INDIVIDUAL LEVEL FACTORS</b>              |                               |             |              |                   |
| <b>Mothers' age</b>                          |                               |             |              |                   |
| – < 20 years                                 | 20 – 29 years                 | 0.17        | 0.03 – 1.06  | 0.058             |
| – ≥ 30 years                                 | 20 – 29 years                 | 0.87        | 0.57 – 1.34  | 0.534             |
| <b>Marital status</b>                        |                               |             |              |                   |
| – Single                                     | Married                       | 5.74        | 1.45 – 22.76 | <b>0.013</b>      |
| – Divorced/Widowed                           | Married                       | 1.35        | 0.60 – 3.07  | 0.468             |
| <b>Mothers' educational status</b>           |                               |             |              |                   |
| – Primary education or lower                 | Secondary education or higher | 0.64        | 0.26 – 1.56  | 0.383             |
| <b>Mother's working status</b>               |                               |             |              |                   |
| – Working mom                                | Stay-at-home/Housewife        | 1.08        | 0.63 – 1.85  | 0.327             |
| <b>Religion of family</b>                    |                               |             |              |                   |
| – Islam/Muslim                               | Christian                     | 1.53        | 0.27 – 8.62  | 0.627             |
| – African traditional                        | Christian                     | 2.21        | 0.44 – 11.13 | 0.335             |
| <b>Sex of the child</b>                      |                               |             |              |                   |
| – Male                                       | Female                        | 0.98        | 0.66 – 1.45  | 0.914             |
| <b>Child's birth order</b>                   |                               |             |              |                   |
| – Second/third child                         | First child                   | 1.52        | 0.78 – 2.98  | 0.220             |
| – Fourth and later children                  | First child                   | 1.34        | 0.48 – 3.74  | 0.577             |
| <b>MHC UTILIZATION &amp; KNOWLEDGE OF RI</b> |                               |             |              |                   |
| <b>Antenatal care (ANC)</b>                  |                               |             |              |                   |
| – < 4 ANC visits                             | ≥ 4 ANC visits                | 1.52        | 0.71 – 3.22  | 0.472             |
| <b>Maternal tetanus toxoid (TT)</b>          |                               |             |              |                   |
| – < 2 doses                                  | ≥ 2 doses                     | 0.93        | 0.41 – 2.10  | 0.864             |
| <b>Use of Skilled birth attendants (SBA)</b> |                               |             |              |                   |
| – No                                         | Yes                           | 1.93        | 1.24 – 2.99  | <b>0.003</b>      |
| <b>Postnatal care (PNC)</b>                  |                               |             |              |                   |
| – No                                         | Yes                           | 6.53        | 4.17 – 10.22 | <b>&lt; 0.001</b> |
| <b>Mothers' knowledge of RI</b>              |                               |             |              |                   |
| – Poor                                       | Satisfactory                  | 1.76        | 1.09 – 2.87  | <b>0.022</b>      |
| <b>COMMUNITY LEVEL FACTORS</b>               |                               |             |              |                   |
| <b>Area of residence</b>                     |                               |             |              |                   |
| – Rural                                      | Urban                         | 7.49        | 4.84 – 11.59 | <b>&lt; 0.001</b> |
| <b>Family monthly income level</b>           |                               |             |              |                   |
| – < N80,000 (Approx. USD 200)                | ≥ N80,000 (Approx. USD 200)   | 1.56        | 1.17 – 2.81  | <b>&lt; 0.001</b> |
| <b>Distance to nearest vaccination point</b> |                               |             |              |                   |
| – ≥ 30 minutes' walk                         | < 30 minutes' walk            | 2.15        | 1.31 – 3.52  | <b>0.003</b>      |

**Figure 1:** Study Area: Enugu East LGA, Enugu North LGA, Ezeagu LGA, and Udenu LGA in Enugu State, Nigeria.

(Insert shows the location of Enugu State (coloured burgundy)).

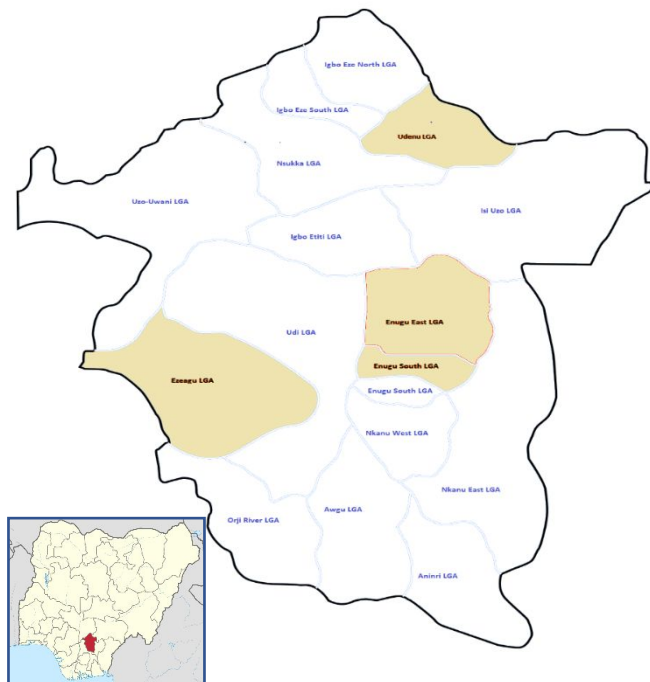

Source: [https://www.researchgate.net/figure/Map-of-Enugu-State-showing-the-locations-of-the-17-local-government-areas-Ukabia-2010\\_fig4\\_261949564](https://www.researchgate.net/figure/Map-of-Enugu-State-showing-the-locations-of-the-17-local-government-areas-Ukabia-2010_fig4_261949564).

view only

**STROBE 2007 (v4) Statement—Checklist of items that should be included in reports of *cross-sectional studies***

| Section/Topic                | Item # | Recommendation                                                                                                                                                                       | Reported on page # |
|------------------------------|--------|--------------------------------------------------------------------------------------------------------------------------------------------------------------------------------------|--------------------|
| <b>Title and abstract</b>    | 1      | (a) Indicate the study's design with a commonly used term in the title or the abstract                                                                                               | 1                  |
|                              |        | (b) Provide in the abstract an informative and balanced summary of what was done and what was found                                                                                  | 1                  |
| <b>Introduction</b>          |        |                                                                                                                                                                                      |                    |
| Background/rationale         | 2      | Explain the scientific background and rationale for the investigation being reported                                                                                                 | 2,3                |
| Objectives                   | 3      | State specific objectives, including any prespecified hypotheses                                                                                                                     | 3                  |
| <b>Methods</b>               |        |                                                                                                                                                                                      |                    |
| Study design                 | 4      | Present key elements of study design early in the paper                                                                                                                              | 3                  |
| Setting                      | 5      | Describe the setting, locations, and relevant dates, including periods of recruitment, exposure, follow-up, and data collection                                                      | 3                  |
| Participants                 | 6      | (a) Give the eligibility criteria, and the sources and methods of selection of participants                                                                                          | 4                  |
| Variables                    | 7      | Clearly define all outcomes, exposures, predictors, potential confounders, and effect modifiers. Give diagnostic criteria, if applicable                                             | 4                  |
| Data sources/<br>measurement | 8*     | For each variable of interest, give sources of data and details of methods of assessment (measurement). Describe comparability of assessment methods if there is more than one group | 4                  |
| Bias                         | 9      | Describe any efforts to address potential sources of bias                                                                                                                            | 4                  |
| Study size                   | 10     | Explain how the study size was arrived at                                                                                                                                            | 3,4                |
| Quantitative variables       | 11     | Explain how quantitative variables were handled in the analyses. If applicable, describe which groupings were chosen and why                                                         | 4                  |
| Statistical methods          | 12     | (a) Describe all statistical methods, including those used to control for confounding                                                                                                | 5                  |
|                              |        | (b) Describe any methods used to examine subgroups and interactions                                                                                                                  | 5                  |
|                              |        | (c) Explain how missing data were addressed                                                                                                                                          | 5                  |
|                              |        | (d) If applicable, describe analytical methods taking account of sampling strategy                                                                                                   | 5                  |
|                              |        | (e) Describe any sensitivity analyses                                                                                                                                                | 5                  |
| <b>Results</b>               |        |                                                                                                                                                                                      |                    |

|                          |     |                                                                                                                                                                                                              |                |
|--------------------------|-----|--------------------------------------------------------------------------------------------------------------------------------------------------------------------------------------------------------------|----------------|
| Participants             | 13* | (a) Report numbers of individuals at each stage of study—eg numbers potentially eligible, examined for eligibility, confirmed eligible, included in the study, completing follow-up, and analysed            | 5              |
|                          |     | (b) Give reasons for non-participation at each stage                                                                                                                                                         | Not applicable |
|                          |     | (c) Consider use of a flow diagram                                                                                                                                                                           | Not applicable |
| Descriptive data         | 14* | (a) Give characteristics of study participants (eg demographic, clinical, social) and information on exposures and potential confounders                                                                     | 5              |
|                          |     | (b) Indicate number of participants with missing data for each variable of interest                                                                                                                          | Not applicable |
| Outcome data             | 15* | Report numbers of outcome events or summary measures                                                                                                                                                         | 5              |
| Main results             | 16  | (a) Give unadjusted estimates and, if applicable, confounder-adjusted estimates and their precision (eg, 95% confidence interval). Make clear which confounders were adjusted for and why they were included | 5              |
|                          |     | (b) Report category boundaries when continuous variables were categorized                                                                                                                                    | 5              |
|                          |     | (c) If relevant, consider translating estimates of relative risk into absolute risk for a meaningful time period                                                                                             |                |
| Other analyses           | 17  | Report other analyses done—eg analyses of subgroups and interactions, and sensitivity analyses                                                                                                               | 5              |
| <b>Discussion</b>        |     |                                                                                                                                                                                                              |                |
| Key results              | 18  | Summarise key results with reference to study objectives                                                                                                                                                     | 6              |
| Limitations              | 19  | Discuss limitations of the study, taking into account sources of potential bias or imprecision. Discuss both direction and magnitude of any potential bias                                                   | 6,7            |
| Interpretation           | 20  | Give a cautious overall interpretation of results considering objectives, limitations, multiplicity of analyses, results from similar studies, and other relevant evidence                                   | 6              |
| Generalisability         | 21  | Discuss the generalisability (external validity) of the study results                                                                                                                                        | 7              |
| <b>Other information</b> |     |                                                                                                                                                                                                              |                |
| Funding                  | 22  | Give the source of funding and the role of the funders for the present study and, if applicable, for the original study on which the present article is based                                                | 9              |

\*Give information separately for cases and controls in case-control studies and, if applicable, for exposed and unexposed groups in cohort and cross-sectional studies.

**Note:** An Explanation and Elaboration article discusses each checklist item and gives methodological background and published examples of transparent reporting. The STROBE checklist is best used in conjunction with this article (freely available on the Web sites of PLoS Medicine at <http://www.plosmedicine.org/>, Annals of Internal Medicine at <http://www.annals.org/>, and Epidemiology at <http://www.epidem.com/>). Information on the STROBE Initiative is available at [www.strobe-statement.org](http://www.strobe-statement.org).



# BMJ Open

## Determinants of incomplete immunization in children aged 12 to 23 months at sub-national level, Nigeria – a cross-sectional study

|                                 |                                                                                                                                                                                                                                                                                                                                                                                                                                                                                                                                                                  |
|---------------------------------|------------------------------------------------------------------------------------------------------------------------------------------------------------------------------------------------------------------------------------------------------------------------------------------------------------------------------------------------------------------------------------------------------------------------------------------------------------------------------------------------------------------------------------------------------------------|
| Journal:                        | <i>BMJ Open</i>                                                                                                                                                                                                                                                                                                                                                                                                                                                                                                                                                  |
| Manuscript ID                   | bmjopen-2020-047445.R1                                                                                                                                                                                                                                                                                                                                                                                                                                                                                                                                           |
| Article Type:                   | Original research                                                                                                                                                                                                                                                                                                                                                                                                                                                                                                                                                |
| Date Submitted by the Author:   | 10-Apr-2021                                                                                                                                                                                                                                                                                                                                                                                                                                                                                                                                                      |
| Complete List of Authors:       | Eze, Paul; Penn State - Main Campus, Health Policy and Administration<br>Agu, Ujunwa; Enugu State University Teaching Hospital, Parklane, Enugu, Department of Paediatrics<br>Aniebo, Chioma; Enugu State University Teaching Hospital, Parklane, Enugu, Department of Paediatrics<br>Agu, Sergius; University of Nigeria Teaching Hospital, Department of Paediatrics<br>Lawani, Lucky; University of Toronto, Institute of Health Policy, Management & Evaluation<br>Acharya, Yubraj; Penn State - Main Campus, Department of Health Policy and Administration |
| <b>Primary Subject Heading</b>: | Public health                                                                                                                                                                                                                                                                                                                                                                                                                                                                                                                                                    |
| Secondary Subject Heading:      | Global health, Paediatrics                                                                                                                                                                                                                                                                                                                                                                                                                                                                                                                                       |
| Keywords:                       | Community child health < PAEDIATRICS, International health services < HEALTH SERVICES ADMINISTRATION & MANAGEMENT, Public health < INFECTIOUS DISEASES                                                                                                                                                                                                                                                                                                                                                                                                           |
|                                 |                                                                                                                                                                                                                                                                                                                                                                                                                                                                                                                                                                  |

SCHOLARONE™  
Manuscripts

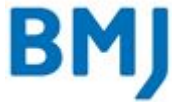

I, the Submitting Author has the right to grant and does grant on behalf of all authors of the Work (as defined in the below author licence), an exclusive licence and/or a non-exclusive licence for contributions from authors who are: i) UK Crown employees; ii) where BMJ has agreed a CC-BY licence shall apply, and/or iii) in accordance with the terms applicable for US Federal Government officers or employees acting as part of their official duties; on a worldwide, perpetual, irrevocable, royalty-free basis to BMJ Publishing Group Ltd ("BMJ") its licensees and where the relevant Journal is co-owned by BMJ to the co-owners of the Journal, to publish the Work in this journal and any other BMJ products and to exploit all rights, as set out in our [licence](#).

The Submitting Author accepts and understands that any supply made under these terms is made by BMJ to the Submitting Author unless you are acting as an employee on behalf of your employer or a postgraduate student of an affiliated institution which is paying any applicable article publishing charge ("APC") for Open Access articles. Where the Submitting Author wishes to make the Work available on an Open Access basis (and intends to pay the relevant APC), the terms of reuse of such Open Access shall be governed by a Creative Commons licence – details of these licences and which [Creative Commons](#) licence will apply to this Work are set out in our licence referred to above.

Other than as permitted in any relevant BMJ Author's Self Archiving Policies, I confirm this Work has not been accepted for publication elsewhere, is not being considered for publication elsewhere and does not duplicate material already published. I confirm all authors consent to publication of this Work and authorise the granting of this licence.

1 Research Article

## 2 **Determinants of incomplete immunization in children aged 12 to 23 months at sub-national** 3 **level, Nigeria – a cross-sectional study**

4 Paul Eze<sup>1\*</sup>, Ujunwa Justina Agu<sup>2</sup>, Chioma Lynda Aniebo<sup>2</sup>, Sergius Alex Agu<sup>3</sup>, Lucky Osaheni Lawani<sup>4</sup>, and Yubraj Acharya<sup>1</sup>

- 5  
6  
7  
8 1. Department of Health Policy & Administration, Penn State University, University Park, PA 16802, USA  
9 2. Department of Paediatrics, Enugu State University Teaching Hospital, Parklane, Enugu, Nigeria  
10 3. Department of Paediatrics, University of Nigeria Teaching Hospital, Ituku-Ozalla, Enugu, Nigeria  
11 4. Institute of Health Policy, Management & Evaluation, University of Toronto, Toronto, ON M5T 3M6, Canada  
12

13 \*Corresponding Author

14 Email: [peze@psu.edu](mailto:peze@psu.edu)

15 Tel. +1 223 216 1640

16  
17  
18 Email address & ORCID number of co-authors:

- 19 1. Dr. Paul Eze: [peze@psu.edu](mailto:peze@psu.edu) | 0000-0001-7202-8676  
20 2. Dr. Ujunwa Justina Agu: [uagu247@gmail.com](mailto:uagu247@gmail.com)  
21 3. Dr. Chioma Lynda Aniebo: [drkaniebo@gmail.com](mailto:drkaniebo@gmail.com)  
22 4. Dr. Sergius Alex Agu: [agusergiusalex@gmail.com](mailto:agusergiusalex@gmail.com) | 0000-0002-0566-2068  
23 5. Dr. Lucky Osaheni Lawani: [osaheni.lawani@mail.utoronto.ca](mailto:osaheni.lawani@mail.utoronto.ca) | 0000-0002-5350-7441  
24 6. Professor Yubraj Acharya: [yua36@psu.edu](mailto:yua36@psu.edu) | 0000-0002-9003-636X  
25  
26  
27  
28  
29  
30

### 31 **Word Count**

32 **Abstract:** 292 words (Max, 300) | **Text:** 3,620 words (Max, 4,000) | **Table/figures:** 4 + 1 (Max, 5) | **References:** 58 (Max, NA)

### 33 **Abstract**

34  
35  
36  
37 **Objectives:** National immunization coverage rate masks sub-national immunization coverage gaps at the state and local  
38 district levels. The study was performed to determine the socio-demographic determinants of incomplete immunization in  
39 children at a sub-national level.

40  
41 **Design:** Cross-sectional study using the World Health Organization sampling method (2018 Reference Manual).

42 **Setting:** Fifty randomly selected clusters (wards) in four districts (two urban and two rural) in Enugu State, Nigeria.

43  
44 **Participants:** 1,254 mothers of children aged 12-23 months in July 2020.

45  
46 **Primary and secondary outcome measures:** Fully immunized children and not fully immunized children.

47  
48 **Results:** Full immunization coverage (FIC) rate in Enugu State was 78.9% (95% CI = 76.5% – 81.1%). However, stark  
49 difference exists in FIC rate in urban versus rural districts. Only 55.5% of children in rural communities are fully immunized  
50 compared to 94.5% in urban communities. Significant predictors of incomplete immunization are: children of single mothers  
51 (aOR = 5.74, 95% CI = 1.45 – 22.76), children delivered without skilled birth attendant present (aOR = 1.93, 95% CI = 1.24 –  
52 2.99), children of mothers who did not receive postnatal care (aOR = 6.53, 95% CI = 4.17 – 10.22), children of mothers with  
53 poor knowledge of routine immunization (aOR = 1.76, 95% CI = 1.09 – 2.87), dwelling in rural district (aOR = 7.49, 95% CI =  
54 4.84 – 11.59), low-income families (aOR = 1.56, 95% CI = 1.17 – 2.81), and living further than 30 minutes from the nearest  
55 vaccination facility (aOR = 2.15, 95% CI = 1.31 – 3.52).  
56  
57  
58  
59  
60

1 **Conclusions:** Although the proportion of fully-immunized children in Enugu State is low, it is significantly lower in rural  
2 districts. Study findings suggest the need for innovative solutions to improve geographical accessibility and reinforce the  
3 importance of reporting vaccination coverage at local district level to identify districts for more targeted interventions.  
4  
5  
6  
7

### 8 **Strengths and limitations of this study**

9

- 10 ◦ The estimates presented in the study for the sub-national level are potentially more accurate than previous  
11 estimates.
- 12
- 13 ◦ We adhered to the guidelines in WHO Vaccination Coverage Cluster Surveys Reference Manual 2019, thus enabling  
14 greater comparability with future studies using the same method.
- 15
- 16
- 17 ◦ Due to the observational cross-sectional design, we cannot establish a causal relationship between the  
18 determinants and vaccination.
- 19
- 20 ◦ This study considerably relied on maternal recall which can lead to overestimation or underestimation of  
21 immunization coverage estimates.
- 22
- 23
- 24 ◦ We were unable to access pockets of historically healthcare-marginalized population in one of the settlements due  
25 to security concerns.
- 26
- 27
- 28

29 **Keywords:** Routine immunization, Children, Determinants, Nigeria  
30  
31  
32  
33

### 34 **Introduction**

35 Immunization, defined as the process that makes a person immune or resistant to an infectious disease, typically by the  
36 administration of a vaccine, is one of the most effective interventions in contemporary public health practice [1,2]. Several  
37 cost-benefits analyses have consistently placed immunization as one of the most cost-effective health interventions with  
38 huge direct and societal benefits [3–8]. Immunization saves about 2-3 million lives every year [1,2], and has successfully led  
39 to the elimination of a number of vaccine-preventable diseases in some high-income countries, including polio, diphtheria,  
40 and pertussis [3,9]. Indeed, childhood immunization has had a remarkable impact on child morbidity and mortality  
41 worldwide with immense positive multiplier effects on the larger communities [3,5,9].  
42  
43

44 Nigeria is one of the 10 countries (Angola, Brazil, the Democratic Republic of the Congo, Ethiopia, India, Indonesia, Mexico,  
45 Nigeria, Pakistan, and the Philippines) that account for over 60% of the children who did not get DTP3 in 2019 [1]. DTP3  
46 coverage is an indicator of how well countries are providing routine immunization services [2]. In 2017, about 20% of the  
47 world's infants with incomplete DPT immunization lived in Nigeria [10]. Three million of the estimated 8.9 million infants in  
48 the WHO African Region who did not receive any measles containing vaccine in 2015 live in Nigeria [11]. Hence, Nigeria  
49 accounts for nearly 40% of the 28,279 confirmed measles cases reported from the WHO African Region in 2016 [12].  
50  
51

52 The Expanded Program on Immunization in Nigeria, created in 1979, had a significant impact during the first few years with  
53 immunization coverage peaking at 81.5% in 1990 [13–15]. Immunization coverage plummeted to 12.3% in 2003 [15], due to a  
54 myriad of factors including low government commitment to EPI policy, over-centralization in the administration of EPI at the  
55 federal level, collapse of the primary healthcare service upon which EPI services were delivered, and vaccination refusal  
56 mostly due to religious beliefs in the northern part of the country [15]. Several strategies were deployed in subsequent years  
57  
58  
59  
60

1 to address the low immunization coverage, including routine immunization strengthening, supplemental immunization  
2 activities, global positioning system tracker, and several community-level interventions [16]. Despite these efforts,  
3 preliminary results of the 2019 National Nutrition and Health Survey suggests a national DTP3 coverage of 67% [17].  
4 However, even the low national immunization coverage rates mask subnational immunization coverage gaps at the state and  
5 local district levels [18]. For example, immunization coverage ranged from 5% to 48% across states in northern Nigeria in the  
6 2018 National Demographic and Health Survey (DHS) [19].  
7  
8

9 The Immunization Agenda 2030 (IA2030) is a global strategy led by the World Health Organization (WHO) to ensure every  
10 child is protected by full immunization, regardless of location, age, socioeconomic status, or gender-related barriers by 2030  
11 [20]. Despite overall improvements in immunization coverage at the national level [21], geographic variations in the  
12 immunization coverage persists at most sub-national and district levels [18]. Achieving geographical parity, however,  
13 depends on capturing and understanding local patterns of coverage required to provide optimal, child-focused vaccine  
14 delivery services [1,18]. Also, while nationally representative surveys such as the Demographic and Health Survey (DHS) and  
15 Multiple Indicator Cluster Survey (MICS) have a standardized data collection procedures across countries that is also  
16 consistent over time [22], presenting immunization coverage at national levels fails to capture the all-important local  
17 patterns of coverage required to properly fine-tune vaccine delivery services. Furthermore, relying on sub-national  
18 administrative data for assessing immunization system performance and tracking progress is often fraught with limitations  
19 such as missing data and poor data quality [18,23].  
20  
21

22 This study seeks to identify determinants of incomplete immunization at the sub-national level using Enugu State as point of  
23 focus. Enugu State has a high number of unimmunized children[24], and has the lowest proportion of children with complete  
24 immunization in the southeast region [25]. Hence, employing the World Health Organization multi-stage sampling methods  
25 for community survey [26], this study aims to identify the sociodemographic determinants of incomplete immunization in  
26 children aged 12 to 23 months at a sub-national and local level. Our findings could help tailor strategies and operational  
27 plans to address immunization gaps and reach children in every district with life-saving vaccines.  
28  
29  
30  
31

## 32 **Methods**

33  
34 This was a community-based cross-sectional survey of mothers of children 12–23 months old residing in Enugu State in July  
35 2020. At the time of the study, all children 12–23 months old were considered eligible for sampling. The Strengthening the  
36 Reporting of Observational Studies in Epidemiology (STROBE) guidelines were used to ensure appropriate reporting of our  
37 study's design, conduct, and findings [27].  
38

### 39 **Study setting**

40  
41 Nigeria is the most populous country in Africa and the sixth most populous in the world [28]. She is located in Western Africa  
42 and is divided into six geopolitical regions: Northeast, Northwest, Northcentral, Southsouth, Southeast and Southwest. She  
43 has 36 states – the second administrative division, and a federal capital territory in Abuja. Each state is further divided into  
44 smaller administrative units called local government areas (LGA) and each LGA is further divided into wards.  
45

46 Enugu State is one of the 36 states in Nigeria (**Figure 1**) and one of the five states that make up the southeast geopolitical  
47 region in the country. Enugu State is further divided into 17 LGAs, four of which are predominantly urban (Enugu East, Enugu  
48 North, Enugu South, and Nsukka) and the rest are predominantly rural. Enugu State's 2020 projected population is 4,769,916,  
49 with most of the population living in urban centres in Enugu and Nsukka [29,30].  
50

### 51 **Sample size**

52  
53 Using steps described in the WHO Vaccination Coverage Cluster Surveys Reference Manual 2019 [26], we determined the  
54 sample size using immunization coverage of 36.0% obtained for Enugu State in the most recent 2018 Nigeria DHS [25],  
55 significance level of 5.0%, precision of 5.0%, design effect of 2.5 [31], and an inflation of 15% (to account for non-response).  
56 The calculated minimum sample size was 1,183 which was increased to 1,250 to boost the power of the study.  
57  
58  
59  
60

## 1 **Sampling procedure**

2  
3 A three-stage sampling technique was used. In the first stage, a simple random sampling technique by balloting was used to  
4 select four local government areas, two each from the urban and rural areas of the state. In the second stage, a total of 50  
5 clusters based on probability-proportional-to-size of the population; 15 clusters from Enugu East LGA, 15 clusters from Enugu  
6 North LGA, and 10 clusters each from Ezeagu LGA and Udenu LGA were randomly selected by balloting. In the third stage, we  
7 selected 25 households in each of the 50 clusters (ward) selected in the second stage. The first household in each cluster was  
8 selected randomly and subsequent households were selected contiguously in the right direction until the required number of  
9 households for that cluster was achieved. From each selected household, one eligible child was selected. If a selected  
10 household had more than one eligible child, the youngest child older than 12 months was selected. If a selected household  
11 had no eligible child, the next contiguous household was visited, and one eligible child was selected.  
12  
13

## 14 **Data collection**

15  
16 Data were collected by a team of 14 trained community health workers (CHW) using structured pre-tested interviewer-  
17 administered questionnaires. The questionnaire was constructed from a review of the available literature on immunization  
18 surveys in similar contexts [32–34], and tested for acceptability and logical structure in a sample of 20 mothers before the  
19 study. The team was trained on the study's objectives, interpreting, and extracting data from health cards/vaccination  
20 certificates, sampling techniques, walking distance estimation using Google® Maps mobile app, ethical issues including the  
21 process of taking informed verbal consent, and administration of the questionnaire. The questionnaire was administered in  
22 Igbo (the local language) except for a few non-Igbo speakers who were administered the questionnaire in English. Questions  
23 were directed to the mothers, and only the mothers' responses were recorded.  
24  
25

26 Data collected include socio-demographic characteristics of mothers and children including maternal healthcare (MHC)  
27 utilization [ante-natal care (ANC), skilled birth attendant (SBA) present at birth, and post-natal care (PNC)], knowledge of  
28 mothers regarding RI, immunization status of children, and reasons for any non-vaccination. If the immunization card was  
29 available, immunization information of each inoculation received by the child was recorded. If a child had never received an  
30 immunization card or the mother was unable to present the immunization card to the interviewer, the immunization  
31 data/information for the child was based on the mother's report.  
32

33 Google® Map mobile app was used on smartphones to estimate the walking distance from each study participant's house to  
34 the nearest vaccination center in all but four clusters (in Ezeagu LGA). In these four clusters, we first identified the nearest  
35 routine childhood vaccination point in each cluster and then estimated the walking distance from this nearest vaccination  
36 facility to each household included in the study. To evaluate mothers' knowledge of routine immunization and vaccine-  
37 preventable diseases, the interviewers asked questions on the correct purpose of immunization, different vaccine-  
38 preventable diseases, the correct age for receiving the vaccines, and the total number of visits required to complete the  
39 recommended vaccination for the child. Responses were evaluated as per the National Primary Healthcare Development  
40 Agency routine immunization schedule [35]. Correct responses were scored 2 points, incorrect responses 1 point, 'I do not  
41 know' 0 (zero) point.  
42  
43  
44

## 45 **Outcome variable**

46 Children were categorized as fully immunized, partially immunized, or un-immunized (zero-dose) based on the types and  
47 doses of antigens received. A "fully immunized child" was defined as a child who had received one dose of BCG, three doses  
48 of OPV (excluding OPV given at birth), three doses of Pentavalent vaccine, and one dose of measles vaccine by 12 months of  
49 age; a partially immunized child was defined as a child who missed at least any one of the above doses; while an "un-  
50 immunized" or "zero-dose" child was defined as a child who had not received any vaccine by 12 months of age [36].  
51 Incomplete immunization, in this study, includes partially immunized children and unimmunized (zero-dose) children.  
52 Immunization status was based on mothers' recall and immunization card record (that is, where the mother presents an  
53 immunization card, the child's immunization status is based on records in the card, but where an immunization card is not  
54 available, the immunization status is based on mothers' recall) as recommended by the World Health Organization [26]. This  
55 method has been used in a number of similar studies [32,37], and proven to be a reliable assessment of immunization  
56  
57  
58  
59  
60

1 coverage [38–40]. Vitamin A and Yellow fever vaccines were not included in determining complete immunization status for  
2 this study.  
3

#### 4 **Data analysis**

5  
6 Data were entered into Microsoft Excel® (Microsoft, Redmond, WA, USA), cleaned and transferred to IBM SPSS® version 27.0  
7 (IBM, Armonk, NY, USA) for statistical analyses. Frequency and percentage were used to describe the data, and Chi-square  
8 test was used to test for statistical significance. T-test was used to assess for statistical difference in the mean scores for  
9 knowledge of routine immunization. Multivariate logistics regression analyses were performed to estimate adjusted odds  
10 ratios with 95 % Confidence Interval (CI) while adjusting for mothers age, marital status, mothers educational status, mothers  
11 occupation, religion, ethnic/tribal group, family monthly income, sex of the index child, and source of information on  
12 immunization. Aggregate scores for questions on awareness of routine immunization were dichotomized into satisfactory  
13 knowledge (10 points and above) and poor knowledge (less than 10 points) prior to inclusion in the regression model. P<0.05  
14 was used to define statistical significance, and all tests were two-tailed.  
15

#### 16 **Patient and Public Involvement**

17  
18 No patients were involved in developing the research question and study design or in the implementation of the study  
19 design, the interpretation of the results and writing of the manuscript. There are no plans to share the study with patients.  
20  
21  
22  
23

## 24 **Results**

### 25 **Socio-demographic characteristics of mothers and children**

26  
27 A total of 1,254 distinct mothers were interviewed with mean (SD) age of 28.7 (4.3) years. Forty-eight percent of mothers  
28 were aged 20 – 29 years old, about 89.9% were married, 93.9% had at least secondary education or higher, and about three-  
29 quarters (75.5%) were employed. The mean (SD) age of the children was 16.8 (3.3) months, the age ranged from 12 to 23  
30 months, and about half (51.0%) were girls – **Table 1**.  
31

### 32 **Full immunization coverage (FIC) rate**

33  
34 The FIC rate in Enugu State was 78.9% (95% CI = 76.5% – 81.1%), the partially immunized rate was 15.7% (95% CI = 13.7% –  
35 17.8%), while the unimmunized (zero-dose) rate was 5.4% (95% CI = 4.2% – 6.8%) – **Table 2**. Vaccination coverage rates for  
36 Yellow fever vaccine and Vitamin A supplement were 86.2% (95% CI = 84.2% – 88.1%) and 84.4% (82.3% – 86.4%),  
37 respectively. DPT3 vaccination coverage rate, which is Pentavalent-3 coverage rate in this study, was 83.9% (95% CI = 81.7% –  
38 85.9%).  
39  
40

41 Immunization coverage rates differed based on the rurality-urbanity of communities in the state. FIC rate was 94.5% (95% CI  
42 = 92.7% – 96.1%) in urban communities and 55.5% (95% CI = 51.0% – 59.9%) in rural communities. In both urban and rural  
43 communities, the proportion of children vaccinated with antigens given at birth and six weeks of age were more than the  
44 proportions of children vaccinated with antigens given at later ages.  
45

46  
47 Of the 1,254 children, 578 possessed immunization cards, indicating an immunization card retention rate of 48.7% (95% CI =  
48 45.9% - 51.6%). About two-fifth of unvaccinated (zero-dose) children were not vaccinated because vaccination sites were too  
49 far while another two-fifth reported absence of vaccines in the health facility (**Supplement 1**).  
50

### 51 **Determinants of immunization status**

52  
53 **Table 3** shows results from a bivariate analysis of maternal health care utilization history and knowledge of routine  
54 immunization. Use of skilled birth attendants (SBA) during delivery of index child, and reception of postnatal care (at least  
55 one postnatal visit) were statistically significant predictors of incomplete immunization. Student t-test we used for the  
56 comparison of mean score of knowledge of routine immunization demonstrated that insufficient knowledge of routine  
57 immunization was also statistically significantly associated with incomplete immunization.  
58  
59  
60



Multivariate logistic regression model was statistically significant,  $\chi^2(25) = 24.217$ ,  $p = 0.002$ . The model explained 57.0% (Nagelkerke  $R^2$ ) of the variance in immunization status and correctly classified 90.7% of cases. Single mothers (aOR = 5.74, 95% CI = 1.45 – 22.76), mothers who delivered without SBA (aOR = 1.93, 95% CI = 1.24 – 2.99), mothers who did not receive any postnatal care (aOR = 6.53, 95% CI = 4.17 – 10.22), and mothers with poor knowledge of routine immunization (aOR = 1.76, 95% CI = 1.09 – 2.87) were significant predictors of incomplete immunization – **Table 4**. Community level predictors for incomplete immunization were rural community (aOR = 7.49, 95% CI = 4.84 – 11.59), low-income households (aOR = 1.56, 95% CI = 1.17 – 2.81), and living further than 30 minutes walking distance from the nearest vaccination facility (aOR = 2.15, 95% CI = 1.31 – 3.52).

## Discussion

This study evaluated immunization coverage data in urban and rural areas of Enugu State and offers a close-up assessment of sociodemographic determinants of incomplete immunization at the sub-national and local level. There are four main findings from this study. First, this assessment of immunization coverage of children aged 12-23 months in 50 randomly selected wards in rural and urban districts (LGA) in Enugu State found FIC rate in Enugu state to be low, below the RED's subnational target of 80% immunization coverage. While the FIC rate in this study is higher than FIC rates reported in other sub-regions in Nigeria [33,41], and Ethiopia [42,43], it is lower than FIC rates reported in Cameroon [37], and Ghana [44]. The FIC rate is also substantially different from the FIC rate reported for Enugu State (36.4%) in the latest (2018) Nigeria DHS [25]. This could possibly be due some improvements in routine immunization coverage utilization likely occurred over the period (recall the 2018 DHS was conducted in 2017) driven by recent State Government efforts to boost vaccination coverage in the state [24], and differences in the sampling approach between the two surveys [25,26]. About one in five (21.1%) children aged 12-23 months in the state were not fully immunized. This suggests that even after almost two decades of implementing the RED strategy in Nigeria, some states in the southern region with purportedly high immunization coverage [14], did not yet meet the (RED's) subnational immunization target. This partially explains why huge investments in immunization activities have had minimal impact on the incidence of vaccine preventable diseases in Enugu State [45].

Secondly, further analysis based on rurality of residence reveals stark disparity in the FIC rate between urban communities and rural communities. Urban communities had a substantially higher FIC rate (94.5%) than rural communities (55.5%). This observation is consistent with findings in other sub-regions in Nigeria [41,46], and Ethiopia [42,43], but differs with findings in Bayelsa State, Nigeria where immunization coverage was higher in the rural community than in the urban community [47]. Our data show that almost half of infants in rural communities miss out on at least one of the critical life-saving BCG, Pentavalent, OPV, and Measles vaccines. This finding underscores the importance of monitoring data at sub-district levels to identify vaccination gaps and tailor operational strategies accordingly.

Thirdly, the low DPT-3 coverage in rural communities (63.0%) points to gaps in routine immunization delivery in those communities and is consistent with a study conducted in another rural community in Enugu[48]. Furthermore, the immunization dropout rate in both urban and rural communities is low, below the 10% cut-off recommended by WHO [49]. The low immunization dropout rate amidst low DPT-1 coverage in rural communities suggests that access to routine immunization services in these contexts remains a problem [49], as previous studies have argued[48]. There are many factors responsible for the rural-urban differences in access. For example, vaccination points are more geographically accessible to families in urban communities than in rural communities [10,50,51], rural communities incur higher travel costs to reach vaccination points[51], and rural communities are less aware of the importance of immunization[10,41].

Finally, predictors of incomplete immunization at the district level identified in this study include marital status, MHC utilization, poor knowledge of routine immunization, poor family income, and geographical accessibility. Children of single mothers are less likely to be fully immunized compared to married mothers. Married mothers are more financially stable and most likely to discuss the health needs of their children, including immunization [44,50]. Also, stigma, psychological trauma, and hardship associated with single motherhood in these context negatively impacts access to health and vaccination [44,50]. MHC utilization also significantly predicts incomplete immunization. Mothers who give birth using SBA are more likely to have them fully immunized than mothers who did not use SBA. Likewise, mothers who receive PNC care are more

likely to have their children fully immunized. This is consistent with several studies in other LMICs that demonstrate that increased health communications on immunization during MHC utilization significantly impacts childhood immunization [50,52]. However, given that the sequence of MHC utilization is ANC-SBA-PNC, the absence of a significant effect for ANC in this study does not imply that adequate ANC attendance does not impact routine immunization. Instead, our data suggest that other factors such as accessibility to health facilities could have a stronger impact on routine immunization than adequately attending ANC [53].

### Strengths and limitations

Our study extends the body of knowledge on immunization uptake in rural areas vis-à-vis urban areas at the subnational level, our results can be generalized to similar contexts in Nigeria and beyond and provides important evidence to policymakers and program managers for improving immunization coverage. However, our study is not without limitations. First, the effects of health system factors including vaccine availability, health care personnel, and logistics [54,55], which are known to influence uptake of immunization coverage were not adequately explored. Also, paternal factors that may influence the completion of immunization were not also evaluated [50]. However, the primary goal of this study was not to assess the effect of these factors. Secondly, new vaccines recently introduced into the Nigeria routine immunization schedule (specifically, Rotavirus vaccine and Pneumococcal Conjugate Vaccine (PCV)) were not explored [56,57]. Thirdly, although maternal recall has been shown to be a reliable estimate of maternal recall in Senegal, Ethiopia, and Tanzania [38–40], there is little evidence that it is a reliable coverage measure in Nigeria. A similar study in Osun State showed that agreement between the mothers' recall and immunization card assessment was low [33]. This (maternal recall) could have also biased our estimates. Finally, pockets of hard-to-reach Fulani settlements that have been shown to have poor immunization coverage were not included in our sample [58]. Due to the deteriorating security situation in the country and the absence of security assurances, we could not send data collectors to these settlements.

### Policy implications

Our study findings have policy implications for vaccination delivery in low- and middle-income countries laboring to improve national and subnational immunization coverage. Innovative solutions to improve geographical accessibility are undoubtedly needed to achieve IA2030 targets at local levels. Also, our study found that mothers who used MHC services were significantly more likely to have full immunized children suggesting that improving MHC utilization, especially in underserved rural communities, might be an effective strategy in achieving the IA2030 national and sub-national targets [52]. However, further studies, preferably randomized controlled trials, are needed to confirm if strategies aimed at improving MHC utilization actually improve immunization rate. Lastly, our study demonstrates the importance of reporting vaccination coverage at the local/district level to draw attention to regional inequities at that level and identify regions/districts for more targeted interventions.

### Conclusions

The FIC rate in rural communities in Enugu State is below the RED target of 80 % for all antigens by 2020. About one in two children in rural communities in Enugu State is not fully immunized. Determinants of full immunization are single motherhood, maternal healthcare utilization, family income, rural residence, and geographical proximity to health facilities.

**List of abbreviations**

|               |                                  |
|---------------|----------------------------------|
| <b>ANC</b>    | Antenatal care                   |
| <b>BCG</b>    | Bacille Calmette Guerin          |
| <b>DPT</b>    | Diphtheria-Pertussis-Tetanus     |
| <b>EPI</b>    | Expanded program on immunization |
| <b>FIC</b>    | Full immunization coverage       |
| <b>MHC</b>    | Maternal Healthcare              |
| <b>OPV</b>    | Oral polio vaccine               |
| <b>PNC</b>    | Postnatal care                   |
| <b>SBA</b>    | Skilled birth attendant          |
| <b>TT</b>     | Tetanus toxoid                   |
| <b>UNICEF</b> | United Nations Children's Fund   |
| <b>WHO</b>    | World Health Organization        |

## Declarations

### Ethics approval and consent to participate

Ethical approval for the study was obtained from the Ethical Committee of the Enugu State University Teaching Hospital – Reference number: ESUTHP/C-MAC/RA/034/Vol1/264. Permission was also obtained from the State Ministry of Health, Enugu.

Informed verbal consent was obtained from each mother before participating in the study. Verbal consent was deemed appropriate and approved by the ethics committee. Informed verbal consent consisted of a description of the objectives of the study, assurance of confidentiality of personal information, and a specific request for permission to conduct the interview. Consent was obtained in Igbo (the local language) except for a few non-Igbo speaker whose consent was obtained in English. Where the mother was less than 18 years, consent to participate in the study was obtained from the husband (if mother was married) or from the mother's mother/father (if the mother was single).

Children with zero or incomplete immunization were referred to the nearest health center for vaccination. All patient identifiers were removed prior to statistical analysis.

### Consent for publication

Not applicable

### Availability of data and materials

The dataset generated and analyzed in this study is freely available from the corresponding author on reasonable request or directly from the data repository, Zenodo, <http://doi.org/10.5281/zenodo.4294847>

### Competing interests

None declared.

### Funding

This research received no specific grant from any funding agency in the public, commercial or not-for-profit sectors'

### Author contributions

PE and YA conceptualized the study, oversaw its conduct, analyzed the data, interpreted the results, drafted the original article, and reviewed the final draft. UJA, CLA, SAA, and LOL contributed to the collection and analysis of the data, interpretation of the results, and review of the final draft. All authors read and approved the final manuscript.

### Acknowledgements

The authors are immensely grateful to Mrs Priscilla Aniekwe and George Okafor for invaluable assistance with the data collection. We are also indebted to our team of community social workers without whom this study would not have been possible.

### Authors' information (optional)

Not applicable

1  
2  
3  
4  
5  
6  
7  
8  
9  
10  
11  
12  
13  
14  
15  
16  
17  
18  
19  
20  
21  
22  
23  
24  
25  
26  
27  
28  
29  
30  
31  
32  
33  
34  
35  
36  
37  
38  
39  
40  
41  
42  
43  
44  
45  
46  
47  
48  
49  
50  
51  
52  
53  
54  
55  
56  
57  
58  
59  
60

**Caption for Figure 1**

**Figure 1: Map of Nigeria above showing Enugu State and Map of Enugu state showing the study area (four LGAs).**

Adapted from image culled from Ugoyibo OV, Amaechi IF, Obinna AC. Evaluation of Groundwater Pollution Sources in Enugu North LGA of Enugu State , Nigeria. IJSAR J Environ Earth Phys Sci. 2015;2(3):54–69.

For peer review only

## References

1. World Health Organization. Immunization coverage [Internet]. Fact sheets. 2020 [cited 2020 Aug 22]. Available from: <https://www.who.int/news-room/fact-sheets/detail/immunization-coverage>
2. United Nations Children Fund (UNICEF). Immunization [Internet]. UNICEF Data: Monitoring the situation of children and women. 2020 [cited 2020 Aug 2]. Available from: <https://data.unicef.org/topic/child-health/immunization/>
3. Orensteina WA, Ahmed R. Simply put: Vaccination saves lives. *Proc Natl Acad Sci*. 2017;114(16):4031–3.
4. Rémy V, Zöllner Y, Heckmann U. Vaccination: the cornerstone of an efficient healthcare system. *J Mark Access Heal Policy*. 2015;3(1):27041.
5. Zhou F, Shefer A, Wenger J, Messonnier M, Wang LY, Lopez A, et al. Economic evaluation of the routine childhood immunization program in the united states, 2009. *Pediatrics*. 2014;133(4):577–85.
6. Bärnighausen T, Bloom DE, Canning D, Friedman A, Levine OS, O'Brien J, et al. Rethinking the benefits and costs of childhood vaccination: The example of the Haemophilus influenzae type b vaccine. *Vaccine*. 2011;29(13):2371–80.
7. Armstrong EP. Economic benefits and costs associated with target vaccinations. In: *Journal of Managed Care Pharmacy*. 2007. p. 12–5.
8. Zhou F, Santoli J, Messonnier ML, Yusuf HR, Shefer A, Chu SY, et al. Economic evaluation of the 7-vaccine routine childhood immunization schedule in the United States, 2001. *Arch Pediatr Adolesc Med*. 2005;159(12):1136–44.
9. Greenwood B. The contribution of vaccination to global health: Past, present and future. *Philos Trans R Soc B Biol Sci*. 2014;369(1645):1–5.
10. Obanewa OA, Newell ML. The role of place of residency in childhood immunisation coverage in Nigeria: Analysis of data from three DHS rounds 2003–2013. *BMC Public Health*. 2020;20(1):1–13.
11. Masresha BG, Dixon MG, Kriss JL, Katsande R, Shibeshi ME, Luce R, et al. Progress Toward Measles Elimination — African Region , 2013 – 2016. *Morb Mortal Wkly Rep*. 2017;66(17):436–43.
12. Masresha BG, Braka F, Onwu NU, Oteri J, Erbetto T, Oladele S, et al. Progress Towards Measles Elimination in Nigeria: 2012 – 2016. *J Immunol Sci Res [Internet]*. 2018;S(020):135–9. Available from: <http://www.immunologyresearchjournal.com/articles/progress-towards-measles-elimination-in-nigeria-2012--2016.pdf>
13. Adedokun ST, Uthman OA, Adekanmbi VT, Wiysonge CS. Incomplete childhood immunization in Nigeria: A multilevel analysis of individual and contextual factors. *BMC Public Health*. 2017;17(236):1–10.
14. Anyene BC. Routine Immunization in Nigeria: The role of Politics, and Cultural practices. *African J Heal Econ*. 2014;03(1):01–9.
15. Ophori EA, Tula MY, Azih A V, Okojie R, Ikpo EP. Current trends of immunization in Nigeria: Prospect and challenges. *Trop Med Health*. 2014;42(2):67–75.
16. Adeloye D, Jacobs W, Amuta AO, Ogunidipe O, Mosaku O, Gadanya MA, et al. Coverage and determinants of childhood immunization in Nigeria: A systematic review and meta-analysis. *Vaccine [Internet]*. 2017;35(22):2871–81. Available from: <http://dx.doi.org/10.1016/j.vaccine.2017.04.034>
17. World Health Organization, United Nations Children Fund (UNICEF). Nigeria - WHO and UNICEF estimates of immunization coverage, 2019 revision [Internet]. WHO UNICEF Immunization Coverage Estimates. 2020 [cited 2020 Aug 2]. p. 1–33. Available from: [https://www.who.int/immunization/monitoring\\_surveillance/data/nga.pdf](https://www.who.int/immunization/monitoring_surveillance/data/nga.pdf)
18. Mosser JF, Gagne-Maynard W, Rao PC, Osgood-Zimmerman A, Fullman N, Graetz N, et al. Mapping diphtheria-pertussis-tetanus vaccine coverage in Africa, 2000–2016: a spatial and temporal modelling study. *Lancet [Internet]*. 2019;393(10183):1843–55. Available from: [http://dx.doi.org/10.1016/S0140-6736\(19\)30226-0](http://dx.doi.org/10.1016/S0140-6736(19)30226-0)
19. Gunnala R, Ogbuanu IU, Adegoke OJ, Scobie HM, Uba B V, Wannemuehler KA, et al. Routine vaccination coverage in northern nigeria: Results from 40 district-level cluster surveys, 2014–2015. *PLoS One*. 2016;11(12):2014–5.
20. World Health Organization (WHO). Immunization Agenda 2030: A global strategy to leave no one behind [Internet]. 2019. Available from: [https://www.who.int/immunization/ia2030\\_Draft\\_One\\_English.pdf?ua=1](https://www.who.int/immunization/ia2030_Draft_One_English.pdf?ua=1)
21. World Health Organization. The RED strategy [Internet]. Immunization, Vaccines and Biologicals. 2018 [cited 2020 Aug 22]. Available from: [https://www.who.int/immunization/programmes\\_systems/service\\_delivery/red/en/](https://www.who.int/immunization/programmes_systems/service_delivery/red/en/)
22. Corsi DJ, Neuman M, Finlay JE, Subramanian S V. Demographic and health surveys: A profile. *Int J Epidemiol*. 2012;41(6):1602–13.

23. Dunkle SE, Wallace AS, MacNeil A, Mustafa M, Gasasira A, Ali D, et al. Limitations of using administratively reported immunization data for monitoring routine immunization system performance in Nigeria. *J Infect Dis.* 2014;210(Suppl 1):S523–30.
24. World Health Organization. Enugu State inaugurates Task Force on Immunization, to close gaps in immunization coverage [Internet]. WHO Africa / Nigeria. 2020 [cited 2020 Apr 20]. Available from: <https://www.afro.who.int/news/enugu-state-inaugurates-task-force-immunization-close-gaps-immunization-coverage>
25. National Population Commission (NPC) Nigeria, ICF. Nigeria Demographic Health Survey 2018 [Internet]. Abuja, Nigeria and Rockville, Maryland, USA; 2019. Available from: <https://dhsprogram.com/publications/publication-fr359-dhs-final-reports.cfm>
26. World Health Organization. World Health Organization Vaccination Coverage Cluster Surveys: Reference Manual [Internet]. Geneva: World Health Organization; 2018. 234 p. Available from: [https://www.who.int/immunization/documents/who\\_ivb\\_18.09/en/](https://www.who.int/immunization/documents/who_ivb_18.09/en/)
27. Von Elm E, Altman DG, Egger M, Pocock SJ, Gøtzsche PC, Vandenbroucke JP. The Strengthening the Reporting of Observational Studies in Epidemiology (STROBE) statement: Guidelines for reporting observational studies. *Epidemiology.* 2007;18(6):800–4.
28. Ekoh PC, George E, Ejimkaraonye C. Nigeria demographic report: the effect of overpopulation on life expectancy. *African Popul Stud.* 2020;34(1):5106–14.
29. National Population Commission, National Bureau of Statistics. National, State and Local Government Population Forecasts. Abuja, Nigeria: National Population Commission; 2016.
30. Eze P, Agu UJ, Aniebo CL, Agu SA, Lawani LO. Perception and attitudinal factors contributing to periodic deworming of preschool children in an urban slum, Nigeria. *BMC Public Health.* 2020;20(1):1–12.
31. Odusanya OO, Alufohai EF, Meurice FP, Ahonkhai VI. Determinants of vaccination coverage in rural Nigeria. *BMC Public Health.* 2008;8:1–8.
32. Uzochukwu BS, Okeke CC, Enzuladu E, Mbachu C, Okwuosa C, Onwujekwe OE. Inequity in access to childhood immunization in Enugu urban, Southeast Nigeria. *Niger J Clin Pract.* 2017;20(8):971–7.
33. Adedire EB, Ajayi I, Fawole OI, Ajumobi O, Kasasa S, Wasswa P, et al. Immunisation coverage and its determinants among children aged 12-23 months in Atakumosa-west district , Osun State Nigeria : a cross-sectional study. *BMC Public Health [Internet].* 2016;16(905):1–8. Available from: <http://dx.doi.org/10.1186/s12889-016-3531-x>
34. Gidado S, Nguku P, Biya O, Waziri NE, Mohammed A, Nsubuga P. Determinants of routine immunization coverage in Bungudu , Zamfara State , Northern Nigeria , May 2010. *Pan Afr Med J.* 2014;18(Suppl 1):1–5.
35. National Primary Healthcare Development Agency (NPHCDA). National Immunization Schedule in Nigeria [Internet]. Publications. 2018 [cited 2020 Jun 22]. Available from: <https://nphcda.gov.ng/wp-content/uploads/delightful-downloads/2018/01/National-Immunization-Schedule-in-Nigeria.pdf>
36. World Health Organization. Fully Immunized Child Rate [Internet]. The Global Health Observatory. 2020 [cited 2020 Aug 20]. Available from: <https://www.who.int/data/gho/indicator-metadata-registry/imr-details/3376>
37. Russo G, Miglietta A, Pezzotti P, Biguioh RM, Bouting Mayaka G, Sobze MS, et al. Vaccine coverage and determinants of incomplete vaccination in children aged 12-23 months in Dschang, West Region, Cameroon: A cross-sectional survey during a polio outbreak. *BMC Public Health.* 2015;15(1):1–11.
38. Seror V, Cortaredona S, Ly EY, Ndiaye S, Gaye I, Fall M, et al. Vaccination card availability and childhood immunization in Senegal. *BMC Public Health.* 2020;20(1):1–13.
39. Porth JM, Wagner AL, Tefera YA, Boulton ML. Childhood immunization in Ethiopia: Accuracy of maternal recall compared to vaccination cards. *Vaccines.* 2019;7(2):1–12.
40. Binyaruka P, Borghi J. Validity of parental recalls to estimate vaccination coverage: Evidence from Tanzania. *BMC Health Serv Res.* 2018;18(1):1–9.
41. Olugbenga-Bello A, Jimoh A, Oke O, Oladejo R. Maternal characteristics and immunization status of children in north central of Nigeria. *Pan Afr Med J.* 2017;26(159):1–15.
42. Kassahun MB, Biks GA, Teferra AS. Level of immunization coverage and associated factors among children aged 12-23 months in Lay Armachiho District, North Gondar Zone, Northwest Ethiopia: a community based cross sectional study. *BMC Res Notes.* 2015;8(1):1–10.
43. Mohamud AN, Feleke A, Worku W, Kifle M, Sharma HR. Immunization coverage of 12-23 months old children and associated factors in Jigjiga District, Somali National Regional State, Ethiopia. *BMC Public Health.* 2014;14(1):1–9.



- 1 44. Baguune B, Ndago JA, Adokiya MN. Immunization dropout rate and data quality among children 12-23 months of age in Ghana. *Arch Public Heal*. 2017;75(1):1–8.
- 2
- 3
- 4 45. Chukwuemeka EEO, Aduma A, Ezeigwe FO. A Re-Interrogation of Immunization Programme in Enugu State Nigeria : Impediments and Way Forward. *J Public Manag Res*. 2019;5(1):45–61.
- 5
- 6 46. Brown VB, Oluwatosin OA. Socio-demographic factors associated with childhood immunization uptake in Akinyele Local Government Area, Oyo State, Nigeria. *African J Med Med Sci*. 2012;41(2):161–7.
- 7
- 8
- 9 47. Itimi K, Dienye PO, Ordinioha B. Community participation and childhood immunization coverage: A comparative study of rural and urban communities of Bayelsa State, south-south Nigeria. *Niger Med J*. 2012;53(1):21–5.
- 10
- 11 48. Chinawa JM. Immunization dropout rates in Ihe, Awgu Local Government Area, Enugu State, South East Nigeria: A 1 year Review. *Ann Med Heal Sci Res*. 2014;4(4):642–6.
- 12
- 13
- 14 49. World Health Organization / United Nations Children’s Fund. Increasing immunization coverage at the health facility level [Internet]. *Vaccines and Biologicals*. 2002 [cited 2020 Aug 24]. Available from: [https://apps.who.int/iris/bitstream/handle/10665/67791/WHO\\_V&B\\_02.27.pdf?sequence=1](https://apps.who.int/iris/bitstream/handle/10665/67791/WHO_V&B_02.27.pdf?sequence=1)
- 15
- 16
- 17 50. Bangura JB, Xiao S, Qiu D, Ouyang F, Chen L. Barriers to childhood immunization in sub-Saharan Africa: A systematic review. *BMC Public Health*. 2020;20(1).
- 18
- 19
- 20 51. Sibeudu FT, Uzochukwu BS, Onwujekwe OE. Rural–urban comparison of routine immunization utilization and its determinants in communities in Anambra States, Nigeria. *SAGE Open Med*. 2019;7:205031211882389.
- 21
- 22 52. Anichukwu OI, Asamoah BO. The impact of maternal health care utilisation on routine immunisation coverage of children in Nigeria: A cross-sectional study. *BMJ Open*. 2019;9(6):1–11.
- 23
- 24
- 25 53. Huldah Ijeoma N. Use of Telephone Calls in Reduction of Dropout Rate of Routine Immunization in a Tertiary Health Facility in South Eastern Nigeria. *Eur J Prev Med*. 2015;3(3):39.
- 26
- 27 54. Gooding E, Spiliotopoulou E, Yadav P. Impact of vaccine stockouts on immunization coverage in Nigeria. *Vaccine* [Internet]. 2019;37(35):5104–10. Available from: <https://doi.org/10.1016/j.vaccine.2019.06.006>
- 28
- 29
- 30 55. Burnett RJ, Mmoledi G, Ngcobo NJ, Dochez C, Seheri LM, Mphahlele MJ. Impact of vaccine stock-outs on infant vaccination coverage: A hospital-based survey from South Africa. *Int Health*. 2018;10(5):376–81.
- 31
- 32 56. World Health Organization. Nigeria to avert over 160,000 deaths in children yearly, with introduction of rotavirus vaccine into immunization schedule [Internet]. *WHO Africa / Nigeria*. 2018 [cited 2020 Aug 22]. Available from: <https://www.afro.who.int/news/nigeria-avert-over-160000-deaths-children-yearly-introduction-rotavirus-vaccine-immunization>
- 33
- 34
- 35 57. World Health Organization. Nigeria Introduces New Vaccine – PCV 10 [Internet]. *WHO Africa / Nigeria*. 2014 [cited 2020 Aug 22]. Available from: <https://www.afro.who.int/news/nigeria-introduces-new-vaccine-pcv-10#:~:text=On 22nd December 2014 the,caused by the pneumococcal bacteria>.
- 36
- 37
- 38
- 39 58. Okeibunor JC, Onyeneho NG, Nwaorgu OC, I’Aronu N, Okoye I, Iremeka FU, et al. Prospects of using community directed intervention strategy in delivering health services among Fulani Nomads in Enugu State, Nigeria. *Int J Equity Health*. 2013;12(1):1–17.
- 40
- 41
- 42
- 43
- 44
- 45
- 46
- 47
- 48
- 49
- 50
- 51
- 52
- 53
- 54
- 55
- 56
- 57
- 58
- 59
- 60

**Table 1:** Socio-demographic characteristics of mother and children in Enugu State, Nigeria, July 2020

| Socio-demographic characteristics                                       | Frequency<br>(N = 1,254) | Proportion<br>(%) |
|-------------------------------------------------------------------------|--------------------------|-------------------|
| <b>Mothers' age</b>                                                     |                          |                   |
| – < 20 years                                                            | 54                       | 4.3%              |
| – 20 – 29 years                                                         | 602                      | 48.0%             |
| – ≥ 30 years                                                            | 598                      | 47.7%             |
| <b>Marital status</b>                                                   |                          |                   |
| – Single                                                                | 50                       | 4.0%              |
| – Currently Married                                                     | 1127                     | 89.9%             |
| – Divorced/Widowed                                                      | 77                       | 7.1%              |
| <b>Mothers' education</b>                                               |                          |                   |
| – Primary or lower                                                      | 77                       | 6.1%              |
| – Secondary or higher                                                   | 1177                     | 93.9%             |
| <b>Mothers' working status</b>                                          |                          |                   |
| – Stay-at-home/Housewife                                                | 307                      | 24.5%             |
| – Working mom                                                           | 947                      | 75.5%             |
| <b>Religion</b>                                                         |                          |                   |
| – Christian                                                             | 1,214                    | 96.8%             |
| – Islam/Muslim                                                          | 20                       | 1.6%              |
| – African Traditional Religion                                          | 20                       | 1.6%              |
| <b>Family monthly income **</b>                                         |                          |                   |
| – < N40,000 (Approx. US \$100)                                          | 544                      | 43.4%             |
| – N40,000 – N79,999                                                     | 416                      | 33.2%             |
| – N80,000 – N119,999                                                    | 256                      | 20.4%             |
| – ≥ N120,000                                                            | 38                       | 3.0%              |
| <b>Ethnic group</b>                                                     |                          |                   |
| – Igbo                                                                  | 1201                     | 95.8%             |
| – Others                                                                | 53                       | 4.2%              |
| <b>Sex/gender of child</b>                                              |                          |                   |
| – Female                                                                | 640                      | 51.0%             |
| – Male                                                                  | 614                      | 49.0%             |
| <b>Birth order of child</b>                                             |                          |                   |
| – First born                                                            | 347                      | 27.7%             |
| – Second or third                                                       | 625                      | 49.8%             |
| – Others                                                                | 282                      | 22.5%             |
| <b>Residence/Community</b>                                              |                          |                   |
| – Rural                                                                 | 503                      | 40.1%             |
| – Urban                                                                 | 751                      | 59.9%             |
| <b>Walking distance to nearest health facility</b>                      |                          |                   |
| – < 30-minutes' walk                                                    | 546                      | 43.5%             |
| – ≥ 30-minutes' walk                                                    | 708                      | 56.5%             |
| <b>Source of information on Immunization</b> (more than source applies) |                          |                   |
| – Hospital/Health facility                                              | 913                      | 72.8%             |

|   |                               |     |       |
|---|-------------------------------|-----|-------|
| 1 | – Family/friends              | 789 | 62.9% |
| 2 | – Church/Mosque               | 328 | 26.2% |
| 3 | – TV, Radio, and social media | 193 | 15.4% |
| 4 |                               |     |       |

5 \*\* 1 USD = N400.00 on the Currency exchange market in July 2020; [www.oanda.com](http://www.oanda.com)

6  
7  
8  
9  
10  
11  
12  
13  
14  
15  
16  
17  
18  
19  
20  
21  
22  
23  
24  
25  
26  
27  
28  
29  
30  
31  
32  
33  
34  
35  
36  
37  
38  
39  
40  
41  
42  
43  
44  
45  
46  
47  
48  
49  
50  
51  
52  
53  
54  
55  
56  
57  
58  
59  
60

For peer review only

**Table 2:** Immunization coverage for routine immunization (RI) antigens in Enugu State, Nigeria, July 2020

| RI Antigen                               | State-wide Coverage<br>N = 1,254<br>n, (% , [95% CI]) | Coverage in Urban<br>communities<br>N = 751<br>n, (% , [95% CI]) | Coverage in Rural<br>communities<br>N = 503<br>n, (% , [95% CI]) |
|------------------------------------------|-------------------------------------------------------|------------------------------------------------------------------|------------------------------------------------------------------|
| Antigens administered at birth           |                                                       |                                                                  |                                                                  |
| – BCG <sup>##</sup>                      | 1,136 (90.6%, [88.8% – 92.1%])                        | 741 (98.7%, [97.6% – 99.4%])                                     | 395 (78.5%, [74.7% – 82.0%])                                     |
| Antigens administered at 6 weeks         |                                                       |                                                                  |                                                                  |
| – OPV 1                                  | 1,137 (90.7%, [88.9% – 92.2%])                        | 742 (98.8%, [97.7% – 99.5%])                                     | 395 (78.5%, [74.7% – 82.0%])                                     |
| – Penta 1                                | 1,136 (90.6%, [88.8% – 92.1%])                        | 738 (98.3%, [97.1% – 99.1%])                                     | 398 (79.1%, [75.2% – 82.7%])                                     |
| Antigens administered at 10 weeks        |                                                       |                                                                  |                                                                  |
| – OPV 2                                  | 1,083 (86.4%, [84.3% – 88.2%])                        | 741 (98.7%, [97.6% – 99.4%])                                     | 342 (68.0%, [63.7% – 72.1%])                                     |
| – Penta 2                                | 1,090 (86.9%, [84.9% – 88.7%])                        | 736 (98.0%, [96.7% – 98.9%])                                     | 354 (70.4%, [66.2% – 74.3%])                                     |
| Antigens administered at 14 weeks        |                                                       |                                                                  |                                                                  |
| – OPV 3 <sup>##</sup>                    | 1,042 (83.1%, [80.9% – 85.1%])                        | 740 (98.5%, [97.4% – 99.3%])                                     | 302 (60.0%, [55.6% – 64.3%])                                     |
| – Penta 3 <sup>##</sup>                  | 1,052 (83.9%, [81.7% – 85.9%])                        | 735 (97.9%, [96.6% – 98.8%])                                     | 317 (63.0%, [58.6% – 67.3%])                                     |
| Antigens administered at 9 months        |                                                       |                                                                  |                                                                  |
| – Measles <sup>##</sup>                  | 1,101 (87.8%, [85.9% – 89.6%])                        | 716 (95.3%, [93.6% – 96.7%])                                     | 385 (76.5%, [72.6% – 80.2%])                                     |
| – Yellow fever                           | 1,081 (86.2%, [84.2% – 88.1%])                        | 720 (95.9%, [94.2% – 97.2%])                                     | 361 (71.8%, [67.6% – 75.7%])                                     |
| Supplements                              |                                                       |                                                                  |                                                                  |
| – Vitamin A                              | 1,059 (84.4%, [82.3% – 86.4%])                        | 721 (96.0%, [94.3% – 97.3%])                                     | 338 (67.2%, [62.9% – 71.3%])                                     |
| <b>Immunization status <sup>##</sup></b> |                                                       |                                                                  |                                                                  |
| – Fully immunized                        | 989 (78.9%, [76.5% – 81.1%])                          | 710 (94.5%, [92.7% – 96.1%])                                     | 279 (55.5%, [51.0% – 59.9%])                                     |
| – Partially immunized                    | 197 (15.7%, [13.7% – 17.8%])                          | 34 (4.5%, [3.2% – 6.3%])                                         | 163 (32.4%, [28.3% – 36.7%])                                     |
| – Unimmunized (Zero-dose)                | 68 (5.4%, [4.2% – 6.8%])                              | 7 (0.9%, [0.4% – 1.9%])                                          | 61 (12.1%, [9.4% – 15.3%])                                       |

<sup>##</sup> Vaccines included in the definition of immunization status (Fully immunized child vs Partially immunized vs Unimmunized)

**Table 3:** Maternal health care utilization history and knowledge of routine immunization in Enugu State, Nigeria 2020

| Characteristics                                               | Fully immunized (n = 989) | Not fully immunized (n = 265) | Crude Odds ratio (95% CI) | p-value |
|---------------------------------------------------------------|---------------------------|-------------------------------|---------------------------|---------|
| <b>MOTHERS' HEALTH CARE UTILIZATION HISTORY</b>               |                           |                               |                           |         |
| <b>Use of Skilled birth attendants (SBA)</b>                  |                           |                               |                           |         |
| – Yes (Hospital)                                              | 309 (84.7%)               | 56 (15.3%)                    | 1.70 (1.23 – 2.35)        | 0.001   |
| – No (TBA, Home delivery)                                     | 680 (76.5%)               | 209 (23.5%)                   |                           |         |
| <b>Attended ante-natal care (ANC)</b>                         |                           |                               |                           |         |
| – ≥ Four ante-natal visits                                    | 762 (77.8%)               | 217 (22.2%)                   | 0.74 (0.53 – 1.05)        | 0.091   |
| – < Four ante-natal visits                                    | 227 (82.5%)               | 48 (17.5%)                    |                           |         |
| <b>Tetanus toxoid (TT) injection during pregnancy</b>         |                           |                               |                           |         |
| – ≥ 2 TT injections                                           | 784 (79.0%)               | 209 (21.0%)                   | 1.03 (0.74 – 1.43)        | 0.888   |
| – < 2 TT injection                                            | 205 (78.5%)               | 56 (21.5%)                    |                           |         |
| <b>Attended post-natal care (PNC)</b>                         |                           |                               |                           |         |
| – Yes                                                         | 866 (89.2%)               | 105 (10.8%)                   | 10.73 (7.87 – 14.63)      | < 0.001 |
| – No                                                          | 123 (43.5%)               | 160 (56.5%)                   |                           |         |
| <b>MOTHERS' AWARENESS OF ROUTINE IMMUNIZATION</b>             |                           |                               |                           |         |
| <b>What do vaccines do to your child's body?</b>              |                           |                               |                           |         |
| – Vaccines help prevent illness                               | 937 (78.5%)               | 256 (21.5%)                   | 0.63 (0.31 – 1.30)        | 0.210   |
| – Other responses **                                          | 44 (88.0%)                | 6 (12.0%)                     |                           |         |
| – I do not know **                                            | 8 (72.7%)                 | 3 (27.3%)                     |                           |         |
| <b>Mention any disease(s) children's vaccines can prevent</b> |                           |                               |                           |         |
| – Mentioned Four (4) or more diseases                         | 481 (90.6%)               | 50 (9.4%)                     | 4.07 (2.92 – 5.68)        | < 0.001 |
| – Less than four (4) diseases **                              | 502 (70.1%)               | 214 (29.9%)                   |                           |         |
| – I do not know **                                            | 6 (85.7%)                 | 1 (14.3%)                     |                           |         |
| <b>At what age does child immunization start?</b>             |                           |                               |                           |         |
| – Just after birth                                            | 858 (84.6%)               | 156 (15.4%)                   | 4.58 (3.37 – 6.22)        | < 0.001 |
| – Stated other dates (1 week, 1 month, etc.) **               | 95 (50.3%)                | 94 (49.7%)                    |                           |         |
| – I do not know **                                            | 36 (70.6%)                | 15 (29.4%)                    |                           |         |
| <b>When does a child complete his/her immunization?</b>       |                           |                               |                           |         |
| – 9 to 15 months                                              | 930 (79.6%)               | 238 (20.4%)                   | 1.79 (1.11 – 2.88)        | 0.016   |
| – < 6 months OR > 15 months **                                | 51 (67.1%)                | 25 (32.9%)                    |                           |         |
| – I do not know **                                            | 8 (80.0%)                 | 2 (20.0%)                     |                           |         |
| <b>What is the age/schedule for each vaccine?</b>             |                           |                               |                           |         |
| – Correct schedule for three or more vaccines                 | 952 (83.3%)               | 191 (16.7%)                   | 9.97 (6.52 – 15.24)       | < 0.001 |
| – Other responses **                                          | 26 (26.3%)                | 73 (73.7%)                    |                           |         |
| – I do not know **                                            | 11 (91.7%)                | 1 (8.3%)                      |                           |         |
| <b>How many HF visits are required for full immunization?</b> |                           |                               |                           |         |
| – At least 5 or 6 visits                                      | 686 (80.4%)               | 167 (19.6%)                   | 1.33 (1.00 – 1.76)        | 0.049   |
| – < 5 visits **                                               | 183 (88.0%)               | 25 (12.0%)                    |                           |         |
| – I do not know **                                            | 120 (62.2%)               | 73 (37.8%)                    |                           |         |
| <b>Scores for Knowledge of routine immunization</b>           |                           |                               |                           |         |
| – Mean Score (± Std Dev)                                      | 10.71 (1.61)              | 9.63 (1.82)                   | 1.07 (0.83 – 1.32) ##     | < 0.001 |

\*\* These responses were combined for estimation of Crude OR. | ## Mean difference (95% CI) | Abbreviations: HF, Health Facility

**Table 4:** Determinants of immunization status of children aged 12-23 months in Enugu State, Nigeria, July 2020

| Socio-demographic Characteristics            | Reference                     | Adjusted OR | 95% CI       | p-value           |
|----------------------------------------------|-------------------------------|-------------|--------------|-------------------|
| <b>INDIVIDUAL LEVEL FACTORS</b>              |                               |             |              |                   |
| <b>Mothers' age</b>                          |                               |             |              |                   |
| – < 20 years                                 | 20 – 29 years                 | 0.17        | 0.03 – 1.06  | 0.058             |
| – ≥ 30 years                                 | 20 – 29 years                 | 0.87        | 0.57 – 1.34  | 0.534             |
| <b>Marital status</b>                        |                               |             |              |                   |
| – Single                                     | Married                       | 5.74        | 1.45 – 22.76 | <b>0.013</b>      |
| – Divorced/Widowed                           | Married                       | 1.35        | 0.60 – 3.07  | 0.468             |
| <b>Mothers' educational status</b>           |                               |             |              |                   |
| – Primary education or lower                 | Secondary education or higher | 0.64        | 0.26 – 1.56  | 0.383             |
| <b>Mother's working status</b>               |                               |             |              |                   |
| – Working mom                                | Stay-at-home/Housewife        | 1.08        | 0.63 – 1.85  | 0.327             |
| <b>Religion of family</b>                    |                               |             |              |                   |
| – Islam/Muslim                               | Christian                     | 1.53        | 0.27 – 8.62  | 0.627             |
| – African traditional                        | Christian                     | 2.21        | 0.44 – 11.13 | 0.335             |
| <b>Sex of the child</b>                      |                               |             |              |                   |
| – Male                                       | Female                        | 0.98        | 0.66 – 1.45  | 0.914             |
| <b>Child's birth order</b>                   |                               |             |              |                   |
| – Second/third child                         | First child                   | 1.52        | 0.78 – 2.98  | 0.220             |
| – Fourth and later children                  | First child                   | 1.34        | 0.48 – 3.74  | 0.577             |
| <b>MHC UTILIZATION &amp; KNOWLEDGE OF RI</b> |                               |             |              |                   |
| <b>Antenatal care (ANC)</b>                  |                               |             |              |                   |
| – < 4 ANC visits                             | ≥ 4 ANC visits                | 1.52        | 0.71 – 3.22  | 0.472             |
| <b>Maternal tetanus toxoid (TT)</b>          |                               |             |              |                   |
| – < 2 doses                                  | ≥ 2 doses                     | 0.93        | 0.41 – 2.10  | 0.864             |
| <b>Use of Skilled birth attendants (SBA)</b> |                               |             |              |                   |
| – No                                         | Yes                           | 1.93        | 1.24 – 2.99  | <b>0.003</b>      |
| <b>Postnatal care (PNC)</b>                  |                               |             |              |                   |
| – No                                         | Yes                           | 6.53        | 4.17 – 10.22 | <b>&lt; 0.001</b> |
| <b>Mothers' knowledge of RI</b>              |                               |             |              |                   |
| – Poor                                       | Satisfactory                  | 1.76        | 1.09 – 2.87  | <b>0.022</b>      |
| <b>COMMUNITY LEVEL FACTORS</b>               |                               |             |              |                   |
| <b>Area of residence</b>                     |                               |             |              |                   |
| – Rural                                      | Urban                         | 7.49        | 4.84 – 11.59 | <b>&lt; 0.001</b> |
| <b>Household monthly income</b>              |                               |             |              |                   |
| – < N80,000 (Approx. USD 200)                | ≥ N80,000 (Approx. USD 200)   | 1.56        | 1.17 – 2.81  | <b>&lt; 0.001</b> |
| <b>Distance to nearest vaccination point</b> |                               |             |              |                   |
| – ≥ 30 minutes' walk                         | < 30 minutes' walk            | 2.15        | 1.31 – 3.52  | <b>0.003</b>      |

1  
2  
3  
4  
5  
6  
7  
8  
9  
10  
11  
12  
13  
14  
15  
16  
17  
18  
19  
20  
21  
22  
23  
24  
25  
26  
27  
28  
29  
30  
31  
32  
33  
34  
35  
36  
37  
38  
39  
40  
41  
42  
43  
44  
45  
46  
47  
48  
49  
50  
51  
52  
53  
54  
55  
56  
57  
58  
59  
60

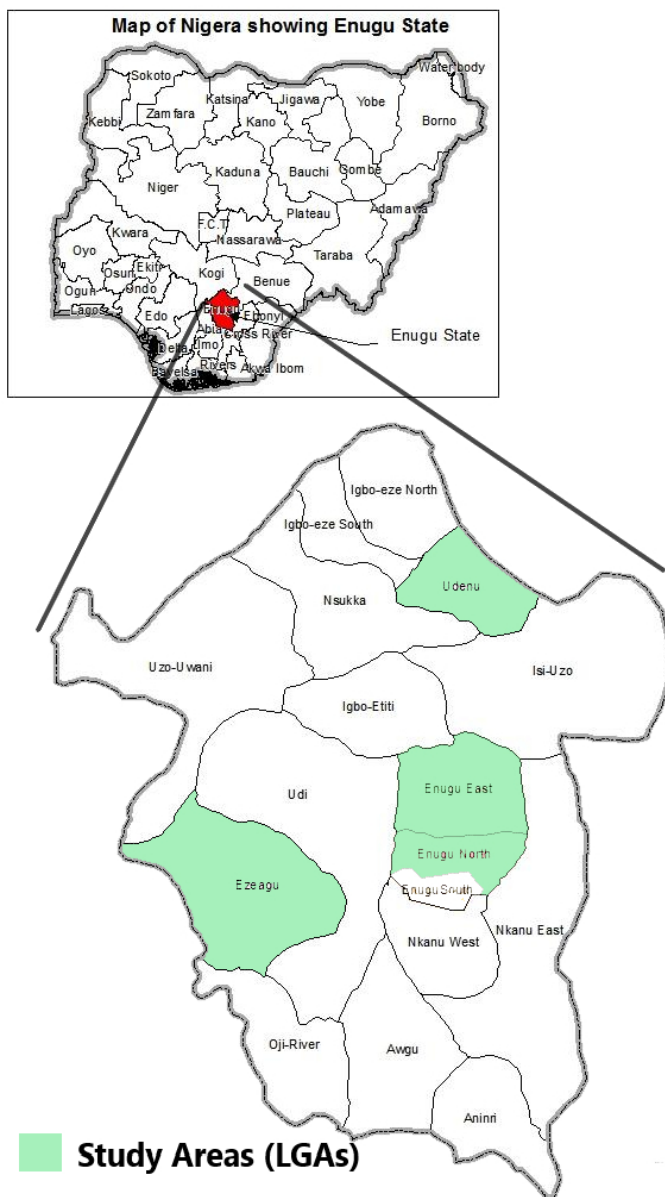

Map of Nigeria above showing Enugu State and Map of Enugu state showing the study area (four LGAs). Adapted from image culled from Ugoyibo OV, Amaechi IF, Obinna AC. Evaluation of Groundwater Pollution Sources in Enugu North LGA of Enugu State , Nigeria. IJSAR J Environ Earth Phys Sci. 2015;2(3):54–69.

56x85mm (300 x 300 DPI)



**Supplement 1:** Reasons mothers of zero-dose (unvaccinated) children gave for not vaccinating their children

| Reasons                                         | Frequency<br>N = 68 | Proportion (%) |
|-------------------------------------------------|---------------------|----------------|
| ◦ I was busy with other things                  | 1                   | 1.5%           |
| ◦ Child was too sick to receive vaccines        | 3                   | 4.4%           |
| ◦ I did not know the schedule for vaccination   | 8                   | 11.8%          |
| ◦ There were no vaccines in our health facility | 26                  | 38.2%          |
| ◦ My religion forbids vaccination               | 1                   | 1.5%           |
| ◦ Vaccination site is too far                   | 29                  | 42.6%          |

For peer review only

## Study Interview guide

### Determinants of incomplete immunization in children aged 12 to 23 months in Enugu, Nigeria – a cross-sectional study

#### **\*\*INSTRUCTIONS\*\***

1. Seek permission from the mother to participate before you commence. If mother is < 18 years old, seek permission of the husband (if mother is < 18 years old and married) or mother's mother/father (if mother is < 18 years old and single)
2. If more than two children in the age bracket, only interview for the youngest child more than 12 months of age
3. Always be polite and courteous throughout the interview. NEVER Shout. NEVER Criticize.
4. Please complete ONE questionnaire for one/each child

#### **Section A: Sociodemographic Data**

1. Local Government Area: \_\_\_\_\_

2. Cluster or Ward: \_\_\_\_\_

3. Mother's age

- a. < 20 yrs
- b. 20 – 24 yrs
- c. 25 – 29 yrs
- d. 30 – 34 yrs
- e. ≥ 35 yrs

4. Marital status

- a. Single
- b. Married
- c. Divorced
- d. Widow

5. Mother's education

- a. None
- b. Primary
- c. Secondary
- d. Tertiary

6. Mother's Occupation

- a. Stay-at-home/Housewife
- b. Farmer
- c. Civil Servant
- d. Trader
- e. Artisan

7. Tribe/Ethnicity

- a. Igbo
- b. Hausa/Fulani
- c. Yoruba

- d. Igala
- e. Others

**8. Family religion**

- a. Christian
- b. Islam/Muslim
- c. African Traditional Religion

**9. Family monthly income**

- a. < N 40,000
- b. N40,000 to N79,999
- c. N80,000 to N119,999
- d. ≥ N120,000

**10. Sex of child**

- a. Female/Girl
- b. Male/Boy

**11. Birth order in the family**

- a. First born
- b. Second or third born
- c. Others

**Section B: Prevalence & Determinants**

**1. Has your child been vaccinated?**

- A. YES
- B. NO

**>> If YES to Q1 above, when was your child vaccinated?**

- A. At the appropriate age
- B. Later than appropriate date

**2. Please where is the Immunization card? Is the mother able to provide the card?**

- A. YES
- B. NO

**>> If mother is NOT able to provide the card, Why?**

- A. Mother cannot find it during interview
- B. Mother lost card before interview, i.e. could not find the card before the day of interview
- C. Mother was not given any immunization card at health centre

**3. How many antenatal care visits did you attend while pregnant for this child?**

- A. None, I did not attend any antenatal clinic
- B. Only one visit
- C. Two visits
- D. Three visits
- E. Four visits or more

**4. How many TT injections did you receive during pregnancy?**

- A. None, I did not receive any TT injection

- 1 B. One injection  
2 C. Two or more injections  
3  
4 **12. Where did you deliver this child?**  
5 A. In a hospital  
6 B. With Traditional birth attendants (TBA)  
7 C. At home  
8  
9  
10 **5. Did you attend any post-natal care consultation after delivering this child?**  
11 A. YES  
12 B. NO  
13  
14 **6. Where did you hear of vaccination? (Please tick all that apply)**  
15 A. Hospital/Health facility  
16 B. Family/friends  
17 C. Church/Mosque  
18 D. TV  
19 E. Radio  
20 F. Social media (Facebook, Twitter, WhatsApp, Instagram)  
21  
22  
23  
24 **7. What does vaccination do to your child's body?**  
25 A. Vaccination prevent illnesses in children  
26 B. Vaccines treat illnesses in children like drugs  
27 C. Vaccines provide nutrients to children like food  
28 D. I do not know  
29  
30  
31 **8. Please mention any disease vaccination can prevent:**  
32 *(Use this list to assess mothers' response: Tuberculosis, Diphtheria, Whooping cough, Tetanus, Poliomyelitis, Hepatitis B*  
33 *virus infection, Measles, Pneumococcal pneumonia)*  
34 A. Mother mentions four (4) or more diseases  
35 B. Mother mentions three (3) or fewer diseases  
36 C. I do not know any diseases vaccination can prevent  
37  
38  
39 **9. When do you start to vaccinate a child?**  
40 A. Just after birth  
41 B. 1 week after birth  
42 C. 2 weeks after birth  
43 D. 1 month after birth  
44 E. Anytime  
45 F. I do not know  
46  
47  
48  
49 **10. When does a child complete his routine vaccination?**  
50 A. 6 months  
51 B. 9 months  
52 C. 12 months (1 year)  
53 D. 15 months  
54 E. 2 years  
55 F. 5 years  
56 G. I do not know  
57  
58  
59  
60

1  
2  
3  
4 **11. Do you know the right age or schedule for routine vaccination of infants?**

5 *(Use vaccination schedule on the paper titled, 'NPHCDA routine immunization schedule' to assess mothers' response)*

- 6 A. Mother mentions correct schedule for three (3) or more vaccines  
7 B. Mother mentions correct schedule for one or two vaccines  
8 C. I do not know  
9

10  
11 **12. How many visits are needed to complete the immunization for a child**

- 12 A. One (1) visit  
13 B. 2 or 3 visits  
14 C. 5 or 6 visits  
15 D. I do not know  
16

17  
18 **13. Using the Google Map app on your phone, how far is the nearest vaccination centre to this house?**

- 19 A. Less than 30 mins walk  
20 B. About or more 30 mins' walk  
21  
22  
23  
24

25 **Section C: Immunization status**

26  
27 If you answered YES to Question 1 above, which of these vaccines has he/she received?

28  
29 **Step 1:** FIRST, ask the mothers to know how many vaccinations she can recall, and tick accordingly

30  
31 **Step 2:** Then, cross check with the Vaccination/Immunization Card, and tick accordingly

32  
33

| S/n | Vaccine         | Age      | 1). Mothers recall |    | 2). Immunization Card |    |
|-----|-----------------|----------|--------------------|----|-----------------------|----|
|     |                 |          | YES                | NO | YES                   | NO |
| 1   | BCG             | At birth |                    |    |                       |    |
| 2   | OPV-1           | 6 weeks  |                    |    |                       |    |
| 3   | OPV-2           | 10 weeks |                    |    |                       |    |
| 4   | OPV-3           | 14 weeks |                    |    |                       |    |
| 5   | Pentavalent – 1 | 6 weeks  |                    |    |                       |    |
| 6   | Pentavalent – 2 | 10 weeks |                    |    |                       |    |
| 7   | Pentavalent – 3 | 14 weeks |                    |    |                       |    |
| 8   | Vitamin A       | 6 months |                    |    |                       |    |
| 9   | Measles vaccine | 9 months |                    |    |                       |    |
| 10  | Yellow fever    | 9 months |                    |    |                       |    |

34  
35  
36  
37  
38  
39  
40  
41  
42  
43  
44  
45  
46  
47  
48  
49  
50  
51 **\*\* The END \*\***

52  
53  
54  
55 **Thank the mother profusely .... Daalu nnukwu / Thank you very much!!**  
56  
57  
58  
59

**STROBE 2007 (v4) Statement—Checklist of items that should be included in reports of *cross-sectional studies***

| Section/Topic                | Item # | Recommendation                                                                                                                                                                       | Reported on page # |
|------------------------------|--------|--------------------------------------------------------------------------------------------------------------------------------------------------------------------------------------|--------------------|
| <b>Title and abstract</b>    | 1      | (a) Indicate the study's design with a commonly used term in the title or the abstract                                                                                               | 1                  |
|                              |        | (b) Provide in the abstract an informative and balanced summary of what was done and what was found                                                                                  | 1                  |
| <b>Introduction</b>          |        |                                                                                                                                                                                      |                    |
| Background/rationale         | 2      | Explain the scientific background and rationale for the investigation being reported                                                                                                 | 2,3                |
| Objectives                   | 3      | State specific objectives, including any prespecified hypotheses                                                                                                                     | 3                  |
| <b>Methods</b>               |        |                                                                                                                                                                                      |                    |
| Study design                 | 4      | Present key elements of study design early in the paper                                                                                                                              | 3                  |
| Setting                      | 5      | Describe the setting, locations, and relevant dates, including periods of recruitment, exposure, follow-up, and data collection                                                      | 3                  |
| Participants                 | 6      | (a) Give the eligibility criteria, and the sources and methods of selection of participants                                                                                          | 4                  |
| Variables                    | 7      | Clearly define all outcomes, exposures, predictors, potential confounders, and effect modifiers. Give diagnostic criteria, if applicable                                             | 4                  |
| Data sources/<br>measurement | 8*     | For each variable of interest, give sources of data and details of methods of assessment (measurement). Describe comparability of assessment methods if there is more than one group | 4                  |
| Bias                         | 9      | Describe any efforts to address potential sources of bias                                                                                                                            | 4                  |
| Study size                   | 10     | Explain how the study size was arrived at                                                                                                                                            | 3,4                |
| Quantitative variables       | 11     | Explain how quantitative variables were handled in the analyses. If applicable, describe which groupings were chosen and why                                                         | 4                  |
| Statistical methods          | 12     | (a) Describe all statistical methods, including those used to control for confounding                                                                                                | 5                  |
|                              |        | (b) Describe any methods used to examine subgroups and interactions                                                                                                                  | 5                  |
|                              |        | (c) Explain how missing data were addressed                                                                                                                                          | 5                  |
|                              |        | (d) If applicable, describe analytical methods taking account of sampling strategy                                                                                                   | 5                  |
|                              |        | (e) Describe any sensitivity analyses                                                                                                                                                | 5                  |
| <b>Results</b>               |        |                                                                                                                                                                                      |                    |

|                          |     |                                                                                                                                                                                                              |                |
|--------------------------|-----|--------------------------------------------------------------------------------------------------------------------------------------------------------------------------------------------------------------|----------------|
| Participants             | 13* | (a) Report numbers of individuals at each stage of study—eg numbers potentially eligible, examined for eligibility, confirmed eligible, included in the study, completing follow-up, and analysed            | 5              |
|                          |     | (b) Give reasons for non-participation at each stage                                                                                                                                                         | Not applicable |
|                          |     | (c) Consider use of a flow diagram                                                                                                                                                                           | Not applicable |
| Descriptive data         | 14* | (a) Give characteristics of study participants (eg demographic, clinical, social) and information on exposures and potential confounders                                                                     | 5              |
|                          |     | (b) Indicate number of participants with missing data for each variable of interest                                                                                                                          | Not applicable |
| Outcome data             | 15* | Report numbers of outcome events or summary measures                                                                                                                                                         | 5              |
| Main results             | 16  | (a) Give unadjusted estimates and, if applicable, confounder-adjusted estimates and their precision (eg, 95% confidence interval). Make clear which confounders were adjusted for and why they were included | 5              |
|                          |     | (b) Report category boundaries when continuous variables were categorized                                                                                                                                    | 5              |
|                          |     | (c) If relevant, consider translating estimates of relative risk into absolute risk for a meaningful time period                                                                                             |                |
| Other analyses           | 17  | Report other analyses done—eg analyses of subgroups and interactions, and sensitivity analyses                                                                                                               | 5              |
| <b>Discussion</b>        |     |                                                                                                                                                                                                              |                |
| Key results              | 18  | Summarise key results with reference to study objectives                                                                                                                                                     | 6              |
| Limitations              | 19  | Discuss limitations of the study, taking into account sources of potential bias or imprecision. Discuss both direction and magnitude of any potential bias                                                   | 6,7            |
| Interpretation           | 20  | Give a cautious overall interpretation of results considering objectives, limitations, multiplicity of analyses, results from similar studies, and other relevant evidence                                   | 6              |
| Generalisability         | 21  | Discuss the generalisability (external validity) of the study results                                                                                                                                        | 7              |
| <b>Other information</b> |     |                                                                                                                                                                                                              |                |
| Funding                  | 22  | Give the source of funding and the role of the funders for the present study and, if applicable, for the original study on which the present article is based                                                | 9              |

\*Give information separately for cases and controls in case-control studies and, if applicable, for exposed and unexposed groups in cohort and cross-sectional studies.

**Note:** An Explanation and Elaboration article discusses each checklist item and gives methodological background and published examples of transparent reporting. The STROBE checklist is best used in conjunction with this article (freely available on the Web sites of PLoS Medicine at <http://www.plosmedicine.org/>, Annals of Internal Medicine at <http://www.annals.org/>, and Epidemiology at <http://www.epidem.com/>). Information on the STROBE Initiative is available at [www.strobe-statement.org](http://www.strobe-statement.org).



# BMJ Open

## Factors associated with incomplete immunization in children aged 12 to 23 months at sub-national level, Nigeria – a cross-sectional study

|                                 |                                                                                                                                                                                                                                                                                                                                                                                                                                                                                                                                                                  |
|---------------------------------|------------------------------------------------------------------------------------------------------------------------------------------------------------------------------------------------------------------------------------------------------------------------------------------------------------------------------------------------------------------------------------------------------------------------------------------------------------------------------------------------------------------------------------------------------------------|
| Journal:                        | <i>BMJ Open</i>                                                                                                                                                                                                                                                                                                                                                                                                                                                                                                                                                  |
| Manuscript ID                   | bmjopen-2020-047445.R2                                                                                                                                                                                                                                                                                                                                                                                                                                                                                                                                           |
| Article Type:                   | Original research                                                                                                                                                                                                                                                                                                                                                                                                                                                                                                                                                |
| Date Submitted by the Author:   | 14-May-2021                                                                                                                                                                                                                                                                                                                                                                                                                                                                                                                                                      |
| Complete List of Authors:       | Eze, Paul; Penn State - Main Campus, Health Policy and Administration<br>Agu, Ujunwa; Enugu State University Teaching Hospital, Parklane, Enugu, Department of Paediatrics<br>Aniebo, Chioma; Enugu State University Teaching Hospital, Parklane, Enugu, Department of Paediatrics<br>Agu, Sergius; University of Nigeria Teaching Hospital, Department of Paediatrics<br>Lawani, Lucky; University of Toronto, Institute of Health Policy, Management & Evaluation<br>Acharya, Yubraj; Penn State - Main Campus, Department of Health Policy and Administration |
| <b>Primary Subject Heading</b>: | Public health                                                                                                                                                                                                                                                                                                                                                                                                                                                                                                                                                    |
| Secondary Subject Heading:      | Global health, Paediatrics                                                                                                                                                                                                                                                                                                                                                                                                                                                                                                                                       |
| Keywords:                       | Community child health < PAEDIATRICS, International health services < HEALTH SERVICES ADMINISTRATION & MANAGEMENT, Public health < INFECTIOUS DISEASES                                                                                                                                                                                                                                                                                                                                                                                                           |
|                                 |                                                                                                                                                                                                                                                                                                                                                                                                                                                                                                                                                                  |

SCHOLARONE™  
Manuscripts



I, the Submitting Author has the right to grant and does grant on behalf of all authors of the Work (as defined in the below author licence), an exclusive licence and/or a non-exclusive licence for contributions from authors who are: i) UK Crown employees; ii) where BMJ has agreed a CC-BY licence shall apply, and/or iii) in accordance with the terms applicable for US Federal Government officers or employees acting as part of their official duties; on a worldwide, perpetual, irrevocable, royalty-free basis to BMJ Publishing Group Ltd ("BMJ") its licensees and where the relevant Journal is co-owned by BMJ to the co-owners of the Journal, to publish the Work in this journal and any other BMJ products and to exploit all rights, as set out in our [licence](#).

The Submitting Author accepts and understands that any supply made under these terms is made by BMJ to the Submitting Author unless you are acting as an employee on behalf of your employer or a postgraduate student of an affiliated institution which is paying any applicable article publishing charge ("APC") for Open Access articles. Where the Submitting Author wishes to make the Work available on an Open Access basis (and intends to pay the relevant APC), the terms of reuse of such Open Access shall be governed by a Creative Commons licence – details of these licences and which [Creative Commons](#) licence will apply to this Work are set out in our licence referred to above.

Other than as permitted in any relevant BMJ Author's Self Archiving Policies, I confirm this Work has not been accepted for publication elsewhere, is not being considered for publication elsewhere and does not duplicate material already published. I confirm all authors consent to publication of this Work and authorise the granting of this licence.

1  
2  
3  
4  
5  
6  
7  
8  
9  
10  
11  
12  
13  
14  
15  
16  
17  
18  
19  
20  
21  
22  
23  
24  
25  
26  
27  
28  
29  
30  
31  
32  
33  
34  
35  
36  
37  
38  
39  
40  
41  
42  
43  
44  
45  
46  
47  
48  
49  
50  
51  
52  
53  
54  
55  
56  
57  
58  
59  
60

Research Article

## Factors associated with incomplete immunization in children aged 12-23 months at sub-national level, Nigeria – a cross-sectional study

Paul Eze<sup>1\*</sup>, Ujunwa Justina Agu<sup>2</sup>, Chioma Lynda Aniebo<sup>2</sup>, Sergius Alex Agu<sup>3</sup>, Lucky Osaheni Lawani<sup>4</sup>, and Yubraj Acharya<sup>1</sup>

1. Department of Health Policy & Administration, Penn State University, University Park, PA 16802, USA
2. Department of Paediatrics, Enugu State University Teaching Hospital, Parklane, Enugu, Nigeria
3. Department of Paediatrics, University of Nigeria Teaching Hospital, Ituku-Ozalla, Enugu, Nigeria
4. Institute of Health Policy, Management & Evaluation, University of Toronto, Toronto, ON M5T 3M6, Canada

\*Corresponding Author

Email: [peze@psu.edu](mailto:peze@psu.edu)

Tel. +1 223 216 1640

Email address & ORCID number of co-authors:

1. Dr. Paul Eze: [peze@psu.edu](mailto:peze@psu.edu) | 0000-0001-7202-8676
2. Dr. Ujunwa Justina Agu: [uagu247@gmail.com](mailto:uagu247@gmail.com)
3. Dr. Chioma Lynda Aniebo: [drkaniebo@gmail.com](mailto:drkaniebo@gmail.com)
4. Dr. Sergius Alex Agu: [agusergiusalex@gmail.com](mailto:agusergiusalex@gmail.com) | 0000-0002-0566-2068
5. Dr. Lucky Osaheni Lawani: [osaheni.lawani@mail.utoronto.ca](mailto:osaheni.lawani@mail.utoronto.ca) | 0000-0002-5350-7441
6. Professor Yubraj Acharya: [yua36@psu.edu](mailto:yua36@psu.edu) | 0000-0002-9003-636X

### Word Count

**Abstract:** 297 words (Max, 300) | **Text:** 3,861 words (Max, 4,000) | **Table/figures:** 4 + 1 (Max, 5) | **References:** 60 (Max, NA)

### Abstract

**Objectives:** National immunization coverage rate masks sub-national immunization coverage gaps at the state and local district levels. The objective of the current study was to determine the socio-demographic factors associated with incomplete immunization in children at a sub-national level.

**Design:** Cross-sectional study using the World Health Organization sampling method (2018 Reference Manual).

**Setting:** Fifty randomly selected clusters (wards) in four districts (two urban and two rural) in Enugu State, Nigeria.

**Participants:** 1,254 mothers of children aged 12-23 months in July 2020.

**Primary and secondary outcome measures:** Fully immunized children and not fully immunized children.

**Results:** Full immunization coverage (FIC) rate in Enugu State was 78.9% (95% CI = 76.5% – 81.1%). However, stark difference exists in FIC rate in urban versus rural districts. Only 55.5% of children in rural communities are fully immunized compared to 94.5% in urban communities. Significant factors associated with incomplete immunization are: children of single mothers (aOR = 5.74, 95% CI = 1.45 – 22.76), children delivered without skilled birth attendant present (aOR = 1.93, 95% CI = 1.24 – 2.99), children of mothers who did not receive postnatal care (aOR = 6.53, 95% CI = 4.17 – 10.22), children of mothers with poor knowledge of routine immunization (aOR = 1.76, 95% CI = 1.09 – 2.87), dwelling in rural district (aOR = 7.49, 95% CI = 4.84 – 11.59), low-income families (aOR = 1.56, 95% CI = 1.17 – 2.81), and living further than 30 minutes from the nearest vaccination facility (aOR = 2.15, 95% CI = 1.31 – 3.52).

1 **Conclusions:** Although the proportion of fully-immunized children in Enugu State is low, it is significantly lower in rural  
2 districts. Study findings suggest the need for innovative solutions to improve geographical accessibility and reinforce the  
3 importance of reporting vaccination coverage at local district level to identify districts for more targeted interventions.  
4  
5  
6  
7

### 8 **Strengths and limitations of this study**

9

- 10 ◦ The estimates presented in the study for the sub-national level are potentially more accurate than previous  
11 estimates.
- 12
- 13 ◦ We adhered to the guidelines in WHO Vaccination Coverage Cluster Surveys Reference Manual 2019, thus enabling  
14 greater comparability with future studies using the same method.
- 15
- 16
- 17 ◦ Due to the observational cross-sectional design, we cannot establish a causal relationship between these factors and  
18 vaccination.
- 19
- 20 ◦ This study considerably relied on maternal recall which can lead to overestimation or underestimation of  
21 immunization coverage estimates.
- 22
- 23
- 24 ◦ We were unable to access pockets of historically healthcare-marginalized population in one of the settlements due  
25 to security concerns.
- 26
- 27
- 28

29 **Keywords:** Routine immunization, Vaccination coverage, Children, Nigeria  
30  
31  
32  
33

### 34 **Introduction**

35  
36 Immunization, defined as the process that makes a person immune or resistant to an infectious disease, typically by the  
37 administration of a vaccine, is one of the most effective interventions in contemporary public health practice [1,2]. Several  
38 cost-benefits analyses have consistently placed immunization as one of the most cost-effective health interventions with  
39 huge direct and societal benefits [3–8]. Immunization saves about 2-3 million lives every year [1,2], and has successfully led  
40 to the elimination of a number of vaccine-preventable diseases in some high-income countries, including polio, diphtheria,  
41 and pertussis [3,9]. Indeed, childhood immunization has had a remarkable impact on child morbidity and mortality  
42 worldwide with immense positive multiplier effects on the larger communities [3,5,9].  
43

44  
45 Nigeria is one of the 10 countries (Angola, Brazil, the Democratic Republic of the Congo, Ethiopia, India, Indonesia, Mexico,  
46 Nigeria, Pakistan, and the Philippines) that account for over 60% of the children who did not get DTP3 in 2019 [1]. DTP3  
47 coverage is an indicator of how well countries are providing routine immunization services [2]. In 2017, about 20% of the  
48 world's infants with incomplete DPT immunization lived in Nigeria [10]. Three million of the estimated 8.9 million infants in  
49 the WHO African Region who did not receive any measles containing vaccine in 2015 live in Nigeria [11]. Hence, Nigeria  
50 accounts for nearly 40% of the 28,279 confirmed measles cases reported from the WHO African Region in 2016 [12].  
51

52  
53 The Expanded Program on Immunization in Nigeria, created in 1979, had a significant impact during the first few years with  
54 immunization coverage peaking at 81.5% in 1990 [13–15]. Immunization coverage plummeted to 12.3% in 2003 [15], due to a  
55 myriad of factors including low government commitment to EPI policy, over-centralization in the administration of EPI at the  
56 federal level, collapse of the primary healthcare service upon which EPI services were delivered, and vaccination refusal  
57 mostly due to religious beliefs in the northern part of the country [15]. Several strategies were deployed in subsequent years  
58  
59  
60

1 to address the low immunization coverage, including routine immunization strengthening, supplemental immunization  
2 activities, global positioning system tracker, and several community-level interventions [16]. Despite these efforts,  
3 preliminary results of the 2019 National Nutrition and Health Survey suggests a national DTP3 coverage of 67% [17].  
4 However, even the low national immunization coverage rates mask subnational immunization coverage gaps at the state and  
5 local district levels [18]. For example, immunization coverage ranged from 5% to 48% across states in northern Nigeria in the  
6 2018 National Demographic and Health Survey (DHS) [19].  
7  
8

9 The Immunization Agenda 2030 (IA2030) is a global strategy led by the World Health Organization (WHO) to ensure every  
10 child is protected by full immunization, regardless of location, age, socioeconomic status, or gender-related barriers by 2030  
11 [20]. Despite overall improvements in immunization coverage at the national level [21], geographic variations in the  
12 immunization coverage persists at most sub-national and district levels [18]. Achieving geographical parity, however,  
13 depends on capturing and understanding local patterns of coverage required to provide optimal, child-focused vaccine  
14 delivery services [1,18]. Also, while nationally representative surveys such as the Demographic and Health Survey (DHS) and  
15 Multiple Indicator Cluster Survey (MICS) have a standardized data collection procedures across countries that is also  
16 consistent over time [22], presenting immunization coverage at national levels fails to capture the all-important local  
17 patterns of coverage required to properly fine-tune vaccine delivery services. Furthermore, relying on sub-national  
18 administrative data for assessing immunization system performance and tracking progress is often fraught with limitations  
19 such as missing data and poor data quality [18,23].  
20  
21

22 This study seeks to identify the factors associated with incomplete immunization at the sub-national level using Enugu State  
23 as point of focus. Enugu State has a high number of unimmunized children[24], and has the lowest proportion of children  
24 with complete immunization in the southeast region [25]. Hence, employing the World Health Organization multi-stage  
25 sampling methods for community survey [26], this study aims to identify the sociodemographic factors associated with  
26 incomplete immunization in children aged 12 to 23 months at a sub-national and local level. Our findings could help tailor  
27 strategies and operational plans to address immunization gaps and reach children in every district with life-saving vaccines.  
28  
29  
30  
31

## 32 **Methods**

33  
34 This was a community-based cross-sectional survey of mothers of children 12–23 months old residing in Enugu State in July  
35 2020. The study considered all children 12–23 months old eligible for sampling, and used the Strengthening the Reporting of  
36 Observational Studies in Epidemiology (STROBE) guidelines to ensure appropriate reporting of its study's design, conduct,  
37 and findings [27].  
38

### 39 **Study setting**

40  
41 Nigeria is the most populous country in Africa and the sixth most populous in the world [28]. She is located in Western Africa  
42 and is divided into six geopolitical regions: Northeast, Northwest, Northcentral, Southsouth, Southeast and Southwest. She  
43 has 36 states – the second administrative division, and a federal capital territory in Abuja. Each state is further divided into  
44 smaller administrative units called local government areas (LGA) and each LGA is further divided into wards.  
45

46 Enugu State is one of the 36 states in Nigeria (**Figure 1**) and one of the five states that make up the southeast geopolitical  
47 region in the country. Enugu State is further divided into 17 LGAs, four of which are predominantly urban (Enugu East, Enugu  
48 North, Enugu South, and Nsukka) and the rest are predominantly rural. Enugu State's 2020 projected population is 4,769,916,  
49 with most of the population living in urban centres in Enugu and Nsukka [29,30].  
50

### 51 **Sample size**

52  
53 Using steps described in the WHO Vaccination Coverage Cluster Surveys Reference Manual 2019 [26], we determined the  
54 sample size using immunization coverage of 36.0% obtained for Enugu State in the most recent 2018 Nigeria DHS [25],  
55 significance level of 5.0%, precision of 5.0%, design effect of 2.5 [31], and an inflation of 15% (to account for non-response).  
56 The calculated minimum sample size was 1,183 which we increased to 1,250 to boost the power of the study.  
57  
58  
59  
60

## 1 **Sampling procedure**

2  
3 We used a three-stage sampling technique. In the first stage, we used a simple random sampling technique by balloting to  
4 select four local government areas: two each from the urban and rural areas of the state. In the second stage, we randomly  
5 selected (by balloting) a total of 50 clusters based on probability-proportional-to- population: 15 clusters from Enugu East  
6 LGA, 15 clusters from Enugu North LGA, and 10 clusters each from Ezeagu LGA and Udenugu LGA. In the third stage, we  
7 selected 25 households in each of the 50 clusters (ward). In each cluster, we selected the first household randomly and  
8 subsequent households contiguously in the right direction until we achieved the required number of households for that  
9 cluster. From each selected household, we selected one eligible child. If a selected household had more than one eligible  
10 child, we selected the youngest child older than 12 months. If a selected household had no eligible child, we visited the next  
11 contiguous household, and selected one eligible child.  
12  
13

## 14 **Data collection**

15  
16 A team of 14 trained community health workers (CHW) collected the data using structured pre-tested interviewer-  
17 administered questionnaires. We constructed the questionnaire from a review of the available literature on immunization  
18 surveys in similar contexts [32–34], and tested it for acceptability and logical structure in a sample of 20 mothers before the  
19 study. Prior to the survey, we trained the team on the study's objectives, interpreting, and extracting data from health  
20 cards/vaccination certificates, sampling techniques, walking distance estimation using Google® Maps mobile app, ethical  
21 issues including the process of taking informed verbal consent, and administration of the questionnaire. We administered the  
22 questionnaire in Igbo (the local language) except for a few non-Igbo speakers whom we administered the questionnaire in  
23 English. The research team directed the questions to the mothers and recorded only their responses.  
24  
25

26 Data we collected include socio-demographic characteristics of mothers and children including maternal healthcare (MHC)  
27 utilization [ante-natal care (ANC), skilled birth attendant (SBA) present at birth, and post-natal care (PNC)], knowledge of  
28 mothers regarding RI, immunization status of children, and reasons for any non-vaccination. If the immunization card was  
29 available, we recorded immunization information of each inoculation the child received. If a child had never received an  
30 immunization card or the mother was unable to present the immunization card to the interviewer, the immunization  
31 data/information for the child was based on the mother's report.  
32  
33

34 We used Google® Map mobile app on smartphones to estimate the walking distance from each study participant's house to  
35 the nearest vaccination center in all but four clusters (in Ezeagu LGA). In these four clusters, we first identified the nearest  
36 routine childhood vaccination point in each cluster and then estimated the walking distance from this nearest vaccination  
37 facility to each household included in the study. To evaluate mothers' knowledge of routine immunization and vaccine-  
38 preventable diseases, the interviewers asked questions on the correct purpose of immunization, different vaccine-  
39 preventable diseases, the correct age for receiving the vaccines, and the total number of visits required to complete the  
40 recommended vaccination for the child. We evaluated the responses as per the National Primary Healthcare Development  
41 Agency routine immunization schedule [35]. We coded correct responses as 2 points, incorrect responses 1 point, 'I do not  
42 know' 0 (zero) point.  
43  
44

## 45 **Outcome variable**

46 We categorized children as fully immunized, partially immunized, or un-immunized (zero-dose) based on the types and doses  
47 of antigens received. We defined a "fully immunized child" as a child who had received one dose of BCG, three doses of polio  
48 vaccine (excluding OPV given at birth), three doses of pentavalent vaccine, and one dose of measles vaccine by 12 months of  
49 age. Likewise, we defined a partially immunized child as a child who missed at least any one of the above doses, and an "un-  
50 immunized" or "zero-dose" child as a child who had not received any vaccine by 12 months of age [36]. Incomplete  
51 immunization, in this study, includes partially immunized children and unimmunized (zero-dose) children. Immunization  
52 status was based on mothers' recall and immunization card record (that is, where the mother presents an immunization  
53 card, the child's immunization status is based on records in the card, but where an immunization card is not available, the  
54 immunization status is based on mothers' recall) as recommended by the World Health Organization [26]. A number of other  
55  
56  
57  
58  
59  
60

1 studies have used this method [32,37], which has proven to be a reliable assessment of immunization coverage [38–40]. We  
2 did not include Vitamin A and Yellow fever vaccines in determining complete immunization status for this study.  
3

#### 4 **Data analysis**

5  
6 We entered the data into Microsoft Excel® (Microsoft, Redmond, WA, USA), cleaned and transferred to IBM SPSS® version  
7 27.0 (IBM, Armonk, NY, USA) for statistical analyses. We used frequency and percentage to describe the data, and Chi-square  
8 test to test for statistical significance. We used t-test to assess for statistical difference in the mean scores for knowledge of  
9 routine immunization. We conducted multivariate logistics regression analyses to estimate adjusted odds ratios with 95 %  
10 Confidence Interval (CI) while adjusting for mothers age, marital status, mothers educational status, mothers occupation,  
11 religion, ethnic/tribal group, family monthly income, sex of the index child, and source of information on immunization. We  
12 dichotomized aggregate scores for questions on awareness of routine immunization into satisfactory knowledge (10 points  
13 and above) and poor knowledge (less than 10 points) prior to inclusion in the regression model. We used P<0.05 to define  
14 statistical significance, and all tests were two-tailed.  
15

#### 16 **Patient and Public Involvement**

17  
18 No patients nor the public were involved in developing the research question and study design or in the implementation of  
19 the study design, the interpretation of the results and writing of the manuscript. There are no plans to share the study with  
20 patients, will share with the public through open access publishing.  
21  
22  
23

#### 24 **Results**

##### 25 **Socio-demographic characteristics of mothers and children**

26  
27 We interviewed 1,254 distinct mothers with mean (SD) age of 28.7 (4.3) years. Forty-eight percent of mothers were aged 20  
28 – 29 years old, about 89.9% were married, 93.9% had at least secondary education or higher, and about three-quarters  
29 (75.5%) were employed. The mean (SD) age of the children was 16.8 (3.3) months, the age ranged from 12 to 23 months, and  
30 about half (51.0%) were girls – **Table 1**.  
31  
32  
33

##### 34 **Full immunization coverage (FIC) rate**

35  
36 The FIC rate in Enugu State was 78.9% (95% CI = 76.5% – 81.1%), the partially immunized rate was 15.7% (95% CI = 13.7% –  
37 17.8%), while the unimmunized (zero-dose) rate was 5.4% (95% CI = 4.2% – 6.8%) – **Table 2**. Vaccination coverage rates for  
38 Yellow fever vaccine and Vitamin A supplement were 86.2% (95% CI = 84.2% – 88.1%) and 84.4% (82.3% – 86.4%),  
39 respectively. DPT3 vaccination coverage rate, which is Pentavalent-3 coverage rate in this study, was 83.9% (95% CI = 81.7% –  
40 85.9%).  
41

42  
43 Immunization coverage rates differed based on the rurality-urbanity of communities in the state. FIC rate was 94.5% (95% CI  
44 = 92.7% – 96.1%) in urban communities and 55.5% (95% CI = 51.0% – 59.9%) in rural communities. In both urban and rural  
45 communities, the proportion of children vaccinated with antigens given at birth and six weeks of age were more than the  
46 proportions of children vaccinated with antigens given at later ages. Of the 1,254 children, 578 possessed immunization  
47 cards, indicating an immunization card retention rate of 48.7% (95% CI = 45.9% - 51.6%). About two-fifth of unvaccinated  
48 (zero-dose) children were not vaccinated because vaccination sites were too far while another two-fifth reported absence of  
49 vaccines in the health facility (**Supplement 1**).  
50

##### 51 **Factors associated with immunization status**

52  
53 **Table 3** shows results from a bivariate analysis of maternal health care utilization history and knowledge of routine  
54 immunization. Use of skilled birth attendants (SBA) during delivery of index child, and reception of postnatal care (at least  
55 one postnatal visit) were statistically significant factors associated with incomplete immunization. Insufficient knowledge of  
56 routine immunization was also statistically significantly associated with incomplete immunization.  
57  
58  
59



Multivariate logistic regression model was statistically significant,  $\chi^2(25) = 24.217$ ,  $p = 0.002$ . The model explained 57.0% (Nagelkerke  $R^2$ ) of the variance in immunization status and correctly classified 90.7% of cases. Single mothers (aOR = 5.74, 95% CI = 1.45 – 22.76), mothers who delivered without SBA (aOR = 1.93, 95% CI = 1.24 – 2.99), mothers who did not receive any postnatal care (aOR = 6.53, 95% CI = 4.17 – 10.22), and mothers with poor knowledge of routine immunization (aOR = 1.76, 95% CI = 1.09 – 2.87) were significant factors associated with incomplete immunization – **Table 4**. Community level factors associated with incomplete immunization were rural community (aOR = 7.49, 95% CI = 4.84 – 11.59), low-income households (aOR = 1.56, 95% CI = 1.17 – 2.81), and living further than 30 minutes walking distance from the nearest vaccination facility (aOR = 2.15, 95% CI = 1.31 – 3.52).

## Discussion

This study evaluated immunization coverage data in urban and rural areas of Enugu State and offers a close-up assessment of sociodemographic factors associated with incomplete immunization at the sub-national and local level. There are four main findings from this study. First, this assessment of immunization coverage of children aged 12-23 months in 50 randomly selected wards in rural and urban districts (LGA) in Enugu State found FIC rate in Enugu state to be low, below the RED's subnational target of 80% immunization coverage. About one in five (21.1%) children aged 12-23 months in the state were not fully immunized. This suggests that even after almost two decades of implementing the RED strategy in Nigeria, some states in the southern region with purportedly high immunization coverage [14] did not yet meet the (RED's) subnational immunization target. This partially explains why huge investments in immunization activities have had minimal impact on the incidence of vaccine preventable diseases in Enugu State [41].

The FIC rate in this study is higher than FIC rates reported in other sub-regions in Nigeria [33,41], and Ethiopia [42,43], and lower than FIC rates reported in Cameroon [37] and Ghana [44]. The FIC rate is also substantially higher than the FIC rate reported for Enugu State (36.4%) in the latest (2018) Nigeria DHS [25]. There are three possible reasons for this difference. The first reason relates to the definition of FIC: FIC was defined for DHS as having received one dose of BCG, one dose of measles, three doses of DPT, and three doses of OPV vaccines ([25], pg. 224). FIC for this study was likewise defined as in DHS, but for OPV, we defined as three doses of polio vaccine instead, that is either three doses of OPV or two doses of OPV and one dose of IPV [42], in line with the Polio Endgame Strategy 2019-2023 [43]. To illustrate how the difference in FIC definition drives the overall rates, we calculated FIC by applying our definition to the DHS data which shows that FIC rates in the current study and DHS are within 11 percentage points when our definition of FIC is used (**Supplement 2**). Additionally, difference in the sampling approaches used in our study and DHS, and the resulting differences in the characteristics of the sample could explain some of the difference. A comparison of demographic characteristics of our sample with that of the DHS sample (in Enugu state) shows that mothers in our sample are more educated and more likely to be working (**Supplement 3**). It is reasonable to expect a higher FIC among these mothers [10,34]. Strikingly, children in our sample are of lower birth order than in the DHS and disproportionately from rural area. It appears that higher vaccination rates among younger more educated and working mothers is less than offset by lower vaccination rate among children of lower birth order and those from rural areas. Finally, a portion of the difference could be due to the State Government's recent efforts to boost vaccination coverage in the state since the 2018 Nigeria DHS [24].

Secondly, further analysis based on rurality of residence reveals stark disparity in the FIC rate between urban communities and rural communities. Urban communities had a substantially higher FIC rate (94.5%) than rural communities (55.5%). This observation is consistent with findings in other sub-regions in Nigeria [44,45], and Ethiopia [46,47], but differs with findings in Bayelsa State, Nigeria where immunization coverage was higher in the rural community than in the urban community [48]. Our data show that almost half of infants in rural communities miss out on at least one of the critical life-saving BCG, Pentavalent, Polio, and Measles vaccines. This finding underscores the importance of monitoring data at sub-district levels to identify vaccination gaps and tailor operational strategies accordingly.

Thirdly, the low DPT-3 coverage in rural communities (63.0%) points to gaps in routine immunization delivery in those communities and is consistent with a study conducted in another rural community in Enugu [49]. Furthermore, the immunization dropout rate in both urban and rural communities is low, below the 10% cut-off recommended by WHO [50].

1 The low immunization dropout rate (< 10.0%) and the low DPT-1 coverage in rural communities (78.5%) together suggests  
2 that access to routine immunization services in these contexts remains a problem [50], as a previous study have suggested  
3 [49]. There are many factors responsible for the rural-urban differences in access. For example, vaccination points are more  
4 geographically accessible to families in urban communities than in rural communities [10,51,52], rural communities incur  
5 higher travel costs to reach vaccination points[52], and rural communities are less aware of the importance of  
6 immunization[10,44].  
7

8  
9 Finally, marital status, MHC utilization, poor knowledge of routine immunization, poor family income, and geographical  
10 accessibility were associated with incomplete immunization at the district level. Children of single mothers are less likely to  
11 be fully immunized compared to married mothers. Married mothers are more financially stable and most likely to discuss the  
12 health needs of their children, including immunization [51,53]. Also, stigma, psychological trauma, and hardship associated  
13 with single motherhood in these context negatively impacts access to health and vaccination [51,53]. MHC utilization also  
14 significantly predicts incomplete immunization. Mothers who give birth using SBA are more likely to have them fully  
15 immunized than mothers who did not use SBA. Likewise, mothers who receive PNC care are more likely to have their children  
16 fully immunized. This is consistent with several studies in other LMICs that demonstrate that increased health  
17 communications on immunization during MHC utilization was significantly associated with childhood immunization [51,54].  
18 However, given that the sequence of MHC utilization is ANC-SBA-PNC, the absence of a significant effect for ANC in this study  
19 does not imply that adequate ANC attendance is not associated with routine immunization. Instead, our data suggest that  
20 other factors such as accessibility to health facilities could have a stronger association with routine immunization than  
21 adequately attending ANC [55].  
22

### 23 **Strengths and limitations**

24  
25 Our study extends the body of knowledge on immunization uptake in rural areas vis-à-vis urban areas at the subnational  
26 level, our results can be generalized to similar contexts in Nigeria and beyond and provides important evidence to  
27 policymakers and program managers for improving immunization coverage. However, our study is not without limitations.  
28 First, health system factors including vaccine availability, health care personnel, and logistics [56,57], which are known to  
29 influence uptake of immunization coverage were not adequately explored. Also, paternal factors that may influence the  
30 completion of immunization were not evaluated [51]. However, the primary goal of this study was not to assess the effect of  
31 these factors. Secondly, new vaccines recently introduced into the Nigeria routine immunization schedule (specifically,  
32 Rotavirus vaccine and Pneumococcal Conjugate Vaccine (PCV)) were not explored [58,59]. Thirdly, although maternal recall  
33 has been shown to be a reliable estimate of maternal recall in Senegal, Ethiopia, and Tanzania [38–40], there is little evidence  
34 that it is a reliable coverage measure in Nigeria. A similar study in Osun State showed that agreement between the mothers'  
35 recall and immunization card assessment was low [33]. This (maternal recall) could have also biased our estimates. Finally,  
36 pockets of hard-to-reach Fulani settlements that have been shown to have poor immunization coverage were not included in  
37 our sample [60]. Due to the deteriorating security situation in the country and the absence of security assurances, we could  
38 not send data collectors to these settlements.  
39

### 40 **Policy implications**

41  
42 Our study findings have policy implications for vaccination delivery in low- and middle-income countries attempting to  
43 improve national and subnational immunization coverage. Innovative solutions to improve geographical accessibility are  
44 undoubtedly needed to achieve IA2030 targets at local levels. Also, our study found that mothers who used MHC services  
45 were significantly more likely to have full immunized children suggesting that improving MHC utilization, especially in  
46 underserved rural communities, might be an effective strategy in achieving the IA2030 national and sub-national targets [54].  
47 However, further studies, preferably randomized controlled trials, are needed to confirm if strategies aimed at improving  
48 MHC utilization actually improve immunization rate. Lastly, our study demonstrates the importance of reporting vaccination  
49 coverage at the local/district level to draw attention to regional inequities at that level and identify regions/districts for more  
50 targeted interventions.  
51  
52  
53  
54

### 55 **Conclusions**

1 The FIC rate in rural communities in Enugu State is below the RED target of 80% for all antigens by 2020. About one in two  
2 children in rural communities in Enugu State is not fully immunized. Socio-demographic factors associated with full  
3 immunization at the sub-national level are single motherhood, maternal healthcare utilization, family income, rural  
4 residence, and geographical proximity to health facilities.  
5  
6  
7  
8  
9  
10  
11  
12  
13  
14  
15  
16  
17

#### 18 List of abbreviations

|    |               |                                  |
|----|---------------|----------------------------------|
| 19 | <b>ANC</b>    | Antenatal care                   |
| 20 |               |                                  |
| 21 | <b>BCG</b>    | Bacille Calmette Guerin          |
| 22 |               |                                  |
| 23 | <b>DPT</b>    | Diphtheria-Pertussis-Tetanus     |
| 24 |               |                                  |
| 25 | <b>EPI</b>    | Expanded program on immunization |
| 26 |               |                                  |
| 27 | <b>FIC</b>    | Full immunization coverage       |
| 28 |               |                                  |
| 29 | <b>IPV</b>    | Inactivated Polio vaccine        |
| 30 |               |                                  |
| 31 | <b>MHC</b>    | Maternal Healthcare              |
| 32 |               |                                  |
| 33 | <b>OPV</b>    | Oral polio vaccine               |
| 34 |               |                                  |
| 35 | <b>PNC</b>    | Postnatal care                   |
| 36 |               |                                  |
| 37 | <b>SBA</b>    | Skilled birth attendant          |
| 38 |               |                                  |
| 39 | <b>TT</b>     | Tetanus toxoid                   |
| 40 |               |                                  |
| 41 | <b>UNICEF</b> | United Nations Children's Fund   |
| 42 |               |                                  |
| 43 | <b>WHO</b>    | World Health Organization        |
| 44 |               |                                  |
| 45 |               |                                  |
| 46 |               |                                  |
| 47 |               |                                  |
| 48 |               |                                  |
| 49 |               |                                  |
| 50 |               |                                  |
| 51 |               |                                  |
| 52 |               |                                  |
| 53 |               |                                  |
| 54 |               |                                  |
| 55 |               |                                  |
| 56 |               |                                  |
| 57 |               |                                  |
| 58 |               |                                  |
| 59 |               |                                  |
| 60 |               |                                  |

## Declarations

### Ethics approval and consent to participate

Ethical approval for the study was obtained from the Ethical Committee of the Enugu State University Teaching Hospital – Reference number: ESUTHP/C-MAC/RA/034/Vol1/264. Permission was also obtained from the State Ministry of Health, Enugu.

Informed verbal consent was obtained from each mother before participating in the study. Verbal consent was deemed appropriate and approved by the ethics committee. Informed verbal consent consisted of a description of the objectives of the study, assurance of confidentiality of personal information, and a specific request for permission to conduct the interview. Consent was obtained in Igbo (the local language) except for a few non-Igbo speaker whose consent was obtained in English. Where the mother was less than 18 years, consent to participate in the study was obtained from the husband (if mother was married) or from the mother's mother/father (if the mother was single).

Children with zero or incomplete immunization were referred to the nearest health center for vaccination. All patient identifiers were removed prior to statistical analysis.

### Consent for publication

Not applicable

### Availability of data and materials

The dataset generated and analyzed in this study is freely available from the corresponding author on reasonable request or directly from the data repository, Zenodo; <http://doi.org/10.5281/zenodo.4294847>

### Competing interests

None declared.

### Funding

This research received no specific grant from any funding agency in the public, commercial or not-for-profit sectors'

### Author contributions

PE and YA conceptualized the study, oversaw its conduct, analyzed the data, interpreted the results, drafted the original article, and reviewed the final draft. UJA, CLA, SAA, and LOL contributed to the collection and analysis of the data, interpretation of the results, and review of the final draft. All authors read and approved the final manuscript.

### Acknowledgements

The authors are immensely grateful to Mrs Priscilla Aniekwe and George Okafor for invaluable assistance with the data collection. We are also indebted to our team of community social workers without whom this study would not have been possible.

### Authors' information (optional)

Not applicable

1  
2  
3  
4  
5  
6  
7  
8  
9  
10  
11  
12  
13  
14  
15  
16  
17  
18  
19  
20  
21  
22  
23  
24  
25  
26  
27  
28  
29  
30  
31  
32  
33  
34  
35  
36  
37  
38  
39  
40  
41  
42  
43  
44  
45  
46  
47  
48  
49  
50  
51  
52  
53  
54  
55  
56  
57  
58  
59  
60

**Caption for Figure 1**

**Figure 1: Map of Nigeria above showing Enugu State and Map of Enugu state showing the study area (four LGAs).**

Adapted from image culled from Ugoyibo OV, Amaechi IF, Obinna AC. Evaluation of Groundwater Pollution Sources in Enugu North LGA of Enugu State , Nigeria. IJSAR J Environ Earth Phys Sci. 2015;2(3):54–69.

For peer review only

## References

1. World Health Organization. Immunization coverage [Internet]. Fact sheets. 2020 [cited 2020 Aug 22]. Available from: <https://www.who.int/news-room/fact-sheets/detail/immunization-coverage>
2. United Nations Children Fund (UNICEF). Immunization [Internet]. UNICEF Data: Monitoring the situation of children and women. 2020 [cited 2020 Aug 2]. Available from: <https://data.unicef.org/topic/child-health/immunization/>
3. Orensteina WA, Ahmed R. Simply put: Vaccination saves lives. *Proc Natl Acad Sci*. 2017;114(16):4031–3.
4. Rémy V, Zöllner Y, Heckmann U. Vaccination: the cornerstone of an efficient healthcare system. *J Mark Access Heal Policy*. 2015;3(1):27041.
5. Zhou F, Shefer A, Wenger J, Messonnier M, Wang LY, Lopez A, et al. Economic evaluation of the routine childhood immunization program in the united states, 2009. *Pediatrics*. 2014;133(4):577–85.
6. Bärnighausen T, Bloom DE, Canning D, Friedman A, Levine OS, O'Brien J, et al. Rethinking the benefits and costs of childhood vaccination: The example of the Haemophilus influenzae type b vaccine. *Vaccine*. 2011;29(13):2371–80.
7. Armstrong EP. Economic benefits and costs associated with target vaccinations. In: *Journal of Managed Care Pharmacy*. 2007. p. 12–5.
8. Zhou F, Santoli J, Messonnier ML, Yusuf HR, Shefer A, Chu SY, et al. Economic evaluation of the 7-vaccine routine childhood immunization schedule in the United States, 2001. *Arch Pediatr Adolesc Med*. 2005;159(12):1136–44.
9. Greenwood B. The contribution of vaccination to global health: Past, present and future. *Philos Trans R Soc B Biol Sci*. 2014;369(1645):1–5.
10. Obanewa OA, Newell ML. The role of place of residency in childhood immunisation coverage in Nigeria: Analysis of data from three DHS rounds 2003–2013. *BMC Public Health*. 2020;20(1):1–13.
11. Masresha BG, Dixon MG, Kriss JL, Katsande R, Shibeshi ME, Luce R, et al. Progress Toward Measles Elimination — African Region , 2013 – 2016. *Morb Mortal Wkly Rep*. 2017;66(17):436–43.
12. Masresha BG, Braka F, Onwu NU, Oteri J, Erbetto T, Oladele S, et al. Progress Towards Measles Elimination in Nigeria: 2012 – 2016. *J Immunol Sci Res [Internet]*. 2018;S(020):135–9. Available from: <http://www.immunologyresearchjournal.com/articles/progress-towards-measles-elimination-in-nigeria-2012--2016.pdf>
13. Adedokun ST, Uthman OA, Adekanmbi VT, Wiysonge CS. Incomplete childhood immunization in Nigeria: A multilevel analysis of individual and contextual factors. *BMC Public Health*. 2017;17(236):1–10.
14. Anyene BC. Routine Immunization in Nigeria: The role of Politics, and Cultural practices. *African J Heal Econ*. 2014;03(1):01–9.
15. Ophori EA, Tula MY, Azih A V, Okojie R, Ikpo EP. Current trends of immunization in Nigeria: Prospect and challenges. *Trop Med Health*. 2014;42(2):67–75.
16. Adeloye D, Jacobs W, Amuta AO, Ogunidipe O, Mosaku O, Gadanya MA, et al. Coverage and determinants of childhood immunization in Nigeria: A systematic review and meta-analysis. *Vaccine [Internet]*. 2017;35(22):2871–81. Available from: <http://dx.doi.org/10.1016/j.vaccine.2017.04.034>
17. World Health Organization, United Nations Children Fund (UNICEF). Nigeria - WHO and UNICEF estimates of immunization coverage, 2019 revision [Internet]. WHO UNICEF Immunization Coverage Estimates. 2020 [cited 2020 Aug 2]. p. 1–33. Available from: [https://www.who.int/immunization/monitoring\\_surveillance/data/nga.pdf](https://www.who.int/immunization/monitoring_surveillance/data/nga.pdf)
18. Mosser JF, Gagne-Maynard W, Rao PC, Osgood-Zimmerman A, Fullman N, Graetz N, et al. Mapping diphtheria-pertussis-tetanus vaccine coverage in Africa, 2000–2016: a spatial and temporal modelling study. *Lancet [Internet]*. 2019;393(10183):1843–55. Available from: [http://dx.doi.org/10.1016/S0140-6736\(19\)30226-0](http://dx.doi.org/10.1016/S0140-6736(19)30226-0)
19. Gunnala R, Ogbuanu IU, Adegoke OJ, Scobie HM, Uba B V, Wannemuehler KA, et al. Routine vaccination coverage in northern nigeria: Results from 40 district-level cluster surveys, 2014–2015. *PLoS One*. 2016;11(12):2014–5.
20. World Health Organization (WHO). Immunization Agenda 2030: A global strategy to leave no one behind [Internet]. 2019. Available from: [https://www.who.int/immunization/ia2030\\_Draft\\_One\\_English.pdf?ua=1](https://www.who.int/immunization/ia2030_Draft_One_English.pdf?ua=1)
21. World Health Organization. The RED strategy [Internet]. Immunization, Vaccines and Biologicals. 2018 [cited 2020 Aug 22]. Available from: [https://www.who.int/immunization/programmes\\_systems/service\\_delivery/red/en/](https://www.who.int/immunization/programmes_systems/service_delivery/red/en/)
22. Corsi DJ, Neuman M, Finlay JE, Subramanian S V. Demographic and health surveys: A profile. *Int J Epidemiol*. 2012;41(6):1602–13.

- 1 23. Dunkle SE, Wallace AS, MacNeil A, Mustafa M, Gasasira A, Ali D, et al. Limitations of using administratively reported immunization  
2 data for monitoring routine immunization system performance in Nigeria. *J Infect Dis.* 2014;210(Suppl 1):S523–30.  
3
- 4 24. World Health Organization. Enugu State inaugurates Task Force on Immunization, to close gaps in immunization coverage  
5 [Internet]. WHO Africa / Nigeria. 2020 [cited 2020 Apr 20]. Available from: [https://www.afro.who.int/news/enugu-state-](https://www.afro.who.int/news/enugu-state-inaugurates-task-force-immunization-close-gaps-immunization-coverage)  
6 [inaugurates-task-force-immunization-close-gaps-immunization-coverage](https://www.afro.who.int/news/enugu-state-inaugurates-task-force-immunization-close-gaps-immunization-coverage)
- 7 25. National Population Commission (NPC) Nigeria, ICF. Nigeria Demographic Health Survey 2018 [Internet]. Abuja, Nigeria and  
8 Rockville, Maryland, USA; 2019. Available from: <https://dhsprogram.com/publications/publication-fr359-dhs-final-reports.cfm>  
9
- 10 26. World Health Organization. World Health Organization Vaccination Coverage Cluster Surveys: Reference Manual [Internet].  
11 Geneva: World Health Organization; 2018. 234 p. Available from:  
12 [https://www.who.int/immunization/documents/who\\_ivb\\_18.09/en/](https://www.who.int/immunization/documents/who_ivb_18.09/en/)
- 13 27. Von Elm E, Altman DG, Egger M, Pocock SJ, Gøtzsche PC, Vandenbroucke JP. The Strengthening the Reporting of Observational  
14 Studies in Epidemiology (STROBE) statement: Guidelines for reporting observational studies. *Epidemiology.* 2007;18(6):800–4.  
15
- 16 28. Ekoh PC, George E, Ejimkaraonye C. Nigeria demographic report: the effect of overpopulation on life expectancy. *African Popul*  
17 *Stud.* 2020;34(1):5106–14.
- 18 29. National Population Commission, National Bureau of Statistics. National, State and Local Government Population Forecasts. Abuja,  
19 Nigeria: National Population Commission; 2016.
- 20 30. Eze P, Agu UJ, Aniebo CL, Agu SA, Lawani LO. Perception and attitudinal factors contributing to periodic deworming of preschool  
21 children in an urban slum, Nigeria. *BMC Public Health.* 2020;20(1):1–12.  
22
- 23 31. Odusanya OO, Alufohai EF, Meurice FP, Ahonkhai VI. Determinants of vaccination coverage in rural Nigeria. *BMC Public Health.*  
24 2008;8:1–8.  
25
- 26 32. Uzochukwu BS, Okeke CC, Enzuladu E, Mbachu C, Okwuosa C, Onwujekwe OE. Inequity in access to childhood immunization in  
27 Enugu urban, Southeast Nigeria. *Niger J Clin Pract.* 2017;20(8):971–7.
- 28 33. Adedire EB, Ajayi I, Fawole OI, Ajumobi O, Kasasa S, Wasswa P, et al. Immunisation coverage and its determinants among children  
29 aged 12-23 months in Atakumosa-west district , Osun State Nigeria : a cross-sectional study. *BMC Public Health [Internet].*  
30 2016;16(905):1–8. Available from: <http://dx.doi.org/10.1186/s12889-016-3531-x>
- 31 34. Gidado S, Nguku P, Biya O, Waziri NE, Mohammed A, Nsubuga P. Determinants of routine immunization coverage in Bungudu ,  
32 Zamfara State , Northern Nigeria , May 2010. *Pan Afr Med J.* 2014;18(Suppl 1):1–5.  
33
- 34 35. National Primary Healthcare Development Agency (NPHCDA). National Immunization Schedule in Nigeria [Internet]. Publications.  
35 2018 [cited 2020 Jun 22]. Available from: [https://nphcda.gov.ng/wp-content/uploads/delightful-downloads/2018/01/National-](https://nphcda.gov.ng/wp-content/uploads/delightful-downloads/2018/01/National-Immunization-Schedule-in-Nigeria.pdf)  
36 [Immunization-Schedule-in-Nigeria.pdf](https://nphcda.gov.ng/wp-content/uploads/delightful-downloads/2018/01/National-Immunization-Schedule-in-Nigeria.pdf)
- 37 36. World Health Organization. Fully Immunized Child Rate [Internet]. The Global Health Observatory. 2020 [cited 2020 Aug 20].  
38 Available from: <https://www.who.int/data/gho/indicator-metadata-registry/imr-details/3376>  
39
- 40 37. Russo G, Miglietta A, Pezzotti P, Biguioh RM, Bouting Mayaka G, Sobze MS, et al. Vaccine coverage and determinants of  
41 incomplete vaccination in children aged 12-23 months in Dschang, West Region, Cameroon: A cross-sectional survey during a polio  
42 outbreak. *BMC Public Health.* 2015;15(1):1–11.
- 43 38. Seror V, Cortaredona S, Ly EY, Ndiaye S, Gaye I, Fall M, et al. Vaccination card availability and childhood immunization in Senegal.  
44 *BMC Public Health.* 2020;20(1):1–13.  
45
- 46 39. Porth JM, Wagner AL, Tefera YA, Boulton ML. Childhood immunization in Ethiopia: Accuracy of maternal recall compared to  
47 vaccination cards. *Vaccines.* 2019;7(2):1–12.
- 48 40. Binyaruka P, Borghi J. Validity of parental recalls to estimate vaccination coverage: Evidence from Tanzania. *BMC Health Serv Res.*  
49 2018;18(1):1–9.  
50
- 51 41. Chukwuemeka EEO, Aduma A, Ezeigwe FO. A Re-Interrogation of Immunization Programme in Enugu State Nigeria : Impediments  
52 and Way Forward. *J Public Manag Res.* 2019;5(1):45–61.
- 53 42. Polio Global Eradication Initiative and Expanded Programme on Immunization (EPI). Polio and the Introduction of IPV [Internet].  
54 2014 [cited 2021 Apr 22]. Available from:  
55 [https://www.who.int/immunization/diseases/poliomyelitis/inactivated\\_polio\\_vaccine/Key\\_mess\\_FAQs.pdf](https://www.who.int/immunization/diseases/poliomyelitis/inactivated_polio_vaccine/Key_mess_FAQs.pdf)  
56
- 57 43. World Health Organization (WHO). Polio Endgame Strategy 2019-2023: Eradication, integration, certification and containment.  
58 World Heal Organ [Internet]. 2019;64. Available from: <http://polioeradication.org/wp-content/uploads/2019/06/english-polio->  
59



1 endgame-strategy.pdf  
2

- 3 44. Olugbenga-Bello A, Jimoh A, Oke O, Oladejo R. Maternal characteristics and immunization status of children in north central of  
4 Nigeria. *Pan Afr Med J.* 2017;26(159):1–15.
- 5 45. Brown VB, Oluwatosin OA. Socio-demographic factors associated with childhood immunization uptake in Akinyele Local  
6 Government Area, Oyo State, Nigeria. *African J Med Med Sci.* 2012;41(2):161–7.
- 7 46. Kassahun MB, Biks GA, Teferra AS. Level of immunization coverage and associated factors among children aged 12-23 months in  
8 Lay Armachiho District, North Gondar Zone, Northwest Ethiopia: a community based cross sectional study. *BMC Res Notes.*  
9 2015;8(1):1–10.
- 10 47. Mohamud AN, Feleke A, Worku W, Kifle M, Sharma HR. Immunization coverage of 12-23 months old children and associated  
11 factors in Jigjiga District, Somali National Regional State, Ethiopia. *BMC Public Health.* 2014;14(1):1–9.
- 12 48. Itimi K, Dienye PO, Ordinioha B. Community participation and childhood immunization coverage: A comparative study of rural and  
13 urban communities of Bayelsa State, south-south Nigeria. *Niger Med J.* 2012;53(1):21–5.
- 14 49. Chinawa JM. Immunization dropout rates in Ihe, Awgu Local Government Area, Enugu State, South East Nigeria: A 1 year Review.  
15 *Ann Med Heal Sci Res.* 2014;4(4):642–6.
- 16 50. World Health Organization / United Nations Children’s Fund. Increasing immunization coverage at the health facility level  
17 [Internet]. *Vaccines and Biologicals.* 2002 [cited 2020 Aug 24]. Available from:  
18 [https://apps.who.int/iris/bitstream/handle/10665/67791/WHO\\_V&B\\_02.27.pdf?sequence=1](https://apps.who.int/iris/bitstream/handle/10665/67791/WHO_V&B_02.27.pdf?sequence=1)
- 19 51. Bangura JB, Xiao S, Qiu D, Ouyang F, Chen L. Barriers to childhood immunization in sub-Saharan Africa: A systematic review. *BMC*  
20 *Public Health.* 2020;20(1).
- 21 52. Sibeudu FT, Uzochukwu BS, Onwujekwe OE. Rural–urban comparison of routine immunization utilization and its determinants in  
22 communities in Anambra States, Nigeria. *SAGE Open Med.* 2019;7:205031211882389.
- 23 53. Baguune B, Ndago JA, Adokoya MN. Immunization dropout rate and data quality among children 12-23 months of age in Ghana.  
24 *Arch Public Heal.* 2017;75(1):1–8.
- 25 54. Anichukwu OI, Asamoah BO. The impact of maternal health care utilisation on routine immunisation coverage of children in  
26 Nigeria: A cross-sectional study. *BMJ Open.* 2019;9(6):1–11.
- 27 55. Huldah Ijeoma N. Use of Telephone Calls in Reduction of Dropout Rate of Routine Immunization in a Tertiary Health Facility in  
28 South Eastern Nigeria. *Eur J Prev Med.* 2015;3(3):39.
- 29 56. Gooding E, Spiliotopoulou E, Yadav P. Impact of vaccine stockouts on immunization coverage in Nigeria. *Vaccine* [Internet].  
30 2019;37(35):5104–10. Available from: <https://doi.org/10.1016/j.vaccine.2019.06.006>
- 31 57. Burnett RJ, Mmoledi G, Ngcobo NJ, Dochez C, Seheri LM, Mphahlele MJ. Impact of vaccine stock-outs on infant vaccination  
32 coverage: A hospital-based survey from South Africa. *Int Health.* 2018;10(5):376–81.
- 33 58. World Health Organization. Nigeria to avert over 160,000 deaths in children yearly, with introduction of rotavirus vaccine into  
34 immunization schedule [Internet]. *WHO Africa / Nigeria.* 2018 [cited 2020 Aug 22]. Available from:  
35 <https://www.afro.who.int/news/nigeria-avert-over-160000-deaths-children-yearly-introduction-rotavirus-vaccine-immunization>
- 36 59. World Health Organization. Nigeria Introduces New Vaccine – PCV 10 [Internet]. *WHO Africa / Nigeria.* 2014 [cited 2020 Aug 22].  
37 Available from: <https://www.afro.who.int/news/nigeria-introduces-new-vaccine-pcv-10#:~:text=On 22nd December 2014>  
38 the,caused by the pneumococcal bacteria.
- 39 60. Okeibunor JC, Onyeneho NG, Nwaorgu OC, l’Aronu N, Okoye I, Iremeka FU, et al. Prospects of using community directed  
40 intervention strategy in delivering health services among Fulani Nomads in Enugu State, Nigeria. *Int J Equity Health.* 2013;12(1):1–  
41 17.
- 42  
43  
44  
45  
46  
47  
48  
49  
50  
51  
52  
53  
54  
55  
56  
57  
58  
59  
60



**Table 1:** Socio-demographic characteristics of mother and children in Enugu State, Nigeria, July 2020

| Socio-demographic characteristics                                       | Frequency<br>(N = 1,254) | Proportion<br>(%) |
|-------------------------------------------------------------------------|--------------------------|-------------------|
| <b>Mothers' age</b>                                                     |                          |                   |
| – < 20 years                                                            | 54                       | 4.3%              |
| – 20 – 29 years                                                         | 602                      | 48.0%             |
| – ≥ 30 years                                                            | 598                      | 47.7%             |
| <b>Marital status</b>                                                   |                          |                   |
| – Single                                                                | 50                       | 4.0%              |
| – Currently Married                                                     | 1127                     | 89.9%             |
| – Divorced/Widowed                                                      | 77                       | 7.1%              |
| <b>Mothers' education</b>                                               |                          |                   |
| – Primary or lower                                                      | 77                       | 6.1%              |
| – Secondary or higher                                                   | 1177                     | 93.9%             |
| <b>Mothers' working status</b>                                          |                          |                   |
| – Stay-at-home/Housewife                                                | 307                      | 24.5%             |
| – Working mom                                                           | 947                      | 75.5%             |
| <b>Religion</b>                                                         |                          |                   |
| – Christian                                                             | 1,214                    | 96.8%             |
| – Islam/Muslim                                                          | 20                       | 1.6%              |
| – African Traditional Religion                                          | 20                       | 1.6%              |
| <b>Family monthly income **</b>                                         |                          |                   |
| – < N40,000 (Approx. US \$100)                                          | 544                      | 43.4%             |
| – N40,000 – N79,999                                                     | 416                      | 33.2%             |
| – N80,000 – N119,999                                                    | 256                      | 20.4%             |
| – ≥ N120,000                                                            | 38                       | 3.0%              |
| <b>Ethnic group</b>                                                     |                          |                   |
| – Igbo                                                                  | 1201                     | 95.8%             |
| – Others                                                                | 53                       | 4.2%              |
| <b>Sex/gender of child</b>                                              |                          |                   |
| – Female                                                                | 640                      | 51.0%             |
| – Male                                                                  | 614                      | 49.0%             |
| <b>Birth order of child</b>                                             |                          |                   |
| – First born                                                            | 347                      | 27.7%             |
| – Second or third                                                       | 625                      | 49.8%             |
| – Others                                                                | 282                      | 22.5%             |
| <b>Residence/Community</b>                                              |                          |                   |
| – Rural                                                                 | 503                      | 40.1%             |
| – Urban                                                                 | 751                      | 59.9%             |
| <b>Walking distance to nearest health facility</b>                      |                          |                   |
| – < 30-minutes' walk                                                    | 546                      | 43.5%             |
| – ≥ 30-minutes' walk                                                    | 708                      | 56.5%             |
| <b>Source of information on Immunization</b> (more than source applies) |                          |                   |
| – Hospital/Health facility                                              | 913                      | 72.8%             |

|   |                               |     |       |
|---|-------------------------------|-----|-------|
| 1 | – Family/friends              | 789 | 62.9% |
| 2 | – Church/Mosque               | 328 | 26.2% |
| 3 | – TV, Radio, and social media | 193 | 15.4% |
| 4 |                               |     |       |

5 \*\* 1 USD = N400.00 on the Currency exchange market in July 2020; [www.oanda.com](http://www.oanda.com)

6  
7  
8  
9  
10  
11  
12  
13  
14  
15  
16  
17  
18  
19  
20  
21  
22  
23  
24  
25  
26  
27  
28  
29  
30  
31  
32  
33  
34  
35  
36  
37  
38  
39  
40  
41  
42  
43  
44  
45  
46  
47  
48  
49  
50  
51  
52  
53  
54  
55  
56  
57  
58  
59  
60

For peer review only

**Table 2:** Immunization coverage for routine immunization (RI) antigens in Enugu State, Nigeria, July 2020

| RI Antigen                               | State-wide Coverage<br>N = 1,254<br>n, (%), [95% CI]) | Coverage in Urban<br>communities<br>N = 751<br>n, (%), [95% CI]) | Coverage in Rural<br>communities<br>N = 503<br>n, (%), [95% CI]) |
|------------------------------------------|-------------------------------------------------------|------------------------------------------------------------------|------------------------------------------------------------------|
| Antigens administered at birth           |                                                       |                                                                  |                                                                  |
| – BCG <sup>##</sup>                      | 1,136 (90.6%, [88.8% – 92.1%])                        | 741 (98.7%, [97.6% – 99.4%])                                     | 395 (78.5%, [74.7% – 82.0%])                                     |
| Antigens administered at 6 weeks         |                                                       |                                                                  |                                                                  |
| – OPV 1                                  | 1,137 (90.7%, [88.9% – 92.2%])                        | 742 (98.8%, [97.7% – 99.5%])                                     | 395 (78.5%, [74.7% – 82.0%])                                     |
| – Penta 1                                | 1,136 (90.6%, [88.8% – 92.1%])                        | 738 (98.3%, [97.1% – 99.1%])                                     | 398 (79.1%, [75.2% – 82.7%])                                     |
| Antigens administered at 10 weeks        |                                                       |                                                                  |                                                                  |
| – OPV 2                                  | 1,083 (86.4%, [84.3% – 88.2%])                        | 741 (98.7%, [97.6% – 99.4%])                                     | 342 (68.0%, [63.7% – 72.1%])                                     |
| – Penta 2                                | 1,090 (86.9%, [84.9% – 88.7%])                        | 736 (98.0%, [96.7% – 98.9%])                                     | 354 (70.4%, [66.2% – 74.3%])                                     |
| Antigens administered at 14 weeks        |                                                       |                                                                  |                                                                  |
| – OPV 3 <sup>##</sup>                    | 1,042 (83.1%, [80.9% – 85.1%])                        | 740 (98.5%, [97.4% – 99.3%])                                     | 302 (60.0%, [55.6% – 64.3%])                                     |
| – Penta 3 <sup>##</sup>                  | 1,052 (83.9%, [81.7% – 85.9%])                        | 735 (97.9%, [96.6% – 98.8%])                                     | 317 (63.0%, [58.6% – 67.3%])                                     |
| Antigens administered at 9 months        |                                                       |                                                                  |                                                                  |
| – Measles <sup>##</sup>                  | 1,101 (87.8%, [85.9% – 89.6%])                        | 716 (95.3%, [93.6% – 96.7%])                                     | 385 (76.5%, [72.6% – 80.2%])                                     |
| – Yellow fever                           | 1,081 (86.2%, [84.2% – 88.1%])                        | 720 (95.9%, [94.2% – 97.2%])                                     | 361 (71.8%, [67.6% – 75.7%])                                     |
| Supplements                              |                                                       |                                                                  |                                                                  |
| – Vitamin A                              | 1,059 (84.4%, [82.3% – 86.4%])                        | 721 (96.0%, [94.3% – 97.3%])                                     | 338 (67.2%, [62.9% – 71.3%])                                     |
| <b>Immunization status <sup>##</sup></b> |                                                       |                                                                  |                                                                  |
| – Fully immunized                        | 989 (78.9%, [76.5% – 81.1%])                          | 710 (94.5%, [92.7% – 96.1%])                                     | 279 (55.5%, [51.0% – 59.9%])                                     |
| – Partially immunized                    | 197 (15.7%, [13.7% – 17.8%])                          | 34 (4.5%, [3.2% – 6.3%])                                         | 163 (32.4%, [28.3% – 36.7%])                                     |
| – Unimmunized (Zero-dose)                | 68 (5.4%, [4.2% – 6.8%])                              | 7 (0.9%, [0.4% – 1.9%])                                          | 61 (12.1%, [9.4% – 15.3%])                                       |

<sup>##</sup> Vaccines included in the definition of immunization status (Fully immunized child vs Partially immunized vs Unimmunized)

**Table 3:** Maternal health care utilization history and knowledge of routine immunization in Enugu State, Nigeria 2020

| Characteristics                                               | Fully immunized (n = 989) | Not fully immunized (n = 265) | Crude Odds ratio (95% CI) | p-value |
|---------------------------------------------------------------|---------------------------|-------------------------------|---------------------------|---------|
| <b>MOTHERS' HEALTH CARE UTILIZATION HISTORY</b>               |                           |                               |                           |         |
| <b>Use of Skilled birth attendants (SBA)</b>                  |                           |                               |                           |         |
| – Yes (Hospital)                                              | 309 (84.7%)               | 56 (15.3%)                    | 1.70 (1.23 – 2.35)        | 0.001   |
| – No (TBA, Home delivery)                                     | 680 (76.5%)               | 209 (23.5%)                   |                           |         |
| <b>Attended ante-natal care (ANC)</b>                         |                           |                               |                           |         |
| – ≥ Four ante-natal visits                                    | 762 (77.8%)               | 217 (22.2%)                   | 0.74 (0.53 – 1.05)        | 0.091   |
| – < Four ante-natal visits                                    | 227 (82.5%)               | 48 (17.5%)                    |                           |         |
| <b>Tetanus toxoid (TT) injection during pregnancy</b>         |                           |                               |                           |         |
| – ≥ 2 TT injections                                           | 784 (79.0%)               | 209 (21.0%)                   | 1.03 (0.74 – 1.43)        | 0.888   |
| – < 2 TT injection                                            | 205 (78.5%)               | 56 (21.5%)                    |                           |         |
| <b>Attended post-natal care (PNC)</b>                         |                           |                               |                           |         |
| – Yes                                                         | 866 (89.2%)               | 105 (10.8%)                   | 10.73 (7.87 – 14.63)      | < 0.001 |
| – No                                                          | 123 (43.5%)               | 160 (56.5%)                   |                           |         |
| <b>MOTHERS' AWARENESS OF ROUTINE IMMUNIZATION</b>             |                           |                               |                           |         |
| <b>What do vaccines do to your child's body?</b>              |                           |                               |                           |         |
| – Vaccines help prevent illness                               | 937 (78.5%)               | 256 (21.5%)                   | 0.63 (0.31 – 1.30)        | 0.210   |
| – Other responses **                                          | 44 (88.0%)                | 6 (12.0%)                     |                           |         |
| – I do not know **                                            | 8 (72.7%)                 | 3 (27.3%)                     |                           |         |
| <b>Mention any disease(s) children's vaccines can prevent</b> |                           |                               |                           |         |
| – Mentioned Four (4) or more diseases                         | 481 (90.6%)               | 50 (9.4%)                     | 4.07 (2.92 – 5.68)        | < 0.001 |
| – Less than four (4) diseases **                              | 502 (70.1%)               | 214 (29.9%)                   |                           |         |
| – I do not know **                                            | 6 (85.7%)                 | 1 (14.3%)                     |                           |         |
| <b>At what age does child immunization start?</b>             |                           |                               |                           |         |
| – Just after birth                                            | 858 (84.6%)               | 156 (15.4%)                   | 4.58 (3.37 – 6.22)        | < 0.001 |
| – Stated other dates (1 week, 1 month, etc.) **               | 95 (50.3%)                | 94 (49.7%)                    |                           |         |
| – I do not know **                                            | 36 (70.6%)                | 15 (29.4%)                    |                           |         |
| <b>When does a child complete his/her immunization?</b>       |                           |                               |                           |         |
| – 9 to 15 months                                              | 930 (79.6%)               | 238 (20.4%)                   | 1.79 (1.11 – 2.88)        | 0.016   |
| – < 6 months OR > 15 months **                                | 51 (67.1%)                | 25 (32.9%)                    |                           |         |
| – I do not know **                                            | 8 (80.0%)                 | 2 (20.0%)                     |                           |         |
| <b>What is the age/schedule for each vaccine?</b>             |                           |                               |                           |         |
| – Correct schedule for three or more vaccines                 | 952 (83.3%)               | 191 (16.7%)                   | 9.97 (6.52 – 15.24)       | < 0.001 |
| – Other responses **                                          | 26 (26.3%)                | 73 (73.7%)                    |                           |         |
| – I do not know **                                            | 11 (91.7%)                | 1 (8.3%)                      |                           |         |
| <b>How many HF visits are required for full immunization?</b> |                           |                               |                           |         |
| – At least 5 or 6 visits                                      | 686 (80.4%)               | 167 (19.6%)                   | 1.33 (1.00 – 1.76)        | 0.049   |
| – < 5 visits **                                               | 183 (88.0%)               | 25 (12.0%)                    |                           |         |
| – I do not know **                                            | 120 (62.2%)               | 73 (37.8%)                    |                           |         |
| <b>Scores for Knowledge of routine immunization</b>           |                           |                               |                           |         |
| – Mean Score (± Std Dev)                                      | 10.71 (1.61)              | 9.63 (1.82)                   | 1.07 (0.83 – 1.32) ##     | < 0.001 |

\*\* These responses were combined for estimation of Crude OR. | ## Mean difference (95% CI) | Abbreviations: HF, Health Facility

**Table 4:** Factors associated with immunization status of children aged 12-23 months in Enugu State, Nigeria, July 2020

| Socio-demographic Characteristics            | Reference                     | Adjusted OR | 95% CI       | p-value |
|----------------------------------------------|-------------------------------|-------------|--------------|---------|
| <b>INDIVIDUAL LEVEL FACTORS</b>              |                               |             |              |         |
| <b>Mothers' age</b>                          |                               |             |              |         |
| – < 20 years                                 | 20 – 29 years                 | 0.17        | 0.03 – 1.06  | 0.058   |
| – ≥ 30 years                                 | 20 – 29 years                 | 0.87        | 0.57 – 1.34  | 0.534   |
| <b>Marital status</b>                        |                               |             |              |         |
| – Single                                     | Married                       | 5.74        | 1.45 – 22.76 | 0.013   |
| – Divorced/Widowed                           | Married                       | 1.35        | 0.60 – 3.07  | 0.468   |
| <b>Mothers' educational status</b>           |                               |             |              |         |
| – Primary education or lower                 | Secondary education or higher | 0.64        | 0.26 – 1.56  | 0.383   |
| <b>Mother's working status</b>               |                               |             |              |         |
| – Working mom                                | Stay-at-home/Housewife        | 1.08        | 0.63 – 1.85  | 0.327   |
| <b>Religion of family</b>                    |                               |             |              |         |
| – Islam/Muslim                               | Christian                     | 1.53        | 0.27 – 8.62  | 0.627   |
| – African traditional                        | Christian                     | 2.21        | 0.44 – 11.13 | 0.335   |
| <b>Sex of the child</b>                      |                               |             |              |         |
| – Male                                       | Female                        | 0.98        | 0.66 – 1.45  | 0.914   |
| <b>Child's birth order</b>                   |                               |             |              |         |
| – Second/third child                         | First child                   | 1.52        | 0.78 – 2.98  | 0.220   |
| – Fourth and later children                  | First child                   | 1.34        | 0.48 – 3.74  | 0.577   |
| <b>MATERNAL HEALTHCARE UTILIZATION</b>       |                               |             |              |         |
| <b>Antenatal care (ANC)</b>                  |                               |             |              |         |
| – < 4 ANC visits                             | ≥ 4 ANC visits                | 1.52        | 0.71 – 3.22  | 0.472   |
| <b>Maternal tetanus toxoid (TT)</b>          |                               |             |              |         |
| – < 2 doses                                  | ≥ 2 doses                     | 0.93        | 0.41 – 2.10  | 0.864   |
| <b>Use of Skilled birth attendants (SBA)</b> |                               |             |              |         |
| – No                                         | Yes                           | 1.93        | 1.24 – 2.99  | 0.003   |
| <b>Postnatal care (PNC)</b>                  |                               |             |              |         |
| – No                                         | Yes                           | 6.53        | 4.17 – 10.22 | < 0.001 |
| <b>KNOWLEDGE OF ROUTINE IMMUNIZATION</b>     |                               |             |              |         |
| <b>Mothers' knowledge of RI</b>              |                               |             |              |         |
| – Poor                                       | Satisfactory                  | 1.76        | 1.09 – 2.87  | 0.022   |
| <b>COMMUNITY LEVEL FACTORS</b>               |                               |             |              |         |
| <b>Area of residence</b>                     |                               |             |              |         |
| – Rural                                      | Urban                         | 7.49        | 4.84 – 11.59 | < 0.001 |
| <b>Household monthly income</b>              |                               |             |              |         |
| – < N80,000 (Approx. USD 200)                | ≥ N80,000 (Approx. USD 200)   | 1.56        | 1.17 – 2.81  | < 0.001 |
| <b>Distance to nearest vaccination point</b> |                               |             |              |         |
| – ≥ 30 minutes' walk                         | < 30 minutes' walk            | 2.15        | 1.31 – 3.52  | 0.003   |

1  
2  
3  
4  
5  
6  
7  
8  
9  
10  
11  
12  
13  
14  
15  
16  
17  
18  
19  
20  
21  
22  
23  
24  
25  
26  
27  
28  
29  
30  
31  
32  
33  
34  
35  
36  
37  
38  
39  
40  
41  
42  
43  
44  
45  
46  
47  
48  
49  
50  
51  
52  
53  
54  
55  
56  
57  
58  
59  
60



Map of Nigeria above showing Enugu State and Map of Enugu state showing the study area (four LGAs). Adapted from image culled from Ugoyibo OV, Amaechi IF, Obinna AC. Evaluation of Groundwater Pollution Sources in Enugu North LGA of Enugu State , Nigeria. IJSAR J Environ Earth Phys Sci. 2015;2(3):54–69.

56x85mm (300 x 300 DPI)

**Supplement 1:** Reasons mothers of zero-dose (unvaccinated) children gave for not vaccinating their children

| Reasons                                         | Frequency<br>N = 68 | Proportion (%) |
|-------------------------------------------------|---------------------|----------------|
| ◦ I was busy with other things                  | 1                   | 1.5%           |
| ◦ Child was too sick to receive vaccines        | 3                   | 4.4%           |
| ◦ I did not know the schedule for vaccination   | 8                   | 11.8%          |
| ◦ There were no vaccines in our health facility | 26                  | 38.2%          |
| ◦ My religion forbids vaccination               | 1                   | 1.5%           |
| ◦ Vaccination site is too far                   | 29                  | 42.6%          |

For peer review only

**Supplement 2:** Comparing vaccine-specific coverage rate and FIC rate on the Enugu sub-set of 2018 Nigeria DHS dataset using DHS's and current study's definitions

| Vaccine-specific coverage rate | Current study | Authors' calculations from 2018 Nigeria DHS using DHS definition | Authors' calculations from 2018 Nigeria DHS using current study's definition |
|--------------------------------|---------------|------------------------------------------------------------------|------------------------------------------------------------------------------|
| ◦ BCG                          | 90.6%         | 92.8%                                                            | 92.8%                                                                        |
| ◦ Measles                      | 87.8%         | 80.4%                                                            | 80.4%                                                                        |
| ◦ DPT                          | --            | 74.3%                                                            | --                                                                           |
| ◦ Pentavalent 3                | 83.9%         | --                                                               | 80.4%                                                                        |
| ◦ OPV                          | --            | 44.3%                                                            | --                                                                           |
| ◦ Polio (tOPV; or bOPV + IPV)  | 83.1%         | --                                                               | 89.6%                                                                        |
| <b>FIC rate</b>                | <b>78.9%</b>  | <b>32.3%</b>                                                     | <b>68.1%</b>                                                                 |

tOPV = Triple OPV doses; bOPV = two OPV doses



**Supplement 3:** Comparing socio-demographic characteristics of mothers in the current study with mothers in the Enugu sample of the 2018 Nigeria DHS

| Socio-demographic characteristics | Current study sample (N = 1,254) | 2018 DHS Enugu sub-set (n = 105) | p-value |
|-----------------------------------|----------------------------------|----------------------------------|---------|
| <b>Mothers' age</b>               |                                  |                                  | 0.089   |
| ◦ < 20 years                      | 54 (4.3%)                        | 2 (1.9%)                         |         |
| ◦ 20 – 29 years                   | 602 (48.0%)                      | 42 (40.0%)                       |         |
| ◦ ≥ 30 years                      | 598 (47.7%)                      | 61 (58.1%)                       |         |
| <b>Marital status</b>             |                                  |                                  | 0.097   |
| ◦ Single                          | 50 (4.0%)                        | 7 (6.7%)                         |         |
| ◦ Currently married               | 1127 (89.9%)                     | 96 (91.4%)                       |         |
| ◦ Divorced/Separated              | 77 (6.1%)                        | 2 (1.9%)                         |         |
| <b>Educational status</b>         |                                  |                                  | 0.001   |
| ◦ Primary or lower                | 77 (6.1%)                        | 15 (14.3%)                       |         |
| ◦ Secondary or higher             | 1177 (93.9%)                     | 90 (85.7%)                       |         |
| <b>Mothers' occupation</b>        |                                  |                                  | < 0.001 |
| ◦ Stay-at-home/Housewife          | 307 (24.5%)                      | 47 (44.8%)                       |         |
| ◦ Working mom                     | 947 (75.5%)                      | 58 (55.2%)                       |         |
| <b>Religion</b>                   |                                  |                                  | 0.198   |
| ◦ Christian                       | 1214 (96.8%)                     | 104 (99.0%)                      |         |
| ◦ Others                          | 40 (3.2%)                        | 1 (1.0%)                         |         |
| <b>Ethnicity</b>                  |                                  |                                  | 0.498   |
| ◦ Igbos                           | 1201 (95.8%)                     | 102 (97.1%)                      |         |
| ◦ Others                          | 53 (4.2%)                        | 3 (2.9%)                         |         |
| <b>Birth order of child</b>       |                                  |                                  | < 0.001 |
| ◦ First born                      | 347 (27.7%)                      | 23 (21.9%)                       |         |
| ◦ Second/Third born               | 625 (49.8%)                      | 37 (35.2%)                       |         |
| ◦ Others                          | 282 (22.5%)                      | 45 (42.9%)                       |         |
| <b>Residence</b>                  |                                  |                                  | < 0.001 |
| ◦ Urban                           | 751 (59.9%)                      | 84 (80.0%)                       |         |
| ◦ Rural                           | 503 (40.1%)                      | 21 (20.0%)                       |         |

## Study Interview guide

### Factors associated with incomplete immunization in children aged 12 to 23 months at sub-national level, Nigeria – a cross-sectional study

#### \*\*INSTRUCTIONS\*\*

1. Seek permission from the mother to participate before you commence. If mother is < 18 years old, seek permission of the husband (if mother is < 18 years old and married) or mother's mother/father (if mother is < 18 years old and single)
2. If more than two children in the age bracket, only interview for the youngest child more than 12 months of age
3. Always be polite and courteous throughout the interview. NEVER Shout. NEVER Criticize.
4. Please complete ONE questionnaire for one/each child

#### Section A: Sociodemographic Data

1. Local Government Area: \_\_\_\_\_
2. Cluster or Ward: \_\_\_\_\_
3. Mother's age
  - a. < 20 yrs
  - b. 20 – 24 yrs
  - c. 25 – 29 yrs
  - d. 30 – 34 yrs
  - e. ≥ 35 yrs
4. Marital status
  - a. Single
  - b. Married
  - c. Divorced
  - d. Widow
5. Mother's education
  - a. None
  - b. Primary
  - c. Secondary
  - d. Tertiary
6. Mother's Occupation
  - a. Stay-at-home/Housewife
  - b. Farmer
  - c. Civil Servant
  - d. Trader
  - e. Artisan
7. Tribe/Ethnicity
  - a. Igbo
  - b. Hausa/Fulani

- c. Yoruba
- d. Igala
- e. Others

**8. Family religion**

- a. Christian
- b. Islam/Muslim
- c. African Traditional Religion

**9. Family monthly income**

- a. < N 40,000
- b. N40,000 to N79,999
- c. N80,000 to N119,999
- d. ≥ N120,000

**10. Sex of child**

- a. Female/Girl
- b. Male/Boy

**11. Birth order in the family**

- a. First born
- b. Second or third born
- c. Others

**Section B: Prevalence & Determinants**

**1. Has your child been vaccinated?**

- A. YES
- B. NO

**>> If YES to Q1 above, when was your child vaccinated?**

- A. At the appropriate age
- B. Later than appropriate date

**2. Please where is the Immunization card? Is the mother able to provide the card?**

- A. YES
- B. NO

**>> If mother is NOT able to provide the card, Why?**

- A. Mother cannot find it during interview
- B. Mother lost card before interview, i.e. could not find the card before the day of interview
- C. Mother was not given any immunization card at health centre

**3. How many antenatal care visits did you attend while pregnant for this child?**

- A. None, I did not attend any antenatal clinic
- B. Only one visit
- C. Two visits
- D. Three visits
- E. Four visits or more

1  
2  
3  
4  
5  
6  
7  
8  
9  
10  
11  
12  
13  
14  
15  
16  
17  
18  
19  
20  
21  
22  
23  
24  
25  
26  
27  
28  
29  
30  
31  
32  
33  
34  
35  
36  
37  
38  
39  
40  
41  
42  
43  
44  
45  
46  
47  
48  
49  
50  
51  
52  
53  
54  
55  
56  
57  
58  
59  
60

4. **How many TT injections did you receive during pregnancy?**

- A. None, I did not receive any TT injection
- B. One injection
- C. Two or more injections

12. **Where did you deliver this child?**

- A. In a hospital
- B. With Traditional birth attendants (TBA)
- C. At home

5. **Did you attend any post-natal care consultation after delivering this child?**

- A. YES
- B. NO

6. **Where did you hear of vaccination?** (Please tick all that apply)

- A. Hospital/Health facility
- B. Family/friends
- C. Church/Mosque
- D. TV
- E. Radio
- F. Social media (Facebook, Twitter, WhatsApp, Instagram)

7. **What does vaccination do to your child's body?**

- A. Vaccination prevent illnesses in children
- B. Vaccines treat illnesses in children like drugs
- C. Vaccines provide nutrients to children like food
- D. I do not know

8. **Please mention any disease vaccination can prevent:**

*(Use this list to assess mothers' response: Tuberculosis, Diphtheria, Whooping cough, Tetanus, Poliomyelitis, Hepatitis B virus infection, Measles, Pneumococcal pneumonia)*

- A. Mother mentions four (4) or more diseases
- B. Mother mentions three (3) or fewer diseases
- C. I do not know any diseases vaccination can prevent

9. **When do you start to vaccinate a child?**

- A. Just after birth
- B. 1 week after birth
- C. 2 weeks after birth
- D. 1 month after birth
- E. Anytime
- F. I do not know

10. **When does a child complete his routine vaccination?**

- A. 6 months
- B. 9 months
- C. 12 months (1 year)

- 1 D. 15 months  
 2 E. 2 years  
 3 F. 5 years  
 4 G. I do not know  
 5  
 6  
 7

8 **11. Do you know the right age or schedule for routine vaccination of infants?**

9 *(Use vaccination schedule on the paper titled, 'NPHCDA routine immunization schedule' to assess mothers' response)*

- 10 A. Mother mentions correct schedule for three (3) or more vaccines  
 11 B. Mother mentions correct schedule for one or two vaccines  
 12 C. I do not know  
 13

14 **12. How many visits are needed to complete the immunization for a child**

- 15 A. One (1) visit  
 16 B. 2 or 3 visits  
 17 C. 5 or 6 visits  
 18 D. I do not know  
 19

20 **13. Using the Google Map app on your phone, how far is the nearest vaccination centre to this house?**

- 21 A. Less than 30 mins walk  
 22 B. About or more 30 mins' walk  
 23  
 24  
 25  
 26  
 27  
 28

29 **Section C: Immunization status**

30 If you answered YES to Question 1 above, which of these vaccines has he/she received?

31 **Step 1:** FIRST, ask the mothers to know how many vaccinations she can recall, and tick accordingly

32 **Step 2:** Then, cross check with the Vaccination/Immunization Card, if available, and tick accordingly

| S/n | Vaccine                | Age      | 1). Mothers recall |    | 2). Immunization Card |    |
|-----|------------------------|----------|--------------------|----|-----------------------|----|
|     |                        |          | YES                | NO | YES                   | NO |
| 1   | BCG                    | At birth |                    |    |                       |    |
| 2   | OPV-1                  | 6 weeks  |                    |    |                       |    |
| 3   | OPV-2                  | 10 weeks |                    |    |                       |    |
| 4   | OPV-3 or Polio vaccine | 14 weeks |                    |    |                       |    |
| 5   | Pentavalent – 1        | 6 weeks  |                    |    |                       |    |
| 6   | Pentavalent – 2        | 10 weeks |                    |    |                       |    |
| 7   | Pentavalent – 3        | 14 weeks |                    |    |                       |    |
| 8   | Vitamin A              | 6 months |                    |    |                       |    |
| 9   | Measles vaccine        | 9 months |                    |    |                       |    |
| 10  | Yellow fever           | 9 months |                    |    |                       |    |

33 **\*\* The END \*\***

34 Thank the mother profusely .... Daalu nnukwu / Thank you very much!!

**STROBE 2007 (v4) Statement—Checklist of items that should be included in reports of *cross-sectional studies***

| Section/Topic                | Item # | Recommendation                                                                                                                                                                       | Reported on page # |
|------------------------------|--------|--------------------------------------------------------------------------------------------------------------------------------------------------------------------------------------|--------------------|
| <b>Title and abstract</b>    | 1      | (a) Indicate the study's design with a commonly used term in the title or the abstract                                                                                               | 1                  |
|                              |        | (b) Provide in the abstract an informative and balanced summary of what was done and what was found                                                                                  | 1                  |
| <b>Introduction</b>          |        |                                                                                                                                                                                      |                    |
| Background/rationale         | 2      | Explain the scientific background and rationale for the investigation being reported                                                                                                 | 2,3                |
| Objectives                   | 3      | State specific objectives, including any prespecified hypotheses                                                                                                                     | 3                  |
| <b>Methods</b>               |        |                                                                                                                                                                                      |                    |
| Study design                 | 4      | Present key elements of study design early in the paper                                                                                                                              | 3                  |
| Setting                      | 5      | Describe the setting, locations, and relevant dates, including periods of recruitment, exposure, follow-up, and data collection                                                      | 3                  |
| Participants                 | 6      | (a) Give the eligibility criteria, and the sources and methods of selection of participants                                                                                          | 4                  |
| Variables                    | 7      | Clearly define all outcomes, exposures, predictors, potential confounders, and effect modifiers. Give diagnostic criteria, if applicable                                             | 4                  |
| Data sources/<br>measurement | 8*     | For each variable of interest, give sources of data and details of methods of assessment (measurement). Describe comparability of assessment methods if there is more than one group | 4                  |
| Bias                         | 9      | Describe any efforts to address potential sources of bias                                                                                                                            | 4                  |
| Study size                   | 10     | Explain how the study size was arrived at                                                                                                                                            | 3,4                |
| Quantitative variables       | 11     | Explain how quantitative variables were handled in the analyses. If applicable, describe which groupings were chosen and why                                                         | 4                  |
| Statistical methods          | 12     | (a) Describe all statistical methods, including those used to control for confounding                                                                                                | 5                  |
|                              |        | (b) Describe any methods used to examine subgroups and interactions                                                                                                                  | 5                  |
|                              |        | (c) Explain how missing data were addressed                                                                                                                                          | 5                  |
|                              |        | (d) If applicable, describe analytical methods taking account of sampling strategy                                                                                                   | 5                  |
|                              |        | (e) Describe any sensitivity analyses                                                                                                                                                | 5                  |
| <b>Results</b>               |        |                                                                                                                                                                                      |                    |

|                          |     |                                                                                                                                                                                                              |                |
|--------------------------|-----|--------------------------------------------------------------------------------------------------------------------------------------------------------------------------------------------------------------|----------------|
| Participants             | 13* | (a) Report numbers of individuals at each stage of study—eg numbers potentially eligible, examined for eligibility, confirmed eligible, included in the study, completing follow-up, and analysed            | 5              |
|                          |     | (b) Give reasons for non-participation at each stage                                                                                                                                                         | Not applicable |
|                          |     | (c) Consider use of a flow diagram                                                                                                                                                                           | Not applicable |
| Descriptive data         | 14* | (a) Give characteristics of study participants (eg demographic, clinical, social) and information on exposures and potential confounders                                                                     | 5              |
|                          |     | (b) Indicate number of participants with missing data for each variable of interest                                                                                                                          | Not applicable |
| Outcome data             | 15* | Report numbers of outcome events or summary measures                                                                                                                                                         | 5              |
| Main results             | 16  | (a) Give unadjusted estimates and, if applicable, confounder-adjusted estimates and their precision (eg, 95% confidence interval). Make clear which confounders were adjusted for and why they were included | 5              |
|                          |     | (b) Report category boundaries when continuous variables were categorized                                                                                                                                    | 5              |
|                          |     | (c) If relevant, consider translating estimates of relative risk into absolute risk for a meaningful time period                                                                                             |                |
| Other analyses           | 17  | Report other analyses done—eg analyses of subgroups and interactions, and sensitivity analyses                                                                                                               | 5              |
| <b>Discussion</b>        |     |                                                                                                                                                                                                              |                |
| Key results              | 18  | Summarise key results with reference to study objectives                                                                                                                                                     | 6              |
| Limitations              | 19  | Discuss limitations of the study, taking into account sources of potential bias or imprecision. Discuss both direction and magnitude of any potential bias                                                   | 6,7            |
| Interpretation           | 20  | Give a cautious overall interpretation of results considering objectives, limitations, multiplicity of analyses, results from similar studies, and other relevant evidence                                   | 6              |
| Generalisability         | 21  | Discuss the generalisability (external validity) of the study results                                                                                                                                        | 7              |
| <b>Other information</b> |     |                                                                                                                                                                                                              |                |
| Funding                  | 22  | Give the source of funding and the role of the funders for the present study and, if applicable, for the original study on which the present article is based                                                | 9              |

\*Give information separately for cases and controls in case-control studies and, if applicable, for exposed and unexposed groups in cohort and cross-sectional studies.

**Note:** An Explanation and Elaboration article discusses each checklist item and gives methodological background and published examples of transparent reporting. The STROBE checklist is best used in conjunction with this article (freely available on the Web sites of PLoS Medicine at <http://www.plosmedicine.org/>, Annals of Internal Medicine at <http://www.annals.org/>, and Epidemiology at <http://www.epidem.com/>). Information on the STROBE Initiative is available at [www.strobe-statement.org](http://www.strobe-statement.org).
